# Supplementary material
Source: PubMed Central journal article supplement (PMC3415592)

# Silver-Catalyzed Formal Inverse Electron-Demand Diels-Alder Reaction of 1,2-Diazines and Siloxy Alkynes

## Supporting Information

Yunus E. Türkmen, Timothy J. Montavon, Sergey A. Kozmin,\* and Viresh H. Rawal\*

*Chicago Tri-Institutional Center for Chemical Methods and Library Development,  
Department of Chemistry, The University of Chicago, Chicago, Illinois 60637, USA*

### Table of Contents

|      |                                                                                                  |
|------|--------------------------------------------------------------------------------------------------|
| S-2  | General information                                                                              |
| S-2  | Materials                                                                                        |
| S-3  | Preparation of siloxy alkynes                                                                    |
| S-5  | Preparation of 1,2-diazines                                                                      |
| S-10 | Experimental procedures for the cycloaddition reactions and characterizations of the products    |
| S-29 | $^1\text{H}$ and $^{13}\text{C}$ NMR studies on the complexation of $\text{Ag}^+$ to phthalazine |
| S-32 | $^1\text{H}$ and $^{13}\text{C}$ NMR spectra                                                     |

**General Information.** All reactions were performed using oven or flame-dried glassware under an inert atmosphere of nitrogen. Silver-catalyzed reactions were performed with the fume hood lights off, but no other precautions were taken to exclude ambient light. Reactions were monitored by thin-layer chromatography (TLC) on Whatman silica gel 60 Å F254 plates and visualized by UV and/or with  $\text{KMnO}_4$  staining solution. Flash column chromatography was performed on Silicycle 40-63  $\mu\text{m}$  Flash silica gel. NMR spectra were measured on Brüker DRX and DMX spectrometers at 500 MHz for  $^1\text{H}$  spectra and 125 MHz for  $^{13}\text{C}$  spectra and calibrated from internal standard (TMS, 0 ppm) or residual solvent signals (chloroform at 7.26 ppm, benzene at 7.16 ppm and methylene chloride at 5.32 ppm for  $^1\text{H}$  spectra; chloroform at 77.0 ppm, benzene at 128.39 ppm and methylene chloride at 54.0 ppm for  $^{13}\text{C}$  spectra).  $^1\text{H}$ -NMR data are reported as follows: chemical shift (parts per million, ppm), multiplicity (s = singlet, d = doublet, t = triplet, quin = quintet, sep = septet, dd = doublet of doublets, dt = doublet of triplets, m = multiplet, br = broad, app = apparent), coupling constant (Hz) and integration. Infrared spectra were measured on a Nicolet 6700 FT-IR spectrometer on NaCl plates. Mass spectral analysis was performed by the College of Sciences Major Instrumentation Cluster at Old Dominion University (Norfolk, VA) directed by Susan Hatcher. Melting points were determined using a Thomas Hoover Uni-Melt Capillary Melting Point Apparatus and are uncorrected.

**Materials.** Dichloromethane ( $\text{CH}_2\text{Cl}_2$ ) and tetrahydrofuran (THF) were purified by passage over activated alumina using an Innovative Technology solvent purification system. Triisopropyl trifluoromethanesulfonate (TIPSOTf) was distilled under reduced pressure over calcium hydride. Hexamethyldisilazane (HMDS) was distilled under positive pressure of nitrogen over calcium hydride. Phthalazine was purified by flash column chromatography (ethyl acetate) and stored in a desiccator. 1-chlorophthalazine was purified by flash column chromatography (gradient of EtOAc/ $\text{CH}_2\text{Cl}_2$ ) prior to use. Silver trifluoromethanesulfonate ( $\text{AgOTf}$ ) (99%) was purchased from Strem Chemicals, Inc. and stored in a desiccator. Silver bis(trifluoromethanesulfonyl)imide ( $\text{AgNTf}_2$ ) (97%) was purchased from Aldrich Chemical Co. and stored in a desiccator. All other commercially available reagents were used as received unless stated otherwise.

## Preparation of Siloxy Alkynes

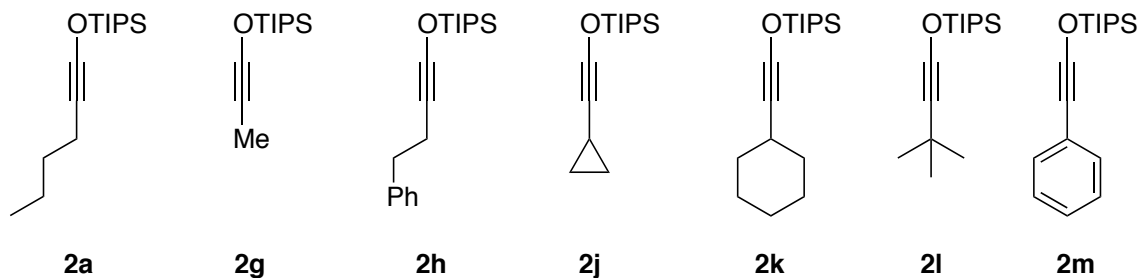

The previously known siloxy alkynes **2a**,<sup>1</sup> **2g**,<sup>2</sup> **2h**,<sup>3</sup> **2j**,<sup>4</sup> **2k**,<sup>2</sup> **2l**<sup>5</sup> and **2m**<sup>2</sup> were prepared according to the reported procedures.

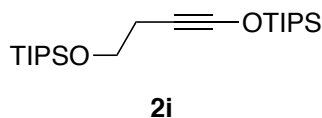

A 500-mL flame-dried, three-necked, round-bottomed flask equipped with a stir bar, fitted with rubber septa and a nitrogen inlet was charged with THF (125 mL) and (but-3-yn-1-yloxy)triisopropylsilane (9.06g, 40.0 mmol). The resulting solution was cooled to -78 °C and anhydrous *t*-BuOOH (10.0 mL of a 4.40 M solution in nonane, 44.0 mmol) was added dropwise. CAUTION! SOLUTIONS OF OXIDANTS AND OXIDIZABLE SUBSTRATES ARE POTENTIALLY HAZARDOUS AND POSSIBLY SUBJECT TO VIOLENT DECOMPOSITION BY ADVENTITIOUS CATALYSIS. A syringe pump was used to add freshly prepared LiHMDS (96.0 mL of a 1M solution in THF, 96.0 mmol) to the reaction mixture over a period of 30 minutes. The resultant mixture was allowed to warm to 0 °C, and was stirred at this temperature for 2 h. The reaction mixture was then cooled to -78 °C, TIPSOTf (11.82 mL, 44.0 mmol) was added dropwise via a syringe pump over a period of 10 min, and the mixture was allowed to stir for 5 min at this temperature. The reaction vessel was transferred to a 0 °C ice water bath and was

<sup>1</sup> Schramm, M. P.; Shubinets, V.; Kozmin, S. A. *Org. Synth.* **2010**, *87*, 253-263.

<sup>2</sup> Sun, J.; Keller, V. A.; Meyer, S. T.; Kozmin, S. A. *Adv. Synth. Catal.* **2010**, *352*, 839-842.

<sup>3</sup> Zhang, L.; Kozmin, S. A. *J. Am. Chem. Soc.* **2004**, *126*, 10204-10205.

<sup>4</sup> Montavon, T. J.; Li, J.; Cabrera-Pardo, J. R.; Mrksich, M.; Kozmin, S. A. *Nat. Chem.* **2012**, *4*, 45-51.

<sup>5</sup> Sun, J.; Meyer, S. T.; Kozmin, S. A. *Angew. Chem. Int. Ed.* **2006**, *45*, 4991-4993.

allowed to stir for an additional 30 minutes. The reaction was quenched by addition of hexanes (200 mL). The crude mixture was then transferred to a separatory funnel and was washed with saturated aqueous NaHCO<sub>3</sub> (150 mL). The organic layer was collected, and the aqueous layer was extracted with hexanes (2 x 50 mL). The combined organic layers were washed with saturated aqueous Na<sub>2</sub>S<sub>2</sub>O<sub>3</sub> (125 mL) and brine (100 mL). The organic layer was collected, dried with MgSO<sub>4</sub>, filtered, and concentrated by rotary evaporation. Volatile impurities were removed by Kugelrohr distillation, and the resulting mixture was purified via flash chromatography over basic alumina using hexanes as the eluent, affording siloxy alkyne **2i** as a clear oil (6.62 g, 16.6 mmol, 42 % yield).

<sup>1</sup>H NMR (500 MHz, C<sub>6</sub>D<sub>6</sub>): δ 3.83 (t, *J* = 7.0 Hz, 2H), 2.50 (t, *J* = 7.0 Hz, 2H), 1.19-1.03 (m, 42H); <sup>13</sup>C NMR (125 MHz, C<sub>6</sub>D<sub>6</sub>): δ 88.4, 64.4, 28.3, 22.8, 18.6, 17.9, 12.7, 12.5; IR (film): 2945, 2868, 2282, 1464, 1249, 1108, 883 cm<sup>-1</sup>; HRMS (ESI) Calcd for (C<sub>22</sub>H<sub>46</sub>O<sub>2</sub>Si<sub>2</sub>)Na<sup>+</sup> (M+Na)<sup>+</sup>: 421.2929, Found: 421.2922.

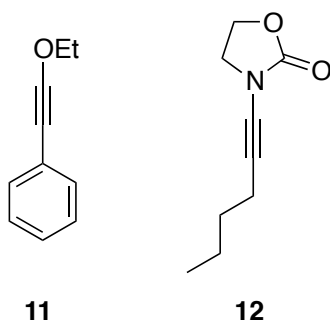

The previously known ethoxy alkyne **11**<sup>6</sup> and ynamide **12**<sup>7</sup> were prepared according to the reported procedures.

<sup>6</sup> Davies, P. W.; Cremonesi, A.; Dumitrescu, L. *Angew. Chem. Int. Ed.* **2011**, *50*, 8931-8935.

<sup>7</sup> Frederick, M. O.; Mulder, J. A.; Tracey, M. R.; Hsung, R. P.; Huang, J.; Kurtz, K. C. M.; Shen, L.; Douglas, C. J. *J. Am. Chem. Soc.* **2003**, *125*, 2368-2369.

## Preparation of 1,2-Diazines

## General Procedure for the Reduction of Dicarboxylic Acids.

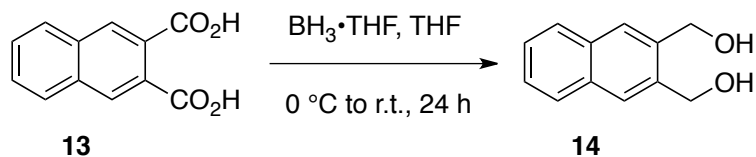

**Naphthalene-2,3-bis(methylene)diol (14).** The following procedure was adapted from the work of Weber and Wilcox.<sup>8</sup> A 250-mL flame-dried, three-necked, round-bottomed flask equipped with a stir bar, fitted with rubber septa and a nitrogen inlet was charged with naphthalene-2,3-dicarboxylic acid (**13**) (6.350 g, 29.4 mmol) and THF (40 mL). The resulting mixture was cooled to 0 °C and  $\text{BH}_3 \cdot \text{THF}$  (76.4 mL of a 1 M solution, 76.4 mmol) was added dropwise via syringe pump at a rate of 0.3 mL/min. After addition of  $\text{BH}_3 \cdot \text{THF}$  was complete, the reaction mixture was warmed to room temperature and allowed to proceed for 24 h. The resulting mixture was cooled to 0 °C and quenched by dropwise addition of a 1:1 mixture of THF:H<sub>2</sub>O (40 mL). Solid  $\text{K}_2\text{CO}_3$  was added until the aqueous and organic layers separated. The resulting mixture was transferred to a separatory funnel; the organic layer was collected, and the aqueous layer was extracted with THF (2 x 50 mL). The organic layers were combined, dried with  $\text{MgSO}_4$ , filtered and concentrated via rotary evaporation. The residue was dried *in vacuo* to give 5.534 g of **14** (29.4 mmol, quantitative yield) as a white solid, which was used without further purification. Spectral data for **14** matches published reports.<sup>8</sup>

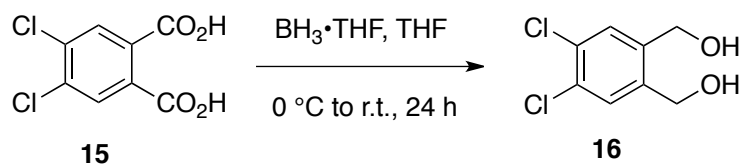

**(4,5-Dichloro-1,2-phenylene)dimethanol (16).** Following the general procedure for reduction of dicarboxylic acids, 9.725 g of **16** (46.97 mmol, quantitative yield) was obtained from the reduction of 4,5-dichlorophthalic acid (**15**) (11.040 g, 46.97 mmol)

<sup>8</sup> Wilcox, C. F. Jr.; Weber, K. A. *J. Org. Chem.* **1986**, *51*, 1088-1094.

with  $\text{BH}_3 \cdot \text{THF}$  (122.1 mL of a 1 M solution, 122.1 mmol). Spectral data for **16** matches published reports.<sup>9</sup>

### General Procedure for the Swern Oxidation

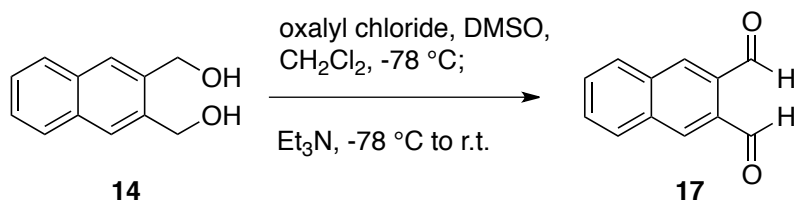

**Naphthalene-2,3-dicarbaldehyde (17).** The following procedure was adapted from the work of Farooq.<sup>9</sup> A 250-mL flame-dried, three-necked, round-bottomed flask equipped with a stir bar, fitted with rubber septa and a nitrogen inlet was charged with 100 mL of  $\text{CH}_2\text{Cl}_2$  and oxalyl chloride (5.23 mL, 61.8 mmol), and the resulting solution was cooled to  $-78\text{ }^\circ\text{C}$ . A solution of DMSO (8.80 mL, 123.7 mmol) in  $\text{CH}_2\text{Cl}_2$  was added to the flask via syringe pump at a rate of 0.35 mL/min and the resulting mixture was stirred for 10 minutes after the addition of DMSO was complete. A solution of diol **14** (5.291 g, 28.11 mmol) in  $\text{CH}_2\text{Cl}_2$  was then added to the reaction mixture via syringe pump at a rate of 0.35 mL/min. The resulting mixture was stirred for 30 minutes and  $\text{Et}_3\text{N}$  (68.6 mL, 491.9 mmol) was added at a rate of 0.75 mL/min via a syringe pump. The mixture was stirred at  $-78\text{ }^\circ\text{C}$  for 10 min, warmed to  $0\text{ }^\circ\text{C}$  and stirred for 2 hours. Following warming to room temperature, the reaction mixture was quenched with 200 mL of cold water and transferred to a separatory funnel. The organic layer was collected, and the aqueous layer was extracted with  $\text{CH}_2\text{Cl}_2$  (2 x 100 mL). The combined organic layers were washed with sat.  $\text{NaHCO}_3$  (1 x 100 mL), brine (1 x 200 mL), collected, dried with  $\text{MgSO}_4$ , filtered, and concentrated via rotary evaporation. The crude product was purified by flash chromatography (hexanes:ethyl acetate 9:1 to 4:1) to give 5.330 g of **17** (28.94 mmol, 81 % yield) as a white solid. Spectral data for **17** matches published reports.<sup>10</sup>

<sup>9</sup> Farooq, O. *Synthesis* **1994**, 1035-1036.

<sup>10</sup> Lin, C-H.; Lin, K-H.; Pal, B.; Tsou, L-D. *Chem. Commun.* **2009**, 803-805.

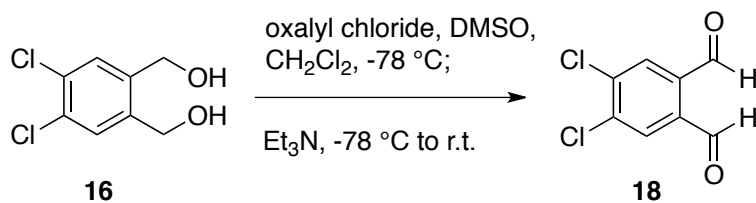

**4,5-Dichlorophthalaldehyde (18).** Following the general procedure for the Swern oxidation of diols, 2.253 g of **18** (11.10 mmol, 70 % yield) was obtained from (4,5-dichloro-1,2-phenylene)dimethanol (**16**) (3.282 g, 15.85 mmol) after purification by flash chromatography (hexanes: ethyl acetate 9:1 to 4:1). Spectral data for **18** matches published reports.<sup>9</sup>

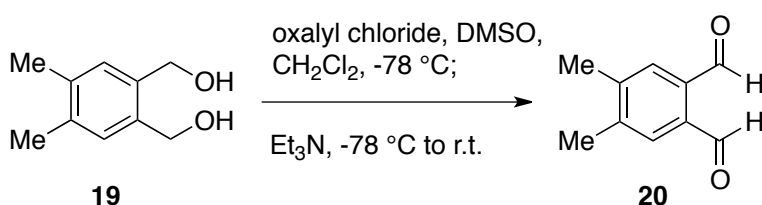

**4,5-Dimethylphthalaldehyde (20).** Following the general procedure for the Swern oxidation of diols, 5.330 g of **20** (32.86 mmol, 92 % yield) was obtained from (4,5-dimethyl-1,2-phenylene)dimethanol (**19**) (5.951 g, 35.80 mmol) after purification by flash chromatography (hexanes to 9:1 hexanes:ethyl acetate). Spectral data for **20** matches published reports.<sup>9</sup>

### General Procedure for the Synthesis of 1,2-Diazines

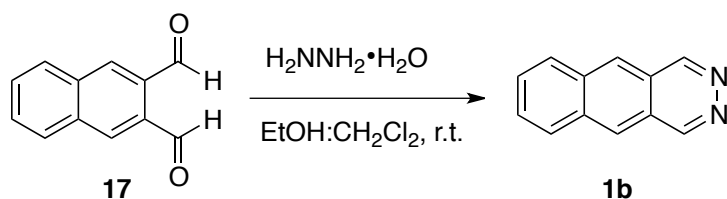

**Benzo[g]phthalazine (1b).** The following procedure was adapted from work of Sivasankaran and Zimmerman.<sup>11</sup> A solution of dialdehyde **17** (3.990g, 21.66 mmol) in 1:1 CH<sub>2</sub>Cl<sub>2</sub>:EtOH (40 mL) was added to a round-bottomed flask containing a solution of H<sub>2</sub>NNH<sub>2</sub> · H<sub>2</sub>O (3.16 mL, 64.99 mmol) in 33 mL of EtOH at 0 °C via syringe pump at a rate of 0.25 mL/min. The reaction was warmed to room temperature and was allowed to

<sup>11</sup> Sivasankaran, R.; Zimmerman, K. International Patent WO2008/008821, **2008**.

proceed for 2 h. The reaction mixture was concentrated via rotary evaporation. Toluene (100 mL) was added to the crude material, the resulting mixture was stirred for 10 min at room temperature, and the solvent was removed by rotary evaporation. This process was repeated with CH<sub>2</sub>Cl<sub>2</sub> (100 mL), and the crude residue was purified by flash chromatography (ethyl acetate to 9:1 ethyl acetate:isopropanol) to give 3.549 g of **1b** as a white solid (19.69 mmol, 91 % yield).

<sup>1</sup>H NMR (500 MHz, CDCl<sub>3</sub>): δ 9.62 (s, 2H), 8.54 (s, 2H), 8.17-8.16 (m, 2H), 7.72-7.70 (m, 2H); <sup>13</sup>C NMR (125 MHz, CDCl<sub>3</sub>): δ 151.7, 135.1, 129.0, 128.4, 126.5, 123.0; HRMS (ESI) Calcd for C<sub>12</sub>H<sub>9</sub>N<sub>2</sub><sup>+</sup> (M+H)<sup>+</sup> : 181.0766, Found: 181.0769.

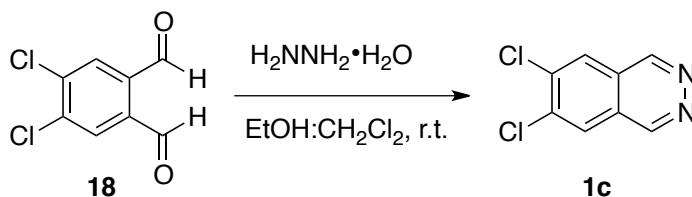

**6,7-Dichlorophthalazine (1c).** Following the general procedure for the synthesis of 1,2-diazines, 1.637 g of **1c** (8.220 mmol, 67 % yield) was obtained as a white solid from 4,5-dichlorophthalaldehyde (**18**) (2.490 g, 12.267 mmol) and H<sub>2</sub>NNH<sub>2</sub> · H<sub>2</sub>O (1.79 mL, 36.80 mmol) after purification by flash chromatography (CH<sub>2</sub>Cl<sub>2</sub> to 1:1 CH<sub>2</sub>Cl<sub>2</sub>: ethyl acetate).

<sup>1</sup>H NMR (500 MHz, CDCl<sub>3</sub>): δ 9.49 (s, 2H), 8.11 (s, 2H); <sup>13</sup>C NMR (125 MHz, CDCl<sub>3</sub>): δ 149.4, 137.8, 127.7, 125.2; HRMS (ESI) Calcd for C<sub>8</sub>H<sub>5</sub>N<sub>2</sub>Cl<sub>2</sub><sup>+</sup> (M+H)<sup>+</sup> : 198.9830, Found: 198.9825.

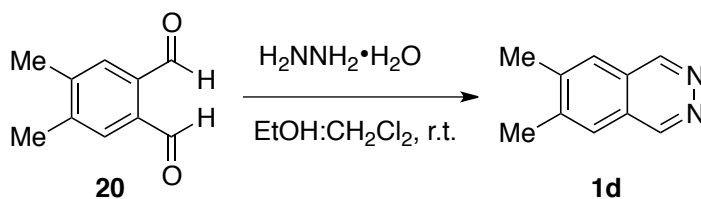

**6,7-Dimethylphthalazine (1d).** Following the general procedure for synthesis of 1,2-diazines, 4.081 g of **1d** (25.80 mmol, 79 % yield) was obtained as a white solid from 4,5-dimethylphthalaldehyde (**20**) (5.323 g, 32.82 mmol) and H<sub>2</sub>NNH<sub>2</sub> · H<sub>2</sub>O (4.78 mL, 98.5



mmol) after purification by flash chromatography (ethyl acetate to 9:1 ethyl acetate:isopropanol).

$^1\text{H}$  NMR (500 MHz,  $\text{CDCl}_3$ ):  $\delta$  9.41 (s, 2H), 7.70 (s, 2H), 2.53 (s, 6H);  $^{13}\text{C}$  NMR (125 MHz,  $\text{CDCl}_3$ ):  $\delta$  150.4, 143.3, 125.7, 125.5, 20.7; HRMS (ESI) Calcd for  $\text{C}_{10}\text{H}_{11}\text{N}_2^+$  ( $\text{M}+\text{H}$ ) $^+$ : 159.0922, Found: 159.0918.

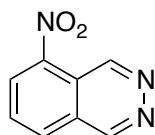**1f**

Diazine **1f** was prepared according to the reported procedure.<sup>12</sup>

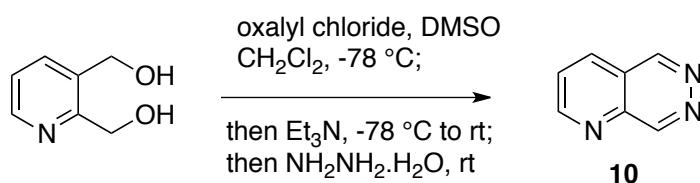

Pyrido[2,3-d]pyridazine **10**<sup>13</sup> was prepared as follows:

A 250-mL, oven-dried, round-bottomed flask equipped with a magnetic stir bar was charged with oxalyl chloride (1.21 mL, 14.3 mmol) and 20 mL of  $\text{CH}_2\text{Cl}_2$ , and the resulting solution was cooled to  $-78\text{ }^\circ\text{C}$ . A solution of DMSO (2.02 mL, 28.5 mmol) in  $\text{CH}_2\text{Cl}_2$  (5 mL + 3 mL for rinsing the flask) was added to the oxalyl chloride solution dropwise over 20 min and the resulting mixture was stirred for 15 min. A solution of 2,3-bis(hydroxymethyl)pyridine<sup>14</sup> (901 mg, 6.5 mmol) in a mixture of 10 mL  $\text{CH}_2\text{Cl}_2$  and 1.0 mL DMSO was then added to the reaction over 20 min. The flask of the diol was rinsed once more with a mixture of 5 mL  $\text{CH}_2\text{Cl}_2$  and 0.5 mL DMSO. The resulting mixture was

<sup>12</sup> Gomtsyan, A.; Bayburt, E. K.; Schmidt, R. G.; Zheng, G. Z.; Perner, R. J.; Didomenico, S.; Koenig, J. R.; Turner, S.; Jinkerson, T.; Drizin, I.; Hannick, S. M.; Macri, B. S.; McDonald, H. A.; Honore, P.; Wismer, C. T.; Marsh, K. C.; Wetter, J.; Stewart, K. D.; Oie, T.; Jarvis, M. F.; Surowy, C. S.; Faltynek, C. R.; Lee, C. H. *J. Med. Chem.* **2005**, *48*, 744-752.

<sup>13</sup> Paul, D. B.; Rodda, H. J. *Aust. J. Chem.* **1968**, *21*, 1291-1310.

<sup>14</sup> Yoshiizumi, K.; Yamamoto, M.; Miyasaka, T.; Ito, Y.; Kumihara, H.; Sawa, M.; Kiyoi, T.; Yamamoto, T.; Nakajima, F.; Hirayama, R.; Kondo, H.; Ishibushi, E.; Ohmoto, H.; Inoue, Y.; Yoshino, K. *Bioorg. Med. Chem.* **2003**, *11*, 433-450.

stirred at  $-78\text{ }^{\circ}\text{C}$  for 30 min and  $\text{Et}_3\text{N}$  (15.8 mL, 113.3 mmol) was added over 15 min. After stirring at  $-78\text{ }^{\circ}\text{C}$  for an additional 5 min, the dry ice-acetone bath was replaced with ice-water bath and the reaction was allowed to proceed for 1 h at  $0\text{ }^{\circ}\text{C}$  and for 1 h at room temperature.  $\text{NH}_2\text{NH}_2\cdot\text{H}_2\text{O}$  (0.94 mL, 19.4 mmol) was added and the resulting mixture was stirred at room temperature for 12 h. It was then diluted with  $\text{CH}_2\text{Cl}_2$ , filtered through a plug of silica and washed several times with several EtOAc. The filtrate was concentrated *in vacuo* and the residue was purified by flash column chromatography (EtOAc only) to afford pure pyrido[2,3-d]pyridazine **10** (534 mg, 63%) as a yellow solid.

mp:  $149\text{--}150\text{ }^{\circ}\text{C}$  (lit.<sup>13</sup> mp:  $154\text{--}155\text{ }^{\circ}\text{C}$ );  $^1\text{H}$  NMR (500 MHz,  $\text{CDCl}_3$ ):  $\delta$  9.78 (s, 1H), 9.58 (d,  $J = 1.3$  Hz, 1H), 9.26 (dd,  $J = 4.3, 1.5$  Hz, 1H), 8.31 (dt,  $J = 8.3, 0.7$  Hz, 1H), 7.84 (dd,  $J = 8.2, 4.3$  Hz, 1H);  $^{13}\text{C}$  NMR (125 MHz,  $\text{CDCl}_3$ ):  $\delta$  156.6, 153.0, 150.7, 141.9, 134.1, 127.4, 122.2.

### Representative Procedure for the Cycloaddition Reaction of 1,2-Diazines and Siloxy Alkynes:

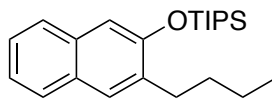

**3a**

An oven-dried test tube was charged with phthalazine **1a** (130 mg, 1.0 mmol), evacuated under vacuum and refilled with nitrogen three times. Another oven-dried test tube was charged with 2,2'-bipyridine **8** (8.6 mg, 0.055 mmol) and  $\text{AgNTf}_2$  (19.4 mg, 0.05 mmol). It was evacuated and refilled with nitrogen three times and then 2.5 mL of anhydrous  $\text{CH}_2\text{Cl}_2$  was added. The resulting clear, colorless solution was stirred under nitrogen for 10 min and 0.5 mL of this solution was added via syringe to the test tube containing phthalazine. An additional 0.5 mL of  $\text{CH}_2\text{Cl}_2$  was added and the resulting clear, light yellow solution was stirred for 15 min. Siloxy alkyne **2a** (331 mg, 1.3 mmol) was weighed in a 1.0 mL syringe and added to the reaction mixture slowly as a neat liquid. The color turned yellow first, then brownish green as the reaction proceeded. The reaction was monitored by TLC and at the end of 2 h, the reaction mixture was filtered through a plug of silica gel with several  $\text{CH}_2\text{Cl}_2$  washings. This operation removed

AgNTf<sub>2</sub> and ligand **8** and gave a mixture of the unreacted siloxy alkyne **2a** and the product. Unreacted siloxy alkyne was removed by heating in a Kugelrohr distillation apparatus under reduced pressure (125 °C; 3 mmHg) for 1 h. The resulting mixture was then purified by flash column chromatography (hexanes only) to give pure siloxy naphthalene **3a** (291 mg, 82%) as a colorless oil.

**(3-butyl-naphthalen-2-yloxy)triisopropylsilane 3a**: colorless oil; <sup>1</sup>H NMR (500 MHz, CDCl<sub>3</sub>): δ 7.69 (d, *J* = 7.9 Hz, 1H), 7.62 (d, *J* = 8.1 Hz, 1H), 7.56 (s, 1H), 7.34 (dt, *J* = 8.1, 1.2 Hz, 1H), 7.28 (dt, *J* = 7.5, 1.2 Hz, 1H), 7.09 (s, 1H), 2.77 (t, *J* = 7.9 Hz, 2H), 1.68-1.63 (m, 2H), 1.44-1.37 (m, 5H), 1.15 (d, *J* = 7.5 Hz, 18H), 0.95 (t, *J* = 7.4 Hz, 3H); <sup>13</sup>C NMR (125 MHz, CDCl<sub>3</sub>): δ 153.0, 135.0, 133.2, 129.0, 128.2, 127.0, 126.0, 125.1, 123.4, 112.4, 32.2, 31.1, 22.8, 18.1, 14.1, 13.1; IR (film): 2945, 2867, 1631, 1599, 1499, 1466, 1258, 929, 883 cm<sup>-1</sup>; HRMS (ESI) Calcd for (C<sub>23</sub>H<sub>36</sub>OSi)Na<sup>+</sup> (M+Na)<sup>+</sup> : 379.2428, Found: 379.2430.

Alternatively, an acidic work-up can be applied to remove the unreacted siloxy alkyne in place of the Kugelrohr distillation:

The reaction was carried out according to the Representative Procedure using phthalazine (65 mg, 0.5 mmol), AgNTf<sub>2</sub> (0.005 mmol, 1 mol%), 2,2'-bipyridine **8** (0.0055 mmol, 1.1 mol%) and siloxy alkyne **2a** (165 mg, 0.65 mmol). At the end of 2 h, the reaction mixture was diluted with 0.5 mL CH<sub>2</sub>Cl<sub>2</sub> and 0.5 mL MeOH. 25 μL TFA (trifluoroacetic acid) was added and the resulting solution was stirred under air for 15 min. It was then diluted with H<sub>2</sub>O, and the aqueous phase was extracted with CH<sub>2</sub>Cl<sub>2</sub> (3x10 mL). The combined organic phase was dried over MgSO<sub>4</sub>, filtered and concentrated *in vacuo*. Purification by flash column chromatography (hexanes only) gave pure siloxy naphthalene product **3a** (145 mg, 81%) as a colorless oil.

**Cycloaddition of Phthalazine 1a with Siloxy Alkyne 2a on a 20 mmol Scale:**

A 100-mL, oven-dried, round-bottomed flask equipped with a magnetic stir bar was charged with phthalazine **1a** (2.60 g, 20.0 mmol), 2,2'-bipyridine **8** (34.4 mg, 0.22 mmol) and AgNTf<sub>2</sub> (77.6 mg, 0.20 mmol). The flask was evacuated and refilled with nitrogen three times. Anhydrous CH<sub>2</sub>Cl<sub>2</sub> (20 mL) was added and the resulting clear, light yellow solution was stirred for 15 min under nitrogen. Siloxy alkyne **2a** (6.62 g, 26.0 mmol) was weighed in a 10-mL syringe and added to the reaction mixture slowly as a neat liquid. After a few minutes, vigorous gas evolution (N<sub>2</sub>) started and the color turned first yellow, then brownish green. The reaction was exothermic and the flask was inserted into a water bath to maintain room temperature. At the end of 3 h, the reaction mixture was filtered through silica gel (5.5 g), washed with additional CH<sub>2</sub>Cl<sub>2</sub> (100 mL) and concentrated *in vacuo* to afford a yellow-orange oil. The unreacted siloxy alkyne **2a** was removed by heating in a Kugelrohr distillation apparatus under vacuum (2 mmHg; 1.5 h at 130 °C, then 4 h at 140 °C). Flash column chromatography of the resulting mixture (eluted with hexanes only) gave pure siloxy naphthalene product **3a** (5.26 g, 74%) as a very light yellow oil.

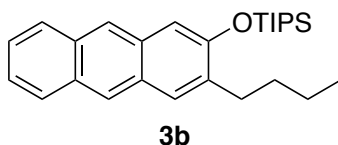

**(3-butylanthracen-2-yloxy)triisopropylsilane 3b:** Siloxy anthracene **3b** was prepared according to the Representative Procedure using benzo[g]phthalazine **1b** (90 mg, 0.5 mmol), AgNTf<sub>2</sub> (0.01 mmol, 2 mol%), 2,2'-bipyridine **8** (0.011 mmol, 2.2 mol%), siloxy alkyne **2a** (165 mg, 0.65 mmol) and CH<sub>2</sub>Cl<sub>2</sub> (2.0 mL). [The catalyst stock solution was prepared by dissolving 2,2'-bipyridine **8** (8.6 mg, 0.055 mmol) and AgNTf<sub>2</sub> (19.4 mg, 0.05 mmol) in 5.0 mL CH<sub>2</sub>Cl<sub>2</sub> and 1.0 mL of this solution was added onto benzo[g]phthalazine **1b** followed by the addition of 1.0 mL more CH<sub>2</sub>Cl<sub>2</sub>.] At the end of 1.5 h, 1.0 mL MeOH and 25 μL TFA were added to the reaction mixture and the resulting solution was stirred for 10 min. It was then diluted with H<sub>2</sub>O and the aqueous phase was extracted three times with CH<sub>2</sub>Cl<sub>2</sub>. The combined organic phase was dried over MgSO<sub>4</sub>, filtered and concentrated *in vacuo*. Purification by flash column

chromatography (hexanes only) gave pure siloxy anthracene **3b** (147 mg, 72%) as a colorless oil.

$^1\text{H}$  NMR (500 MHz,  $\text{CDCl}_3$ ):  $\delta$  8.26 (s, 1H), 8.17 (s, 1H), 7.93 (d,  $J = 8.0$  Hz, 1H), 7.90 (d,  $J = 8.2$  Hz, 1H), 7.72 (s, 1H), 7.40-7.34 (m, 2H), 7.21 (s, 1H), 2.82 (t,  $J = 7.8$  Hz, 2H), 1.74-1.68 (m, 2H), 1.49-1.40 (m, 5H), 1.18 (d,  $J = 7.5$  Hz, 18H), 0.97 (t,  $J = 7.4$  Hz, 3H);  $^{13}\text{C}$  NMR (125 MHz,  $\text{CDCl}_3$ ):  $\delta$  153.0, 136.2, 132.0, 131.5, 130.4, 128.5, 128.1, 127.8, 127.5, 125.0, 124.9, 124.1, 123.3, 110.7, 32.1, 31.4, 22.8, 18.2, 14.1, 13.1; IR (film): 2945, 2866, 1634, 1459, 1279, 1214, 1147, 901, 882  $\text{cm}^{-1}$ ; HRMS (ESI) Calcd for  $(\text{C}_{27}\text{H}_{38}\text{OSi})\text{Na}^+$  ( $\text{M}+\text{Na}$ ) $^+$ : 429.2584, Found: 429.2581.

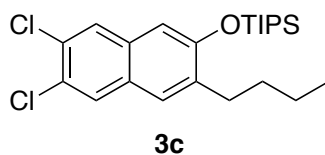

**(3-butyl-6,7-dichloronaphthalen-2-yloxy)triisopropylsilane 3c:** Siloxy naphthalene **3c** was prepared according to the Representative Procedure using phthalazine **1c** (100 mg, 0.5 mmol),  $\text{AgNTf}_2$  (0.005 mmol, 1 mol%), 2,2'-bipyridine **8** (0.0055 mmol, 1.1 mol%), siloxy alkyne **2a** (165 mg, 0.65 mmol) and  $\text{CH}_2\text{Cl}_2$  (5.0 mL). [The catalyst stock solution was prepared by dissolving 2,2'-bipyridine **8** (8.6 mg, 0.055 mmol) and  $\text{AgNTf}_2$  (19.4 mg, 0.05 mmol) in 5.0 mL  $\text{CH}_2\text{Cl}_2$  and 0.5 mL of this solution was added onto a solution of phthalazine **1c** in 4.5 mL  $\text{CH}_2\text{Cl}_2$ .] At the end of 7 h, 2.0 mL MeOH and 25  $\mu\text{L}$  TFA were added to the reaction mixture and the resulting solution was stirred for 5 min. It was then diluted with  $\text{H}_2\text{O}$  and the aqueous phase was extracted three times with  $\text{CH}_2\text{Cl}_2$ . The combined organic phase was dried over  $\text{MgSO}_4$ , filtered and concentrated *in vacuo*. Purification by flash column chromatography (hexanes only) gave pure siloxy naphthalene **3c** (167 mg, 78%) as a colorless oil.

$^1\text{H}$  NMR (500 MHz,  $\text{CDCl}_3$ ):  $\delta$  7.77 (s, 1H), 7.73 (s, 1H), 7.45 (s, 1H), 6.98 (s, 1H), 2.75 (t,  $J = 7.8$  Hz, 2H), 1.67-1.61 (m, 2H), 1.45-1.34 (m, 5H), 1.14 (d,  $J = 7.5$  Hz, 18H), 0.95 (t,  $J = 7.4$  Hz, 3H);  $^{13}\text{C}$  NMR (125 MHz,  $\text{CDCl}_3$ ):  $\delta$  154.0, 136.6, 132.3, 129.3, 128.0,

127.9, 127.2, 126.9, 111.3, 32.0, 31.1, 22.7, 18.1, 14.0, 13.1;  $^{13}\text{C}$  NMR (125 MHz,  $\text{CD}_2\text{Cl}_2$ ):  $\delta$  154.8, 137.4, 132.9, 129.5, 128.6, 128.4, 127.7, 127.5, 127.4, 111.9, 32.6, 31.6, 23.3, 18.4, 14.4, 13.6; IR (film): 2946, 2867, 1629, 1584, 1488, 1385, 1359, 1252, 933, 883, 827  $\text{cm}^{-1}$ ; HRMS (ESI) Calcd for  $(\text{C}_{23}\text{H}_{34}\text{Cl}_2\text{OSi})\text{Na}^+$  ( $\text{M}+\text{Na}$ ) $^+$  : 447.1648, Found: 447.1648.

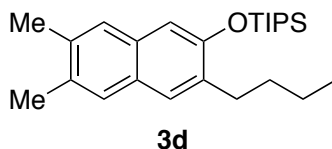

**(3-butyl-6,7-dimethylnaphthalen-2-yloxy)triisopropylsilane 3d:** Siloxy naphthalene **3d** was prepared according to the Representative Procedure using phthalazine **1d** (158 mg, 1.0 mmol),  $\text{AgNTf}_2$  (0.02 mmol, 2 mol%), 2,2'-bipyridine **8** (0.022 mmol, 2.2 mol%), siloxy alkyne **2a** (331 mg, 1.3 mmol) and  $\text{CH}_2\text{Cl}_2$  (4.0 mL). [The catalyst stock solution was prepared by dissolving 2,2'-bipyridine **8** (8.6 mg, 0.055 mmol) and  $\text{AgNTf}_2$  (19.4 mg, 0.05 mmol) in 5.0 mL  $\text{CH}_2\text{Cl}_2$  and 2.0 mL of this solution was added onto a solution of phthalazine **1d** in 2.0 mL  $\text{CH}_2\text{Cl}_2$ .] At the end of 3 h, the reaction mixture was filtered through a plug of silica gel, washed with additional  $\text{CH}_2\text{Cl}_2$  and concentrated *in vacuo*. The resulting mixture was then heated in a Kugelrohr distillation apparatus under reduced pressure (120  $^\circ\text{C}$ , 3 mmHg) for 1.5 h. Purification by flash column chromatography (hexanes only) gave pure siloxy naphthalene **3d** (325 mg, 84%) as a colorless oil.

$^1\text{H}$  NMR (500 MHz,  $\text{CDCl}_3$ ):  $\delta$  7.44 (s, 2H), 7.39 (s, 1H), 6.99 (s, 1H), 2.74 (t,  $J = 7.8$  Hz, 2H), 2.37 (s, 3H), 2.36 (s, 3H), 1.67-1.61 (m, 2H), 1.44-1.34 (m, 5H), 1.14 (d,  $J = 7.5$  Hz, 18H), 0.94 (t,  $J = 7.4$  Hz, 3H);  $^{13}\text{C}$  NMR (125 MHz,  $\text{CDCl}_3$ ):  $\delta$  152.4, 134.6, 133.9, 132.7, 132.0, 127.9, 127.2, 126.5, 125.7, 111.6, 32.3, 31.1, 22.7, 20.1, 20.0, 18.1, 14.1, 13.1; IR (film): 2944, 2867, 1640, 1610, 1499, 1466, 1388, 1372, 1253, 1208, 1147, 905, 882  $\text{cm}^{-1}$ ; HRMS (ESI) Calcd for  $(\text{C}_{25}\text{H}_{40}\text{OSi})\text{Na}^+$  ( $\text{M}+\text{Na}$ ) $^+$  : 407.2741, Found: 407.2734.

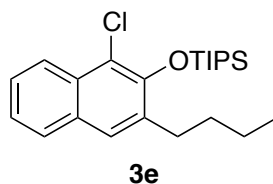

**(3-butyl-1-chloronaphthalen-2-yloxy)triisopropylsilane 3e:** Siloxy naphthalene **3e** was prepared according to the Representative Procedure using 1-chlorophthalazine (82 mg, 0.5 mmol), AgNTf<sub>2</sub> (0.01 mmol, 2 mol%), 2,2'-bipyridine **8** (0.011 mmol, 2.2 mol%), siloxy alkyne **2a** (165 mg, 0.65 mmol) and CH<sub>2</sub>Cl<sub>2</sub> (1.0 mL). [The catalyst stock solution was prepared by dissolving 2,2'-bipyridine **8** (8.6 mg, 0.055 mmol) and AgNTf<sub>2</sub> (19.4 mg, 0.05 mmol) in 5.0 mL CH<sub>2</sub>Cl<sub>2</sub> and 1.0 mL of this solution was added onto 1-chlorophthalazine.] At the end of 4 h, 1.0 mL MeOH and 2 drops of TFA were added to the reaction mixture. The resulting solution was stirred for 3 min, filtered first through basic alumina and then silica gel, washed with additional CH<sub>2</sub>Cl<sub>2</sub> and concentrated *in vacuo*. Purification by flash column chromatography (hexanes only) gave pure siloxy naphthalene **3e** (130 mg, 67%) as a colorless oil.

<sup>1</sup>H NMR (500 MHz, CDCl<sub>3</sub>): δ 8.12 (d, *J* = 8.5 Hz, 1H), 7.70 (d, *J* = 8.1 Hz, 1H), 7.51 (s, 1H), 7.47 (t, *J* = 7.7 Hz, 1H), 7.36 (t, *J* = 7.5 Hz, 1H), 2.79 (t, *J* = 7.9 Hz, 2H), 1.67 (app quin, *J* = 7.8 Hz, 2H), 1.53-1.40 (m, 5H), 1.14 (d, *J* = 7.6 Hz, 18H), 0.96 (t, *J* = 7.4 Hz, 3H); <sup>13</sup>C NMR (125 MHz, CDCl<sub>3</sub>): δ 149.8, 135.5, 130.6, 129.6, 127.2, 126.5, 126.1, 124.3, 123.6, 118.8, 32.1, 31.4, 22.7, 18.1, 14.5, 14.0; IR (film): 2946, 2867, 1596, 1441, 1362, 1256, 1151, 1115, 964, 883 cm<sup>-1</sup>; HRMS (ESI) Calcd for (C<sub>23</sub>H<sub>35</sub>ClOSi)H<sup>+</sup> (M+H)<sup>+</sup> : 391.2218, Found: 391.2217.

**Discussion on the Regiochemistry of the Siloxy Naphthalene 3e:** In order to determine the regiochemistry of **3e**, the corresponding brominated analog **21** was prepared by the electrophilic bromination of **3a** according to the procedure shown below. In the <sup>1</sup>H-NMR of **3a**, the two singlets at 7.56 and 7.09 ppm were assigned as the signals of H<sub>a</sub> and H<sub>b</sub>, respectively, based on the regular electronic considerations. The latter signal (7.09 ppm) disappeared upon bromination of **3a** supporting that the electrophilic substitution took place at the 1- position. This is in accord with the known reactivity of 2-naphthols in

electrophilic aromatic substitution reactions. The  $^1\text{H}$ - and  $^{13}\text{C}$ -NMR spectra of **3e** and **21** exhibit close similarities in terms of the signal pattern and chemical shifts.

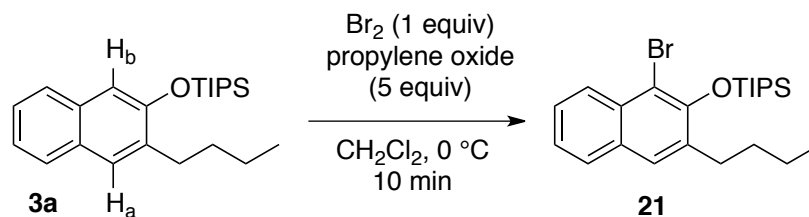

**(1-bromo-3-butyl-naphthalen-2-yloxy)triisopropylsilane 21**: The following procedure was adapted from the work of Corey and co-workers.<sup>15</sup> To a solution of the siloxy naphthalene **3a** (40 mg, 0.11 mmol) in 0.5 mL of anhydrous  $\text{CH}_2\text{Cl}_2$  was added propylene oxide (39  $\mu\text{L}$ , 0.56 mmol). The resulting clear solution was cooled to 0  $^\circ\text{C}$  and 0.5 M  $\text{Br}_2$  in  $\text{CCl}_4$  (225  $\mu\text{L}$ , 0.11 mmol) was added dropwise. The resulting light yellow solution was stirred for 10 min at the same temperature and then filtered through a pad of silica gel with several washings with hexanes. Removal of all volatiles *in vacuo* afforded the product (46 mg, 94%) as a colorless oil.

$^1\text{H}$  NMR (500 MHz,  $\text{CDCl}_3$ ):  $\delta$  8.14 (d,  $J = 8.6$  Hz, 1H), 7.69 (d,  $J = 8.1$  Hz, 1H), 7.55 (s, 1H), 7.47 (dt,  $J = 7.6, 1.0$  Hz, 1H), 7.36 (t,  $J = 7.5$  Hz, 1H), 2.81 (t,  $J = 7.9$  Hz, 2H), 1.71-1.64 (m, 2H), 1.54 (sept,  $J = 7.7$  Hz, 3H), 1.43 (sext,  $J = 7.5$  Hz, 2H), 1.15 (d,  $J = 7.6$  Hz, 18H), 0.96 (t,  $J = 7.4$  Hz, 3H);  $^{13}\text{C}$  NMR (125 MHz,  $\text{CDCl}_3$ ):  $\delta$  151.3, 135.5, 132.0, 130.0, 127.4, 127.3, 126.5, 126.4, 124.3, 112.0, 32.1, 31.6, 22.7, 18.1, 14.6, 14.1; IR (film): 2946, 2867, 1558, 1450, 1360, 1251, 1151, 1018, 954, 883  $\text{cm}^{-1}$ ; HRMS (ESI) Calcd for  $(\text{C}_{23}\text{H}_{35}\text{BrOSi})\text{Na}^+$  ( $\text{M}+\text{Na}$ ) $^+$ : 457.1533, Found: 457.1526.

<sup>15</sup> Liang, H.; Hu, L.; Corey, E. J. *Org. Lett.* **2011**, *13*, 4120-4123.



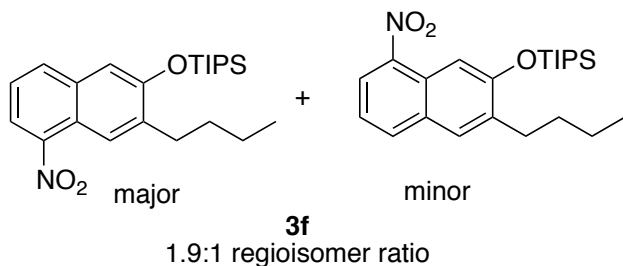

Prepared according to the Representative Procedure using 5-nitrophthalazine **1f** (88 mg, 0.5 mmol), AgNTf<sub>2</sub> (0.01 mmol, 2 mol%), 2,2'-bipyridine **8** (0.011 mmol, 2.2 mol%), siloxy alkyne **2a** (165 mg, 0.65 mmol) and CH<sub>2</sub>Cl<sub>2</sub> (2.0 mL). [The catalyst stock solution was prepared by dissolving 2,2'-bipyridine **8** (8.6 mg, 0.055 mmol) and AgNTf<sub>2</sub> (19.4 mg, 0.05 mmol) in 5.0 mL CH<sub>2</sub>Cl<sub>2</sub> and 1.0 mL of this solution was added onto a mixture of 5-nitrophthalazine **1f** and 1.0 mL CH<sub>2</sub>Cl<sub>2</sub>.] At the end of 4 h, the reaction mixture was filtered through a plug of silica gel, washed with additional CH<sub>2</sub>Cl<sub>2</sub> and concentrated *in vacuo*. It was then heated in a Kugelrohr distillation apparatus under reduced pressure (3 mmHg; 120 °C) for 2 h. Purification by flash column chromatography (hexanes to 0.5% EtOAc in hexanes) gave siloxy naphthalene product **3f** (149 mg, 74%) as a 1.9:1 regioisomeric mixture (yellow oil).

<sup>13</sup>C NMR (125 MHz, CDCl<sub>3</sub>): δ 156.7, 154.0, 146.2, 144.3, 139.3, 136.6, 134.8, 134.3, 132.6, 130.4, 129.1, 125.6, 124.4, 123.7, 123.4, 121.6, 121.4, 120.6, 112.9, 108.3, 32.1, 31.8, 31.7, 30.8, 22.8, 22.7, 18.08, 18.06, 14.0, 13.0, 12.9; IR (film): 2947, 2868, 1631, 1604, 1522, 1462, 1326, 1271, 1135, 997, 882, 804 cm<sup>-1</sup>; HRMS (ESI) Calcd for (C<sub>23</sub>H<sub>35</sub>NO<sub>3</sub>Si)Na<sup>+</sup> (M+Na)<sup>+</sup>: 424.2278, Found: 424.2277.

**Major regioisomer:**

<sup>1</sup>H NMR (500 MHz, CDCl<sub>3</sub>): δ 8.33 (s, 1H), 8.04 (dd, *J* = 7.6, 0.9 Hz, 1H), 7.88 (d, *J* = 8.2 Hz, 1H), 7.39 (t, *J* = 7.9 Hz, 1H), 7.18 (s, 1H), 2.83 (t, *J* = 7.8 Hz, 2H), 1.69-1.65 (m, 2H), 1.48-1.38 (m, 5H), 1.16 (d, *J* = 7.5 Hz, 18H), 0.96 (t, *J* = 7.4 Hz, 3H).

**Minor regioisomer:**

<sup>1</sup>H NMR (500 MHz, CDCl<sub>3</sub>): δ 8.26 (dd, *J* = 7.7, 1.0 Hz, 1H), 8.13 (s, 1H), 7.98 (d, *J* = 8.1 Hz, 1H), 7.67 (s, 1H), 7.33 (t, *J* = 7.9 Hz, 1H), 2.80 (t, *J* = 7.9 Hz, 2H), 1.69-1.65 (m, 2H), 1.48-1.38 (m, 5H), 1.17 (d, *J* = 7.5 Hz, 18H), 0.96 (t, *J* = 7.4 Hz, 3H).

**Discussion on the Regiochemistry of the Major and Minor Isomers of 3f:** The regioisomeric mixture **3f** was desilylated according to the procedure shown below and the resulting 2-naphthol products **22** (major) and **23** (minor) were separated by flash column chromatography. The isolated yields for these products (62% and 33%) reflected well the regioisomer ratio (1.9:1) of **3f**. NOESY spectra of both compounds were recorded and the key NOEs shown below by the curved arrows support the structural assignments of these regioisomers.<sup>16</sup>

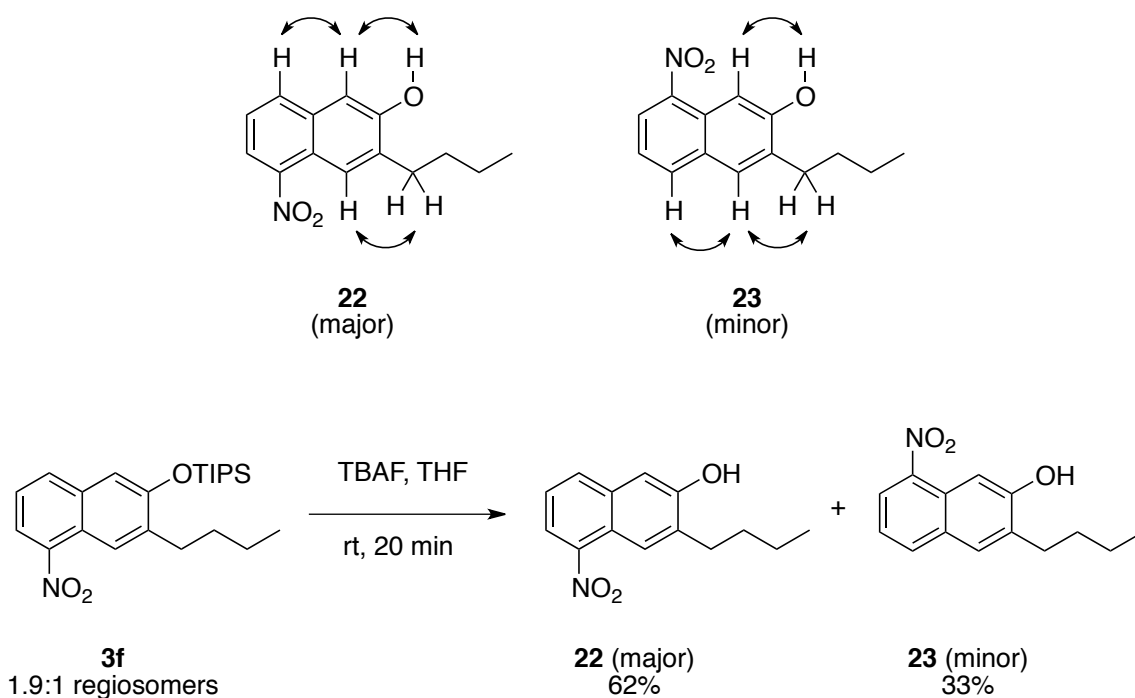

To a solution of the regioisomeric mixture **3f** (119 mg, 0.3 mmol) in 5 mL of anhydrous THF was added TBAF (0.44 mL, 0.44 mmol, 1.0 M in THF) at room temperature, under nitrogen. The bright yellow solution immediately turned dark blue upon addition of TBAF. The reaction mixture was stirred for 20 min at which time TLC analysis indicated full consumption of the starting material. It was then quenched with saturated  $\text{NH}_4\text{Cl}$  solution (10 mL) and the color turned back to bright yellow. The mixture was diluted with  $\text{H}_2\text{O}$  (5 mL) and the aqueous phase was extracted with EtOAc (3x15 mL). The combined organic phase was dried over  $\text{MgSO}_4$ , filtered and concentrated *in vacuo* to afford a yellow oil. Purification by flash column chromatography (hexanes to 2% to 5%

<sup>16</sup> For the NOESY spectra of **22** and **23**, see pages S-59 and S-62, respectively.

to 10% to 20% EtOAc in hexanes) gave pure 2-naphthol derivatives **22** (45 mg, 62%, major regioisomer) and **23** (24 mg, 33%, minor regioisomer) as yellow solids.

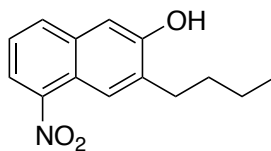**22**

**3-butyl-5-nitronaphthalen-2-ol 22:**

mp 108-109 °C;  $R_f = 0.12$  (10% EtOAc in hexanes);  $^1\text{H NMR}$  (500 MHz,  $\text{CDCl}_3$ ):  $\delta$  8.34 (s, 1H), 8.05 (dd,  $J = 7.6, 1.1$  Hz, 1H), 7.88 (d,  $J = 8.2$  Hz, 1H), 7.40 (t,  $J = 7.9$  Hz, 1H), 7.19 (s, 1H), 5.41 (s, 1H), 2.83 (t,  $J = 7.7$  Hz, 2H), 1.73-1.67 (m, 2H), 1.44 (sext,  $J = 7.5$  Hz, 2H), 0.97 (t,  $J = 7.4$  Hz, 3H);  $^{13}\text{C NMR}$  (125 MHz,  $\text{CDCl}_3$ ):  $\delta$  153.5, 146.2, 135.3, 134.7, 132.5, 124.0, 123.8, 121.7, 120.7, 110.0, 31.7, 30.7, 22.6, 13.9; IR (film): 3388 (br s), 2951, 2861, 1630, 1606, 1516, 1462, 1307, 1186, 1123, 981  $\text{cm}^{-1}$ ; HRMS (ESI) Calcd for  $(\text{C}_{14}\text{H}_{14}\text{NO}_3)^-$  (M-H) $^-$ : 244.0979, Found: 244.0984.

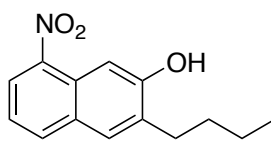**23**

**3-butyl-8-nitronaphthalen-2-ol 23:**

mp 129-130 °C;  $R_f = 0.41$  (10% EtOAc in hexanes);  $^1\text{H NMR}$  (500 MHz,  $\text{CDCl}_3$ ):  $\delta$  8.28 (dd,  $J = 7.8, 1.2$  Hz, 1H), 8.13 (s, 1H), 8.01 (d,  $J = 8.1$  Hz, 1H), 7.69 (s, 1H), 7.35 (t,  $J = 7.9$  Hz, 1H), 6.03 (s, 1H), 2.82 (t,  $J = 7.7$  Hz, 2H), 1.74-1.68 (m, 2H), 1.44 (sext,  $J = 7.6$  Hz, 2H), 0.98 (t,  $J = 7.4$  Hz, 3H);  $^{13}\text{C NMR}$  (125 MHz,  $\text{CDCl}_3$ ):  $\delta$  156.4, 144.1, 134.7, 133.3, 130.5, 129.5, 125.6, 124.7, 121.4, 105.4, 31.4, 30.0, 22.6, 14.0; IR (film): 3411 (br s), 2924, 2866, 1634, 1503, 1464, 1444, 1323, 1214  $\text{cm}^{-1}$ ; HRMS (ESI) Calcd for  $(\text{C}_{14}\text{H}_{14}\text{NO}_3)^-$  (M-H) $^-$ : 244.0979, Found: 244.0988.

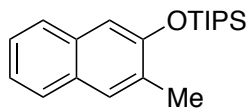**3g**

**Triisopropyl(3-methylnaphthalen-2-yloxy)silane 3g:** Siloxy naphthalene **3g** was prepared according to the Representative Procedure using phthalazine **1a** (65 mg, 0.5 mmol), AgNTf<sub>2</sub> (0.01 mmol, 2 mol%), 2,2'-bipyridine **8** (0.011 mmol, 2.2 mol%), siloxy alkyne **2g** (212 mg, 1.0 mmol) and CH<sub>2</sub>Cl<sub>2</sub> (1.5 mL). [The catalyst stock solution was prepared by dissolving 2,2'-bipyridine **8** (8.6 mg, 0.055 mmol) and AgNTf<sub>2</sub> (19.4 mg, 0.05 mmol) in 5.0 mL CH<sub>2</sub>Cl<sub>2</sub> and 0.5 mL of this solution was added onto a solution of phthalazine **1a** in 0.5 mL CH<sub>2</sub>Cl<sub>2</sub>. After 1.5 h, 0.5 mL more catalyst stock solution was added resulting in a total of 2 mol% catalyst loading.] At the end of 3 h, the reaction mixture was filtered through a plug of silica gel, washed with additional CH<sub>2</sub>Cl<sub>2</sub> and concentrated *in vacuo*. The resulting mixture was then heated in a Kugelrohr distillation apparatus under reduced pressure (75 °C; 1 mmHg) for 2 h. Purification by flash column chromatography (hexanes only) gave pure siloxy naphthalene **3g** (115 mg, 73%) as a colorless oil.

<sup>1</sup>H NMR (500 MHz, CDCl<sub>3</sub>): δ 7.67 (d, *J* = 8.1 Hz, 1H), 7.62 (d, *J* = 8.2 Hz, 1H), 7.58 (s, 1H), 7.34 (t, *J* = 7.5 Hz, 1H), 7.28 (dt, *J* = 7.4, 0.9 Hz, 1H), 7.10 (s, 1H), 2.40 (s, 3H), 1.39 (sept, *J* = 7.5 Hz, 3H), 1.15 (d, *J* = 7.5 Hz, 18H); <sup>13</sup>C NMR (125 MHz, CDCl<sub>3</sub>): δ 153.3, 133.3, 130.6, 129.1, 128.9, 126.8, 126.1, 125.1, 123.4, 112.4, 18.1, 17.8, 13.0; IR (film): 2945, 2867, 1631, 1601, 1501, 1467, 1333, 1260, 1180, 1161, 1109, 929, 881 cm<sup>-1</sup>; HRMS (ESI) Calcd for (C<sub>20</sub>H<sub>30</sub>OSi)H<sup>+</sup> (M+H)<sup>+</sup>: 315.2139, Found: 315.2143.

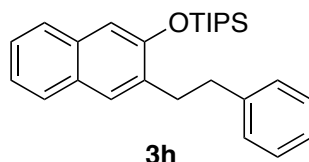**3h**

**Triisopropyl(3-phenethylnaphthalen-2-yloxy)silane 3h:** Siloxy naphthalene **3h** was prepared according to the Representative Procedure using phthalazine **1a** (65 mg, 0.5 mmol), AgNTf<sub>2</sub> (0.01 mmol, 2 mol%), 2,2'-bipyridine **8** (0.011 mmol, 2.2 mol%), siloxy

alkyne **2h** (227 mg, 0.75 mmol) and CH<sub>2</sub>Cl<sub>2</sub> (1.0 mL). [The catalyst stock solution was prepared by dissolving 2,2'-bipyridine **8** (8.6 mg, 0.055 mmol) and AgNTf<sub>2</sub> (19.4 mg, 0.05 mmol) in 5.0 mL CH<sub>2</sub>Cl<sub>2</sub> and 1.0 mL of this solution was added onto phthalazine **1a**.] At the end of 1 h, the reaction mixture was filtered through a plug of silica gel, washed with additional CH<sub>2</sub>Cl<sub>2</sub> and concentrated *in vacuo*. The sulting mixture was then heated in a Kugelrohr distillation apparatus under reduced pressure (1 mmHg; at 150 °C for 45 min, then 200 °C for 1.5 h). Purification by flash column chromatography (hexanes only) gave pure siloxy naphthalene **3h** (141 mg, 70%) as a colorless oil.

<sup>1</sup>H NMR (500 MHz, CDCl<sub>3</sub>): δ 7.67 (d, *J* = 8.1 Hz, 1H), 7.64 (d, *J* = 8.2 Hz, 1H), 7.53 (s, 1H), 7.36 (dt, *J* = 7.5, 1.2 Hz, 1H), 7.28 (app t, *J* = 7.7 Hz, 3H), 7.24-7.18 (m, 3H), 7.14 (s, 1 H), 3.12-3.08 (m, 2H), 3.01-2.97 (m, 2H), 1.43 (sept, *J* = 7.5 Hz, 3H), 1.17 (d, *J* = 7.5 Hz, 18H); <sup>13</sup>C NMR (125 MHz, CDCl<sub>3</sub>): δ 152.9, 142.2, 133.8, 133.4, 129.0, 128.7, 128.5, 128.3, 127.1, 126.1, 125.8, 125.3, 123.5, 112.5, 36.5, 33.3, 18.2, 13.2; IR (film): 2945, 2866, 1631, 1600, 1499, 1466, 1388, 1363, 1335, 1258, 1180, 1104, 929, 882 cm<sup>-1</sup>; HRMS (ESI) Calcd for (C<sub>27</sub>H<sub>36</sub>OSi)Na<sup>+</sup> (M+Na)<sup>+</sup>: 427.2428, Found: 427.2434.

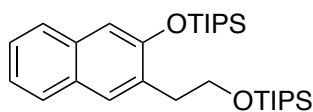**3i**

**Triisopropyl(3-(2-(triisopropylsilyloxy)ethyl)naphthalen-2-yloxy)silane 3i:** Siloxy naphthalene **3i** was prepared according to the Representative Procedure using phthalazine **1a** (65 mg, 0.5 mmol), AgNTf<sub>2</sub> (0.005 mmol, 1 mol%), 2,2'-bipyridine **8** (0.0055 mmol, 1.1 mol%), siloxy alkyne **2i** (259 mg, 0.65 mmol) and CH<sub>2</sub>Cl<sub>2</sub> (0.5 mL). [The catalyst stock solution was prepared by dissolving 2,2'-bipyridine **8** (8.6 mg, 0.055 mmol) and AgNTf<sub>2</sub> (19.4 mg, 0.05 mmol) in 5.0 mL CH<sub>2</sub>Cl<sub>2</sub> and 0.5 mL of this solution was added onto phthalazine **1a**.] At the end of 1 h, the reaction mixture was filtered through a plug of silica gel, washed with additional CH<sub>2</sub>Cl<sub>2</sub> and concentrated *in vacuo*. Purification by flash column chromatography (hexanes to 2% EtOAc in hexanes) gave pure siloxy naphthalene **3i** (204 mg, 81%) as a colorless oil.

$^1\text{H}$  NMR (500 MHz,  $\text{CDCl}_3$ ):  $\delta$  7.69 (d,  $J = 8.1$  Hz, 1H), 7.65 (s, 1H), 7.62 (d,  $J = 8.1$  Hz, 1H), 7.35 (dt,  $J = 7.5$ , 1.1 Hz, 1H), 7.28 (dt,  $J = 7.5$ , 1.0 Hz, 1H), 7.10 (s, 1H), 3.96 (t,  $J = 7.1$  Hz, 2H), 3.05 (t,  $J = 7.1$  Hz, 2H), 1.40 (sept,  $J = 7.5$  Hz, 3H), 1.15 (d,  $J = 7.5$  Hz, 18H), 1.08-1.01 (m, 21H);  $^{13}\text{C}$  NMR (125 MHz,  $\text{CDCl}_3$ ):  $\delta$  152.9, 133.4, 131.1, 129.7, 129.0, 127.1, 126.0, 125.3, 123.4, 112.4, 63.3, 35.0, 18.1, 18.0, 13.1, 12.0; IR (film): 2944, 2866, 1633, 1600, 1500, 1466, 1387, 1258, 1180, 1158, 1110, 929, 883  $\text{cm}^{-1}$ ; HRMS (ESI) Calcd for  $(\text{C}_{30}\text{H}_{52}\text{O}_2\text{Si}_2)\text{Na}^+$  ( $\text{M}+\text{Na}$ ) $^+$ : 523.3398, Found: 523.3379.

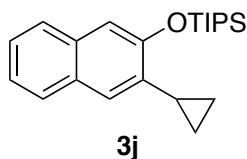

**(3-cyclopropylnaphthalen-2-yloxy)triisopropylsilane 3j:** Siloxy naphthalene **3j** was prepared according to the Representative Procedure using phthalazine **1a** (65 mg, 0.5 mmol),  $\text{AgNTf}_2$  (0.01 mmol, 2 mol%), 2,2'-bipyridine **8** (0.011 mmol, 2.2 mol%), siloxy alkyne **2j** (238 mg, 1.0 mmol) and  $\text{CH}_2\text{Cl}_2$  (1.0 mL). [The catalyst stock solution was prepared by dissolving 2,2'-bipyridine **8** (8.6 mg, 0.055 mmol) and  $\text{AgNTf}_2$  (19.4 mg, 0.05 mmol) in 5.0 mL  $\text{CH}_2\text{Cl}_2$  and 1.0 mL of this solution was added onto phthalazine **1a**.] At the end of 3 h, the reaction mixture was filtered through a plug of silica gel, washed with additional  $\text{CH}_2\text{Cl}_2$  and concentrated *in vacuo*. The resulting mixture was then heated in a Kugelrohr distillation apparatus under reduced pressure (1 mmHg; at 75 °C for 30 min, then 115 °C for 1 h). Purification by flash column chromatography (hexanes only) gave pure siloxy naphthalene **3j** (128 mg, 75%) as a colorless oil.

$^1\text{H}$  NMR (500 MHz,  $\text{CD}_2\text{Cl}_2$ ):  $\delta$  7.66 (d,  $J = 8.0$  Hz, 1H), 7.62 (d,  $J = 8.0$  Hz, 1H), 7.33 (dt,  $J = 7.4$ , 1.2 Hz, 1H), 7.29 (s, 1H), 7.26 (dt,  $J = 7.5$ , 1.1 Hz, 1H), 7.13 (s, 1H), 2.34-2.29 (m, 1H), 1.43 (sept,  $J = 7.5$  Hz, 3H), 1.17 (d,  $J = 7.5$  Hz, 18H), 1.01-0.97 (m, 2H), 0.77-0.73 (m, 2H);  $^{13}\text{C}$  NMR (125 MHz,  $\text{CDCl}_3$ ):  $\delta$  153.8, 135.9, 132.9, 129.0, 127.0, 126.0, 125.1, 123.6, 123.4, 112.4, 18.1, 13.1, 10.9, 8.0; IR (film): 2945, 2867, 1632, 1600, 1498, 1472, 1449, 1334, 1261, 1179, 1051, 930, 883  $\text{cm}^{-1}$ ; HRMS (ESI) Calcd for  $(\text{C}_{22}\text{H}_{32}\text{OSi})\text{Na}^+$  ( $\text{M}+\text{Na}$ ) $^+$ : 363.2115, Found: 363.2119.

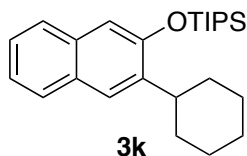

**(3-cyclohexylnaphthalen-2-yloxy)triisopropylsilane 3k:** Siloxy naphthalene **3k** was prepared according to the Representative Procedure using phthalazine **1a** (65 mg, 0.5 mmol), AgNTf<sub>2</sub> (0.01 mmol, 2 mol%), 2,2'-bipyridine **8** (0.011 mmol, 2.2 mol%), siloxy alkyne **2k** (210 mg, 0.75 mmol) and CH<sub>2</sub>Cl<sub>2</sub> (1.0 mL). [The catalyst stock solution was prepared by dissolving 2,2'-bipyridine **8** (8.6 mg, 0.055 mmol) and AgNTf<sub>2</sub> (19.4 mg, 0.05 mmol) in 5.0 mL CH<sub>2</sub>Cl<sub>2</sub> and 1.0 mL of this solution was added onto phthalazine **1a**.] At the end of 3 h, the reaction mixture was filtered through a plug of silica gel, washed with additional CH<sub>2</sub>Cl<sub>2</sub> and concentrated *in vacuo*. The resulting mixture was then heated in a Kugelrohr distillation apparatus under reduced pressure (120 °C; 2 mmHg) for 1 h. Purification by flash column chromatography (hexanes only) gave pure siloxy naphthalene **3k** (158 mg, 83%) as a colorless oil, which solidified upon standing in the refrigerator to form a white solid.

mp: 65-66 °C; <sup>1</sup>H NMR (500 MHz, CDCl<sub>3</sub>): δ 7.71 (d, *J* = 8.1 Hz, 1H), 7.61 (d, *J* = 8.1 Hz, 1H), 7.59 (s, 1H), 7.34 (dt, *J* = 7.5, 1.2 Hz, 1H), 7.27 (dt, *J* = 7.5, 1.1 Hz, 1H), 7.09 (s, 1H), 3.10 (br t, 1H), 1.98 (br d, 2H), 1.87 (br s, 2H), 1.78 (br d, *J* = 12.7 Hz, 1H), 1.49-1.37 (m, 7H), 1.34-1.25 (m, 1H), 1.16 (d, *J* = 7.5 Hz, 18H); <sup>13</sup>C NMR (125 MHz, CDCl<sub>3</sub>): δ 152.4, 139.8, 132.8, 129.1, 127.2, 125.9, 125.2, 125.1, 123.3, 112.3, 37.5, 33.5, 27.2, 26.5, 18.2, 13.1; IR (film): 2926, 2866, 1631, 1599, 1497, 1466, 1389, 1252, 1179, 1101, 1001, 929, 882 cm<sup>-1</sup>; HRMS (ESI) Calcd for (C<sub>25</sub>H<sub>38</sub>OSi)Na<sup>+</sup> (M+Na)<sup>+</sup>: 405.2584, Found: 405.2575.

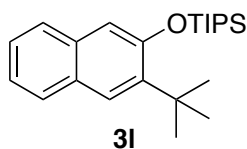

**(3-tert-butyl-naphthalen-2-yloxy)triisopropylsilane 3l:** A test tube charged with phthalazine **1a** (65 mg, 0.5 mmol), 2,2'-bipyridine **8** (8.6 mg, 0.055 mmol) and AgNTf<sub>2</sub> (19.4 mg, 0.05 mmol) was evacuated and refilled with nitrogen three times. 0.5 mL of

anhydrous  $\text{CH}_2\text{Cl}_2$  was added and the resulting clear, light yellow solution was stirred for 15 min under nitrogen. Siloxy alkyne **2I** (255 mg, 1.0 mmol) was weighed in a 1.0-mL syringe and added to the reaction mixture slowly as a neat liquid. The reaction mixture was stirred at room temperature, under nitrogen for 22 h. It was then filtered through a plug of silica gel, washed with additional  $\text{CH}_2\text{Cl}_2$  and concentrated *in vacuo* to afford a yellow-orange oil. Purification by flash column chromatography (hexanes only) gave pure siloxy naphthalene **3I** (120 mg, 67%) as a colorless oil, which solidified upon standing to form a white solid.

The same reaction was performed once more using phthalazine **1a** (65 mg, 0.5 mmol), 2,2'-bipyridine **8** (8.6 mg, 0.055 mmol),  $\text{AgNTf}_2$  (19.4 mg, 0.05 mmol), siloxy alkyne **2I** (255 mg, 1.0 mmol) and anhydrous  $\text{CH}_2\text{Cl}_2$  (0.5 mL) according to the procedure described above. The reaction mixture was stirred in refluxing  $\text{CH}_2\text{Cl}_2$  (45 °C) for 7 h. It was then filtered through a plug of silica gel, washed with additional  $\text{CH}_2\text{Cl}_2$  and concentrated *in vacuo* to afford an orange oil. Purification by flash column chromatography (hexanes only) gave pure siloxy naphthalene **3I** (142 mg, 80%) as a colorless oil, which solidified upon standing to form a white solid.

#### **Cycloaddition of Phthalazine 1a with Siloxy Alkyne 2I on a 10 mmol Scale:**

A 50-mL, oven-dried, single-necked, round-bottomed flask equipped with a magnetic stir bar was charged with phthalazine **1a** (1.30 g, 10.0 mmol), 2,2'-bipyridine **8** (171.8 mg, 1.1 mmol) and  $\text{AgNTf}_2$  (388.0 mg, 1.0 mmol). The flask was evacuated under vacuum for 5 min and refilled with nitrogen. 10 mL of anhydrous  $\text{CH}_2\text{Cl}_2$  was added and the resulting clear, light yellow solution was stirred for 15 min under nitrogen. Siloxy alkyne **2I** (3.82 g, 15.0 mmol) was weighed in a 10-mL syringe and added to the reaction mixture slowly as a neat liquid. The resulting clear, yellow solution was stirred at room temperature for 10 min. The reaction flask was then quickly fitted with a reflux condenser and inserted into a preheated oil bath at 45 °C. The reaction mixture was stirred in refluxing  $\text{CH}_2\text{Cl}_2$ , under nitrogen for 10 h during which time the color first turned green and then brown. The reaction mixture was filtered through silica gel (6 g),



washed with additional CH<sub>2</sub>Cl<sub>2</sub> (120 mL) and concentrated *in vacuo* to afford an orange-brown oil. Flash column chromatography of the resulting mixture (hexanes only) gave pure siloxy naphthalene **3l** (2.97 g, 83%) as a white solid.

mp: 59-60 °C; <sup>1</sup>H NMR (500 MHz, CDCl<sub>3</sub>): δ 7.77 (d, *J* = 8.2 Hz, 1H), 7.75 (s, 1H), 7.64 (d, *J* = 8.1 Hz, 1H), 7.39 (dt, *J* = 7.4, 1.0 Hz, 1H), 7.32 (dt, *J* = 7.5, 1.0 Hz, 1H), 7.13 (s, 1H), 1.56-1.50 (m, 12H), 1.23 (d, *J* = 7.5 Hz, 18H); <sup>13</sup>C NMR (125 MHz, CDCl<sub>3</sub>): δ 153.7, 140.9, 132.9, 128.7, 127.5, 125.7, 125.44, 125.39, 123.4, 113.2, 35.3, 29.9, 18.3, 113.4; IR (film): 2947, 2868, 1632, 1594, 1464, 1330, 1253, 1215, 1184, 1059, 926, 882, 871, 822 cm<sup>-1</sup>; HRMS (ESI) Calcd for (C<sub>23</sub>H<sub>36</sub>OSi)Na<sup>+</sup> (M+Na)<sup>+</sup>: 379.2428, Found: 379.2425.

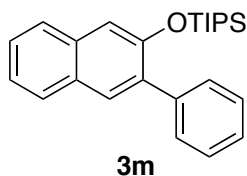

**Triisopropyl(3-phenylnaphthalen-2-yloxy)silane 3m:** Siloxy naphthalene **3m** was prepared according to the Representative Procedure using phthalazine **1a** (130 mg, 1.0 mmol), AgNTf<sub>2</sub> (0.01 mmol, 1 mol%), 2,2'-bipyridine **8** (0.011 mmol, 1.1 mol%), siloxy alkyne **2m** (357 mg, 1.3 mmol) and CH<sub>2</sub>Cl<sub>2</sub> (1.0 mL). [The catalyst stock solution was prepared by dissolving 2,2'-bipyridine **8** (8.6 mg, 0.055 mmol) and AgNTf<sub>2</sub> (19.4 mg, 0.05 mmol) in 5.0 mL CH<sub>2</sub>Cl<sub>2</sub> and 1.0 mL of this solution was added onto phthalazine **1a**.] At the end of 1 h, the reaction mixture was filtered through a plug of silica gel, washed with additional CH<sub>2</sub>Cl<sub>2</sub> and concentrated *in vacuo*. The resulting mixture was then heated in a Kugelrohr distillation apparatus under reduced pressure (170 °C; 1 mmHg) for 1 h. Purification by flash column chromatography (hexanes only) gave pure siloxy naphthalene **3m** (357 mg, 95%) as a light yellow oil, which solidified upon standing in the refrigerator to form a white solid.

This reaction was performed according to the above procedure using phthalazine **1a** (130 mg, 1.0 mmol), AgNTf<sub>2</sub> (0.005 mmol, 0.5 mol%), 2,2'-bipyridine **8** (0.0055 mmol, 0.55 mol%), siloxy alkyne **2m** (357 mg, 1.3 mmol) and CH<sub>2</sub>Cl<sub>2</sub> (1.0 mL) (Reaction time = 3

h). Purification by flash column chromatography (hexanes only) gave pure siloxy naphthalene **3m** (347 mg, 92%) as a light yellow oil.

mp: 57-58 °C;  $^1\text{H}$  NMR (500 MHz,  $\text{CDCl}_3$ ):  $\delta$  7.77 (d,  $J = 8.1$  Hz, 1H), 7.75 (s, 1H), 7.69 (d,  $J = 8.2$  Hz, 1H), 7.57 (d,  $J = 7.0$  Hz, 2H), 7.43-7.39 (m, 3H), 7.33 (dt,  $J = 7.7, 1.1$  Hz, 2H), 7.24 (s, 1H), 1.20 (sept,  $J = 7.5$  Hz, 3H), 0.99 (d,  $J = 7.5$  Hz, 18H);  $^{13}\text{C}$  NMR (125 MHz,  $\text{CDCl}_3$ ):  $\delta$  151.7, 139.1, 134.9, 133.9, 129.90, 129.85, 129.1, 127.7, 127.6, 126.9, 126.1, 126.0, 123.8, 113.8, 17.9, 12.9; IR (film): 3056, 2945, 2866, 1630, 1595, 1502, 1493, 1462, 1437, 1356, 1336, 1277, 1267, 1246, 1201, 1179, 992, 929, 882, 857  $\text{cm}^{-1}$ ; HRMS (ESI) Calcd for  $(\text{C}_{25}\text{H}_{32}\text{OSi})\text{Na}^+$  ( $\text{M}+\text{Na}$ ) $^+$ : 399.2115, Found: 399.2117.

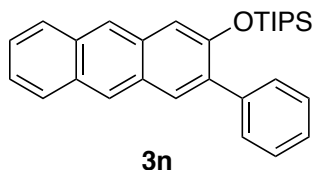

**Triisopropyl(3-phenylanthracen-2-yloxy)silane 3n:** Siloxy anthracene **3n** was prepared according to the Representative Procedure using benzo[g]phthalazine **1b** (180 mg, 1.0 mmol),  $\text{AgNTf}_2$  (0.01 mmol, 1 mol%), 2,2'-bipyridine **8** (0.011 mmol, 1.1 mol%), siloxy alkyne **2m** (357 mg, 1.3 mmol) and  $\text{CH}_2\text{Cl}_2$  (3.0 mL). [The catalyst stock solution was prepared by dissolving 2,2'-bipyridine **8** (8.6 mg, 0.055 mmol) and  $\text{AgNTf}_2$  (19.4 mg, 0.05 mmol) in 5.0 mL  $\text{CH}_2\text{Cl}_2$  and 1.0 mL of this solution was added onto the solution of benzo[g]phthalazine **1b** in 2.0 mL  $\text{CH}_2\text{Cl}_2$ .] At the end of 3 h, the reaction mixture was filtered through a plug of silica gel, washed with additional  $\text{CH}_2\text{Cl}_2$  and concentrated *in vacuo*. Purification by flash column chromatography (hexanes only) gave pure siloxy anthracene **3n** (356 mg, 84%) as a yellow oil.

$^1\text{H}$  NMR (500 MHz,  $\text{CDCl}_3$ ):  $\delta$  8.35 (s, 1H), 8.24 (s, 1H), 7.94 (t,  $J = 8.0$  Hz, 2H), 7.92 (s, 1H), 7.61 (d,  $J = 7.2$  Hz, 2H), 7.44-7.34 (m, 6H), 1.25 (sept,  $J = 7.6$  Hz, 3H), 1.01 (d,  $J = 7.5$  Hz, 18H);  $^{13}\text{C}$  NMR (125 MHz,  $\text{CDCl}_3$ ):  $\delta$  151.6, 139.0, 136.1, 132.3, 132.0, 130.6, 129.9, 128.4, 128.2, 127.8, 127.6, 127.1, 126.1, 125.4, 124.4, 123.5, 112.2, 17.9, 12.9;  $^{13}\text{C}$  NMR (125 MHz,  $\text{CD}_2\text{Cl}_2$ ):  $\delta$  152.2, 139.6, 136.7, 132.9, 132.6, 131.2, 130.5,

130.4, 129.0, 128.7, 128.4, 128.1, 127.7, 126.6, 126.0, 125.1, 124.0, 112.8, 18.3, 13.5; IR (film): 2944, 2866, 1629, 1457, 1436, 1293, 1212, 1175, 994, 900, 884  $\text{cm}^{-1}$ ; HRMS (ESI) Calcd for  $(\text{C}_{29}\text{H}_{34}\text{OSi})\text{Na}^+$  ( $\text{M}+\text{Na}$ ) $^+$ : 449.2271, Found: 449.2263.

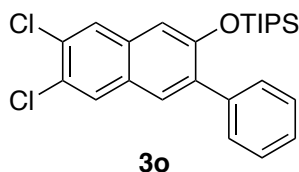

**(6,7-dichloro-3-phenylnaphthalen-2-yloxy)triisopropylsilane 3o**: Siloxy naphthalene **3o** was prepared according to the Representative Procedure using 6,7-dichlorophthalazine **1c** (100 mg, 0.5 mmol),  $\text{AgNTf}_2$  (0.005 mmol, 1 mol%), 2,2'-bipyridine **8** (0.0055 mmol, 1.1 mol%), siloxy alkyne **2m** (178 mg, 0.65 mmol) and  $\text{CH}_2\text{Cl}_2$  (5.0 mL). [The catalyst stock solution was prepared by dissolving 2,2'-bipyridine **8** (8.6 mg, 0.055 mmol) and  $\text{AgNTf}_2$  (19.4 mg, 0.05 mmol) in 5.0 mL  $\text{CH}_2\text{Cl}_2$  and 0.5 mL of this solution was added onto the solution of 6,7-dichlorophthalazine **1c** in 4.5 mL  $\text{CH}_2\text{Cl}_2$ .] At the end of 2 h, the reaction mixture was filtered through a plug of silica gel, washed with additional  $\text{CH}_2\text{Cl}_2$  and concentrated *in vacuo*. Purification by flash column chromatography (hexanes only) gave pure siloxy naphthalene **3o** (190 mg, 85%) as a colorless oil.

$^1\text{H}$  NMR (500 MHz,  $\text{CDCl}_3$ ):  $\delta$  7.85 (s, 1H), 7.80 (s, 1H), 7.64 (s, 1H), 7.53 (d,  $J = 7.7$  Hz, 2H), 7.41 (t,  $J = 7.4$  Hz, 2H), 7.35 (t,  $J = 7.3$  Hz, 1H), 7.12 (s, 1H), 1.19 (sept,  $J = 7.5$  Hz, 3H), 0.97 (d,  $J = 7.5$  Hz, 18H);  $^{13}\text{C}$  NMR (125 MHz,  $\text{CDCl}_3$ ):  $\delta$  152.9, 138.3, 136.3, 132.9, 130.2, 129.8, 128.8, 128.5, 128.0, 127.9, 127.7, 127.3, 127.0, 112.7, 17.8, 12.9; IR (film): 2945, 2867, 1627, 1584, 1479, 1399, 1354, 1121, 973, 885, 813  $\text{cm}^{-1}$ ; HRMS (ESI) Calcd for  $(\text{C}_{25}\text{H}_{30}\text{Cl}_2\text{OSi})\text{H}^+$  ( $\text{M}+\text{H}$ ) $^+$ : 445.1516, Found: 445.1508.

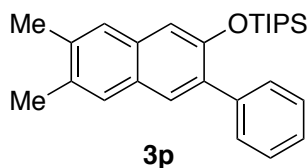

**(6,7-dimethyl-3-phenylnaphthalen-2-yloxy)triisopropylsilane 3p**: Siloxy naphthalene **3p** was prepared according to the Representative Procedure using 6,7-

dimethylphthalazine **1d** (158 mg, 1.0 mmol), AgNTf<sub>2</sub> (0.01 mmol, 1 mol%), 2,2'-bipyridine **8** (0.011 mmol, 1.1 mol%), siloxy alkyne **2m** (357 mg, 1.3 mmol) and CH<sub>2</sub>Cl<sub>2</sub> (2.0 mL). [The catalyst stock solution was prepared by dissolving 2,2'-bipyridine **8** (8.6 mg, 0.055 mmol) and AgNTf<sub>2</sub> (19.4 mg, 0.05 mmol) in 5.0 mL CH<sub>2</sub>Cl<sub>2</sub> and 1.0 mL of this solution was added onto the solution of 6,7-dimethylphthalazine **1d** in 1.0 mL CH<sub>2</sub>Cl<sub>2</sub>.] At the end of 6 h, the reaction mixture was filtered through a plug of silica gel, washed with additional CH<sub>2</sub>Cl<sub>2</sub> and concentrated *in vacuo*. Purification by flash column chromatography (hexanes only) gave pure siloxy naphthalene **3p** (378 mg, 94%) as a colorless oil.

<sup>1</sup>H NMR (500 MHz, CDCl<sub>3</sub>): δ 7.63 (s, 1H), 7.56 (app d, *J* = 7.0 Hz, 2H), 7.52 (s, 1H), 7.46 (s, 1H), 7.39 (app t, *J* = 7.4 Hz, 2H), 7.31 (app t, *J* = 7.3 Hz, 1H), 7.14 (s, 1H), 2.41 (s, 3H), 2.39 (s, 3H), 1.18 (sept, *J* = 7.5 Hz, 3H), 0.97 (d, *J* = 7.5 Hz, 18H); <sup>13</sup>C NMR (125 MHz, CDCl<sub>3</sub>): δ 151.1, 139.4, 135.7, 133.9, 133.3, 132.7, 129.9, 128.8, 128.0, 127.7, 127.1, 126.7, 125.8, 113.0, 20.2, 20.0, 17.9, 12.9; IR (film): 2943, 2866, 1609, 1463, 1411, 1371, 1267, 1201, 990, 900, 830 cm<sup>-1</sup>; HRMS (ESI) Calcd for (C<sub>27</sub>H<sub>36</sub>OSi)Na<sup>+</sup> (M+Na)<sup>+</sup>: 427.2428, Found: 427.2421.

**$^1\text{H}$ - and  $^{13}\text{C}$ -NMR Studies on the Complexation of  $\text{Ag}^+$  to Phthalazine:**

$^1\text{H}$ - and  $^{13}\text{C}$ -NMR experiments were carried out to see the effect of the complexation of  $\text{AgNTf}_2$  to phthalazine in the presence of 2-2'-bipyridine.  $\text{CD}_2\text{Cl}_2$  was used as the solvent in all experiments. First, the  $^1\text{H}$ - and  $^{13}\text{C}$ -NMR spectra of bipyridine and a 1:1 mixture of bipyridine and  $\text{AgNTf}_2$  at 0.1 M concentrations were recorded (Tables 1 and 2, entries 1-2). The chemical shift of  $\text{H}_d$  of bipyridine shifted upfield from 8.43 ppm to 8.21 ppm whereas all the other signals shifted downfield upon complexation with  $\text{AgNTf}_2$ . This upfield shift of  $\text{H}_d$  can be attributed to the different conformations of bipyridine in the absence and presence of  $\text{AgNTf}_2$  as shown below.

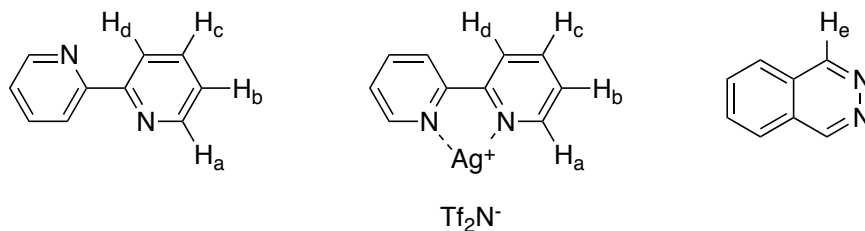

Then, the  $^1\text{H}$ - and  $^{13}\text{C}$ -NMR spectra of phthalazine were recorded in the presence of 0, 20, 50 and 100%  $\text{AgNTf}_2$ -bipyridine (1:1) (Tables 1 and 2, entries 3,4,5 and 6). In all experiments, only one set of signals was observed for each species with no line broadening, which indicated rapid complexation-decomplexation processes. Moreover, the chemical shift of  $\text{H}_e$  of phthalazine shifted gradually downfield from 9.52 to 9.69 ppm with the increasing amounts of  $\text{AgNTf}_2$ -bipyridine added. On the other hand, the chemical shifts of bipyridine in these experiments were very close to those found in entry 2 (Table 1) which suggested that bipyridine stayed complexed to  $\text{AgNTf}_2$  in the presence of phthalazine. A similar trend was observed in  $^{13}\text{C}$ -NMR spectra in which the chemical shift of  $\text{C}_1$  of phthalazine shifted downfield from 151.6 to 155.0 ppm with the increasing amounts of  $\text{AgNTf}_2$ -bipyridine added (Table 2, entries 3,4,5 and 6). As a control experiment, the  $^1\text{H}$ - and  $^{13}\text{C}$ -NMR spectra of a 1:1 mixture of phthalazine and bipyridine (0.1 M) were recorded and the values were found to be essentially the same as those when the NMRs of both compounds were recorded separately (Tables 1 and 2, entry 8). It should also be noted that, in all experiments, the  $^1\text{H}$ -NMR spectra were recorded after 10

and 45 minutes in order to see if an equilibration process would cause any change and the same spectra were obtained in each case.

Finally,  $^1\text{H}$ - and  $^{13}\text{C}$ -NMR spectra of a mixture of phthalazine and  $\text{AgNTf}_2$  (1:0.2)<sup>17</sup> were recorded (Tables 1 and 2, entry 7). The chemical shifts of  $\text{H}_e$  and  $\text{C}_1$  of phthalazine were found to be affected more in the absence of bipyridine (9.65 and 153.1 ppm, respectively).

**Table 1.**  $^1\text{H}$ -NMR Studies

|                |                                                         | $^1\text{H}$ -NMR (ppm) <sup>a</sup> |                 |              |              |              |
|----------------|---------------------------------------------------------|--------------------------------------|-----------------|--------------|--------------|--------------|
|                |                                                         | Phthalazine                          | 2-2'-Bipyridine |              |              |              |
|                |                                                         | $\text{H}_e$                         | $\text{H}_a$    | $\text{H}_d$ | $\text{H}_c$ | $\text{H}_b$ |
| 1              | 0.1 M bipyridine                                        | -                                    | 8.66            | 8.43         | 7.83         | 7.32         |
| 2              | 0.1 M bipyridine+ $\text{AgNTf}_2$ (1:1)                | -                                    | 8.70            | 8.21         | 8.07         | 7.60         |
| 3              | 0.1 M phthalazine                                       | 9.52                                 | -               | -            | -            | -            |
| 4 <sup>b</sup> | Phthalazine + bipyridine + $\text{AgNTf}_2$ (1:0.2:0.2) | 9.57                                 | 8.73            | 8.27         | 8.06         | 7.57         |
| 5 <sup>b</sup> | Phthalazine + bipyridine + $\text{AgNTf}_2$ (1:0.5:0.5) | 9.64                                 | 8.71            | 8.26         | -            | 7.58         |
| 6 <sup>b</sup> | Phthalazine + bipyridine + $\text{AgNTf}_2$ (1:1:1)     | 9.69                                 | 8.69            | 8.24         | -            | 7.58         |
| 7 <sup>b</sup> | Phthalazine + $\text{AgNTf}_2$ (1:0.2)                  | 9.65                                 | -               | -            | -            | -            |
| 8              | 0.1 M phthalazine + bipyridine (1:1)                    | 9.51                                 | 8.65            | 8.43         | 7.82         | 7.31         |

<sup>a</sup> Solvent ( $\text{CD}_2\text{Cl}_2$ ) signal was calibrated to 5.32 ppm. <sup>b</sup>[phthalazine] = 0.1 M.

<sup>17</sup> An attempt to prepare a 0.1 M, 1:1 mixture of phthalazine and  $\text{AgNTf}_2$  failed due to the insolubility of the mixture.

**Table 2.**  $^{13}\text{C}$ -NMR Studies

|                |                                                                 | $^{13}\text{C}$ -NMR (ppm) <sup>a</sup> |       |                 |       |       |       |       |
|----------------|-----------------------------------------------------------------|-----------------------------------------|-------|-----------------|-------|-------|-------|-------|
|                |                                                                 | Phthalazine                             |       | 2-2'-Bipyridine |       |       |       |       |
| 1              | 0.1 M bipyridine                                                | -                                       | -     | 156.6           | 149.7 | 137.4 | 124.3 | 121.4 |
| 2              | 0.1 M<br>bipyridine+AgNTf <sub>2</sub><br>(1:1)                 | -                                       | -     | 151.7           | 151.7 | 140.1 | 126.6 | 122.9 |
| 3              | 0.1 M phthalazine                                               | 151.6                                   | 133.1 | -               | -     | -     | -     | -     |
| 4 <sup>b</sup> | Phthalazine +<br>bipyridine +<br>AgNTf <sub>2</sub> (1:0.2:0.2) | 152.3                                   | 133.7 | 152.8           | 151.5 | 139.6 | 126.1 | 123.0 |
| 5 <sup>b</sup> | Phthalazine +<br>bipyridine +<br>AgNTf <sub>2</sub> (1:0.5:0.5) | 153.3                                   | 134.4 | 152.5           | 151.6 | 139.8 | 126.3 | 123.2 |
| 6 <sup>b</sup> | Phthalazine +<br>bipyridine +<br>AgNTf <sub>2</sub> (1:1:1)     | 155.0                                   | 135.5 | 152.3           | 151.6 | 139.9 | 126.4 | 123.2 |
| 7 <sup>b</sup> | Phthalazine +<br>AgNTf <sub>2</sub> (1:0.2)                     | 153.1                                   | 134.1 | -               | -     | -     | -     | -     |
| 8              | 0.1 M phthalazine<br>+ bipyridine (1:1)                         | 151.6                                   | 133.1 | 156.6           | 149.7 | 137.4 | 124.3 | 121.3 |

<sup>a</sup> Solvent (CD<sub>2</sub>Cl<sub>2</sub>) signal was calibrated to 54.0 ppm. <sup>b</sup>[phthalazine] = 0.1 M.

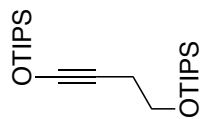

**2i**  
<sup>1</sup>H-NMR in C<sub>6</sub>D<sub>6</sub>

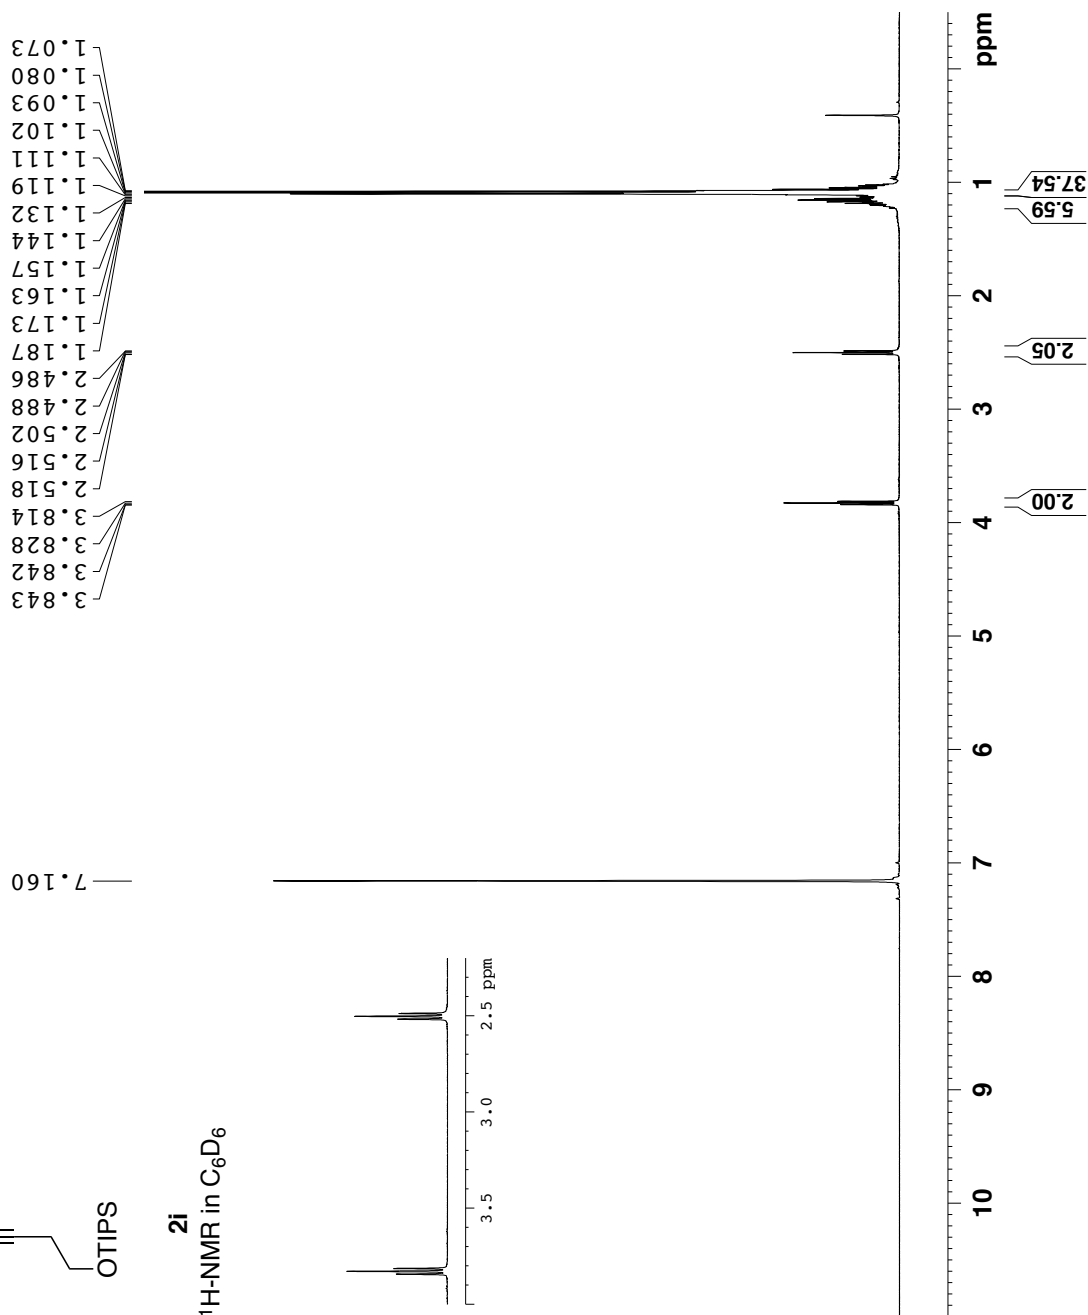

```

NAME      yet.7_OTIPSaa2
EXPNO    1
PROCNO   1
Time     20111025
Time     12.25
INSTRUM  spect
PROBHD   5 mm QNP 1H
PULPROG  zg
TD        48076
SOLVENT  C6D6
NS        4
DS        0
SWH      8012.820 Hz
FIDRES   0.16974 Hz
AQ        2.999924 sec
RG        64
DW        62.400 usec
DE        4.50 usec
TE        300.0 K
D1        10.00000000 sec

===== CHANNEL f1 =====
NUC1      1H
P1        9.00 usec
PL1       0.00 dB
SFO1      500.1325006 MHz
SI        65536
SF        500.1300573 MHz
WDW       EM
SSB       0
LB        0.30 Hz
GB        0
PC        1.00
    
```



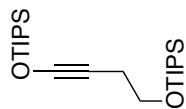

**2i**  
<sup>13</sup>C-NMR in C<sub>6</sub>D<sub>6</sub>

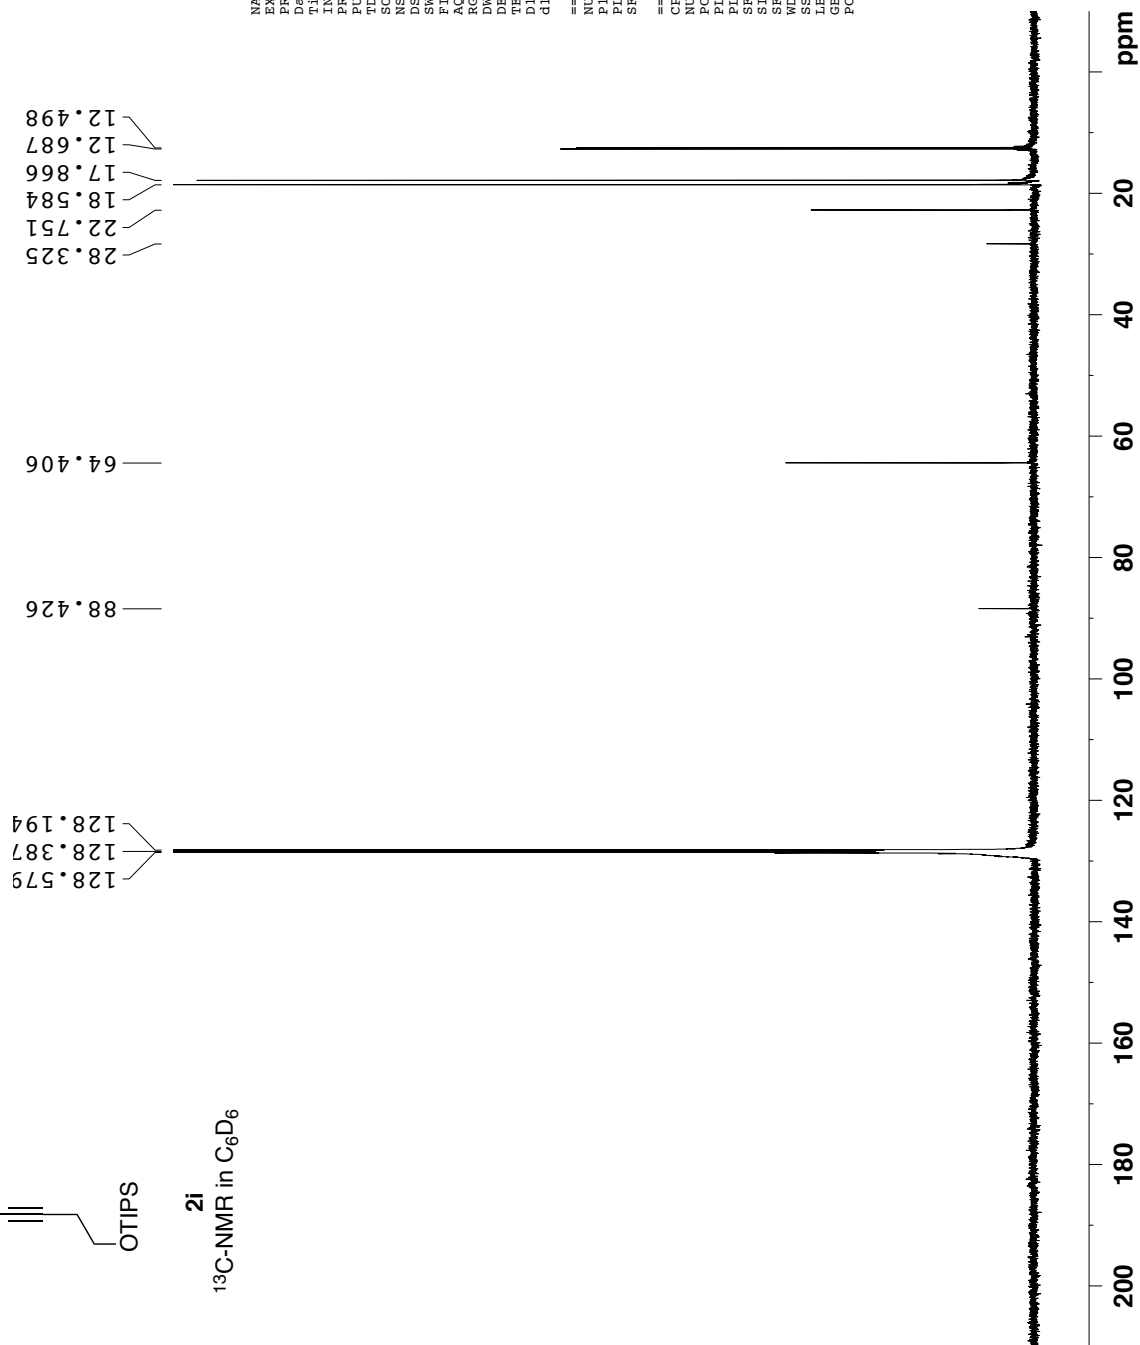

```

NAME      jret.7.OTIPSeas2
EXPNO    2
PROCNO   1
Date_    20111025
Time     14.17
INSTRUM  spect
PROBHD   5 mm QNP 1H
PULPROG  zgpg
TD        65536
SOLVENT  CDCl3
NS        2568
DS        0
SWH       37593.984 Hz
FIDRES    0.500026 Hz
AQ         0.9999972 sec
RG         4096
DE         13.300 usec
TE         7.50 usec
D1         300.0 K
D11        0.10000000 sec
d111       0.05000000 sec

===== CHANNEL f1 =====
NUC1       13C
P1         4.60 usec
PL1        0.00 dB
SFO1       125.7690572 MHz

===== CHANNEL f2 =====
CPDPRG2   waltz16
NUC2       1H
PCPD2     90.00 usec
RGPD2     120.00 dB
PL12      19.00 dB
SFO2       500.1320005 MHz
SI         32768
SF         125.7571160 MHz
WDW        EM
SSB        0
LB         1.00 Hz
GB         0
PC         1.40
    
```

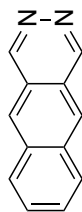

**1b**  
<sup>1</sup>H-NMR in CDCl<sub>3</sub>

9.616  
 8.535  
 8.174  
 8.168  
 8.161  
 8.155  
 7.722  
 7.715  
 7.709  
 7.702  
 7.260

```

NAME yet.6.phtha
EXPNO 1
PROCNO 1
Date_ 20110805
Time_ 10.20
INSTRUM spect
PROBHD 5 mm QNP 1H
PULPROG zgpg30
TD 48076
SOLVENT CDCl3
NS 4
DS 0
SWH 8012.820 Hz
FIDRES 0.146670 Hz
AQ 2.999924 sec
RG 128
WDW EM
DE 62.400 usec
TE 300.0 K
D1 10.00000000 sec

===== CHANNEL f1 =====
NUC1 1H
P1 9.00 usec
PL1 0.00 dB
SFO1 500.1325008 MHz
SI 65536
SF 500.1300136 MHz
WDW EM
SSB 0
LB 0.30 Hz
GB 0
PC 1.00
    
```

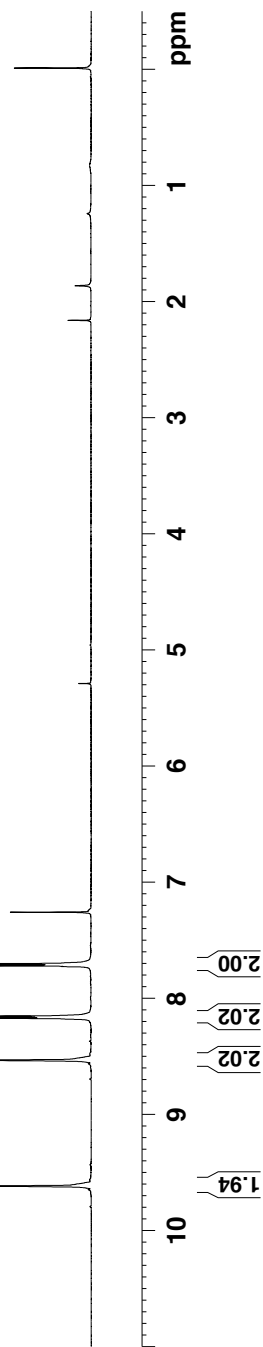

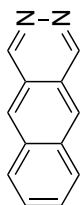

**1b**  
<sup>13</sup>C-NMR in CDCl<sub>3</sub>

77.254  
 76.999  
 76.745

151.724

135.113  
 128.973  
 128.381  
 126.479  
 123.009

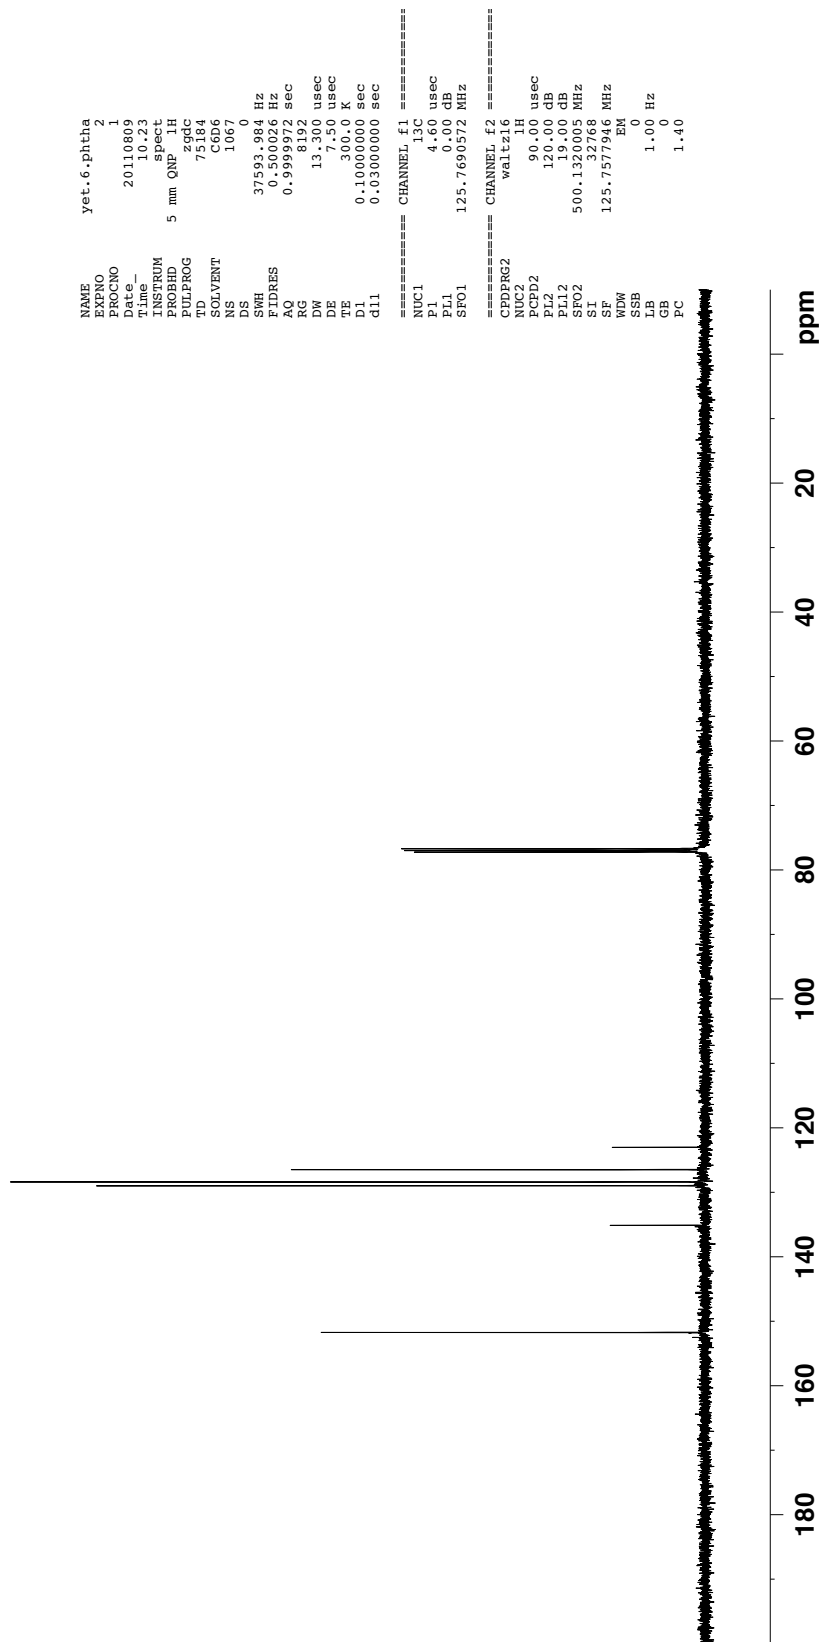

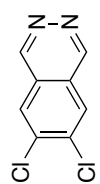

**1c**  
<sup>1</sup>H-NMR in CDCl<sub>3</sub>

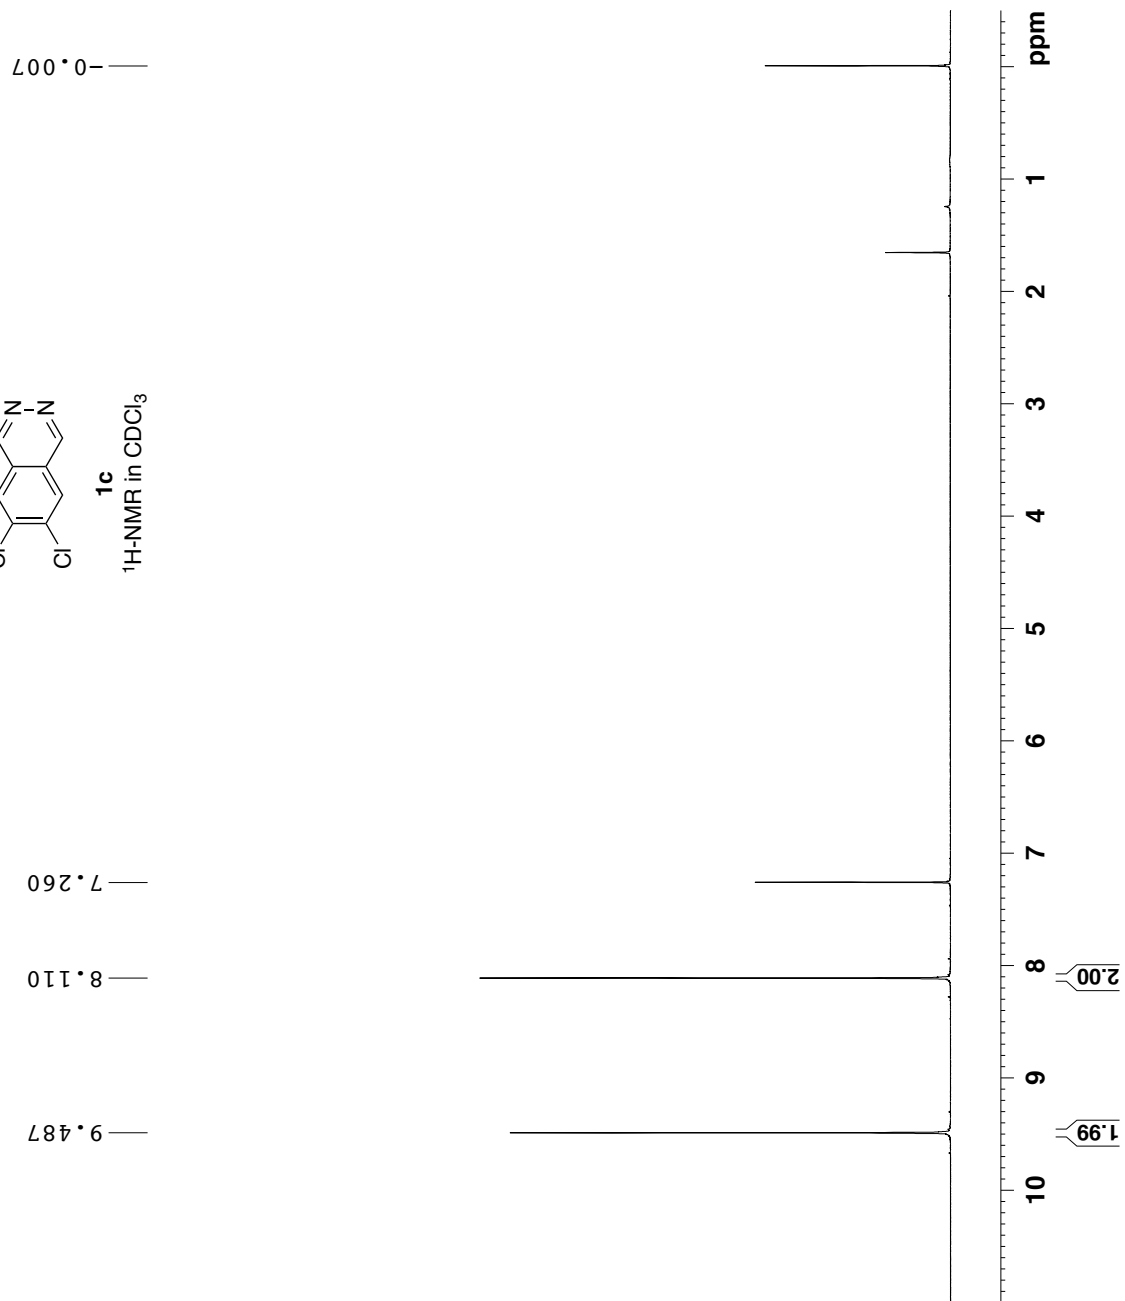

```

NAME                               Yet..6..247b
EXPNO                               1
PROCNO                              1
Date_                               20110921
Time                                10.04
INSTRUM                             spect
PROBHD                               5 mm QNP 1H
PULPROG                             zgpg30
TD                                   48079
SOLVENT                             CDCl3
NS                                   4
DS                                   0
SWH                                  8012.820 Hz
FIDRES                              0.166670 Hz
AQ                                   2.9999924 sec
RG                                   256
DW                                   62.400 usec
DE                                   4.300 usec
TE                                   300.2
D1                                   10.0000000 sec

===== CHANNEL f1 =====
NUC1                                 1H
P1                                   9.00 usec
PL1                                  0.00 dB
SFO1                               500.1325006 MHz
SI                                   65536
SF                                     500.1300135 MHz
SW                                     20
SSW                                    0
LB                                   0.30 Hz
GB                                   0
PC                                   1.00
  
```

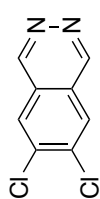

**1c**  
<sup>13</sup>C-NMR in CDCl<sub>3</sub>

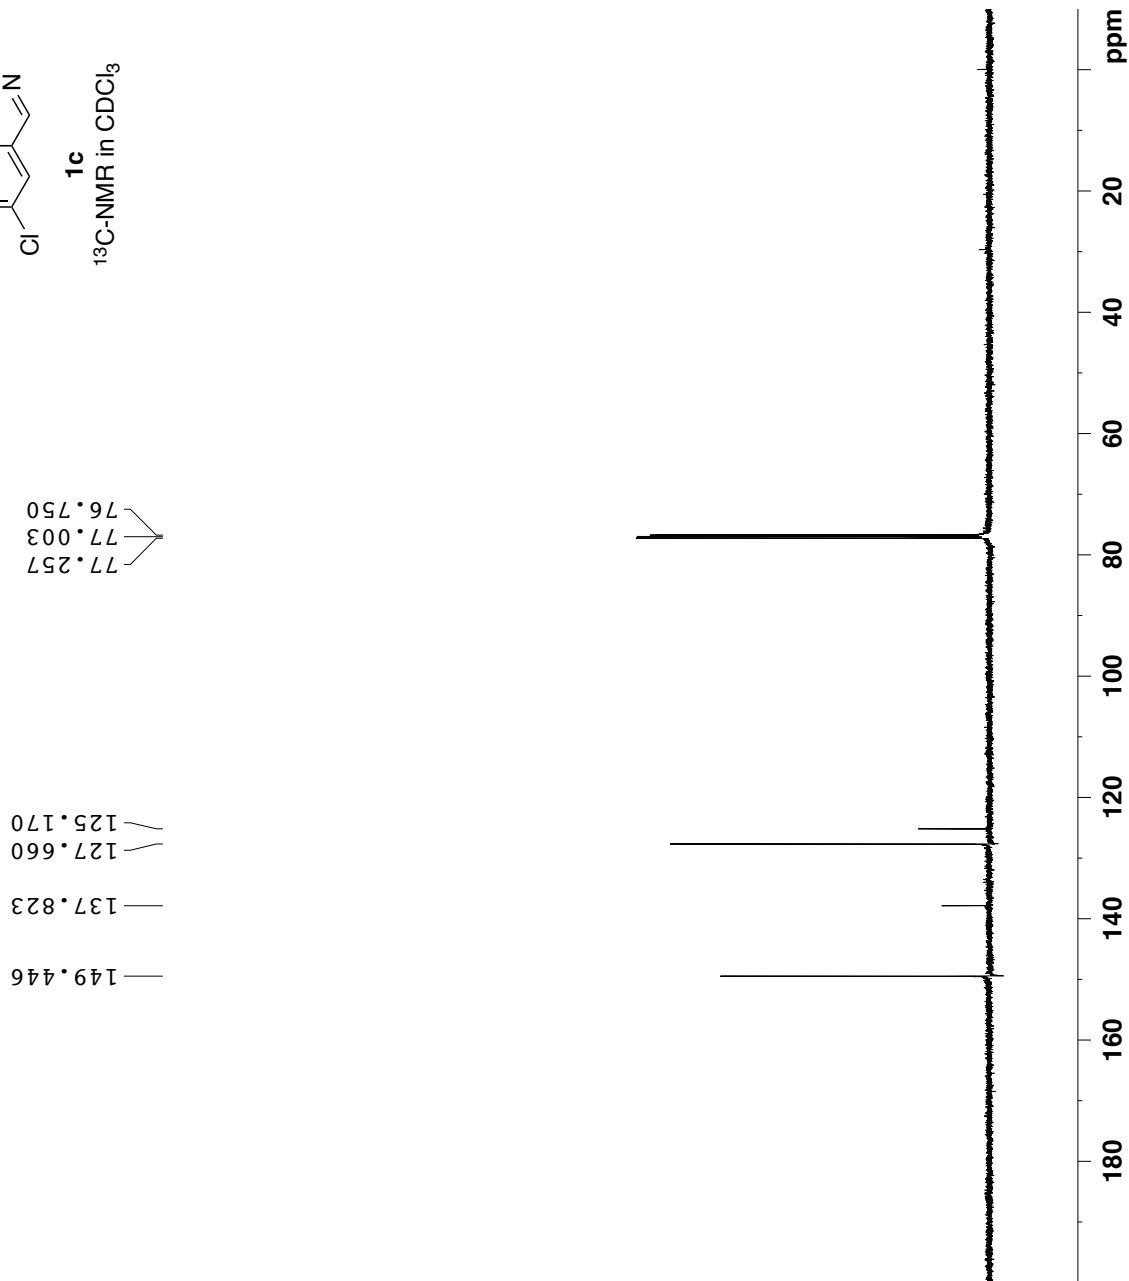

```

NAME                               yet..6..247b
EXPNO                               2
PROCNO                               1
Date_                                20110921
Time                               21:01
INSTRUM                             spect
PROBHD                               5 mm QNP 1H
PULPROG                             zgdc
TD                                   75184
SOLVENT                             CDCl3
NS                                   3861
DS                                   0
SWH                                   37593.984 Hz
FIDRES                               0.500026 Hz
AQ                                   0.999972 sec
RG                                   819
DM                                   13.300 usec
DE                                   7.50 usec
TE                                   300.0 K
D1                                   0.10000000 sec
d11                                  0.03000000 sec

===== CHANNEL f1 =====
NUC1                                  13C
P1                                   4.60 usec
SFO1                                 125.7690572 MHz

===== CHANNEL f2 =====
CPDPRG2                             waltz16
NUC2                                  1H
PCPD2                                90.00 usec
PL2                                  120.00 dB
PL12                                 19.00 dB
SFO2                                 500.1320005 MHz
SI                                   32768
WDW                                   EM
SSB                                   0
LB                                   1.00 Hz
GB                                   0
PC                                   1.40
    
```

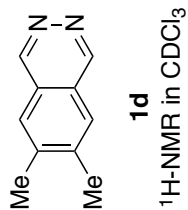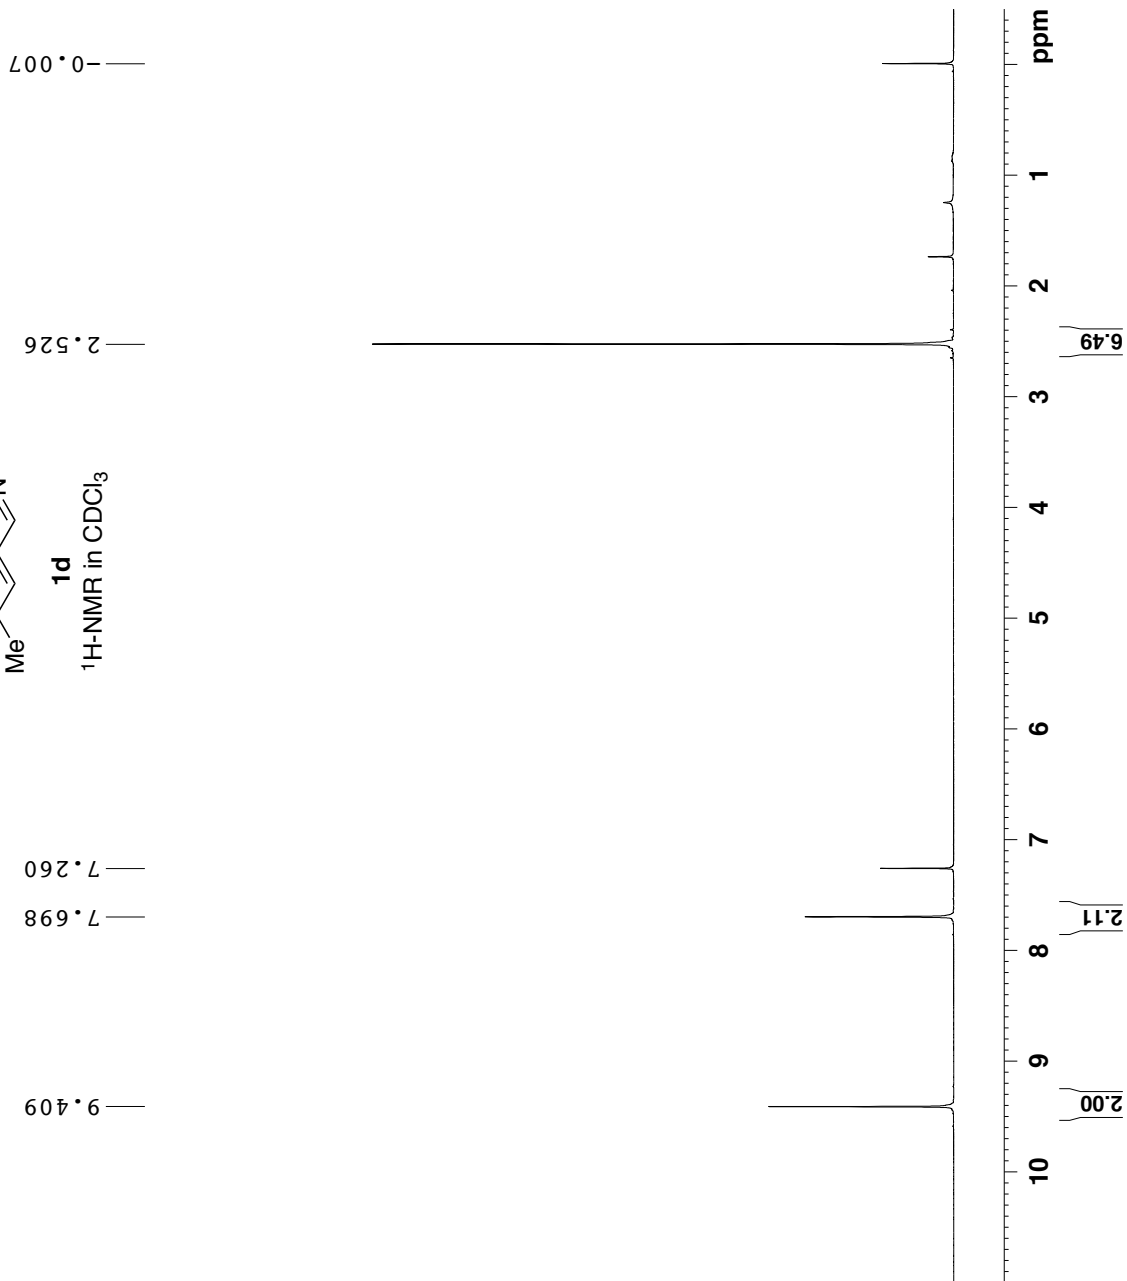

```

NAME          yet-.6.193b
EXPNO         1
PROCNO        1
Date_         20110824
Time          18.13
INSTRUM       spect
PROBHD        5 mm QNP 1H
PULPROG       zg
TD            48076
SOLVENT       CDCl3
NS            8
DS            0
SWH           8012.820 Hz
FIDRES        0.166670 Hz
AQ            2.9999824 sec
RG            327
DE            62.400 usec
TE            300.0 K
D1            10.00000000 sec

===== CHANNEL f1 =====
NUC1          1H
P1            9.00 usec
PL1           0.00 dB
SFO1          500.132606 MHz
SF            500.1300134 MHz
WDW           EM
SSB           0
LB            0.30 Hz
GB            0
PC            1.00
  
```

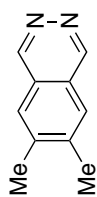

**1d**  
 $^{13}\text{C}$ -NMR in  $\text{CDCl}_3$

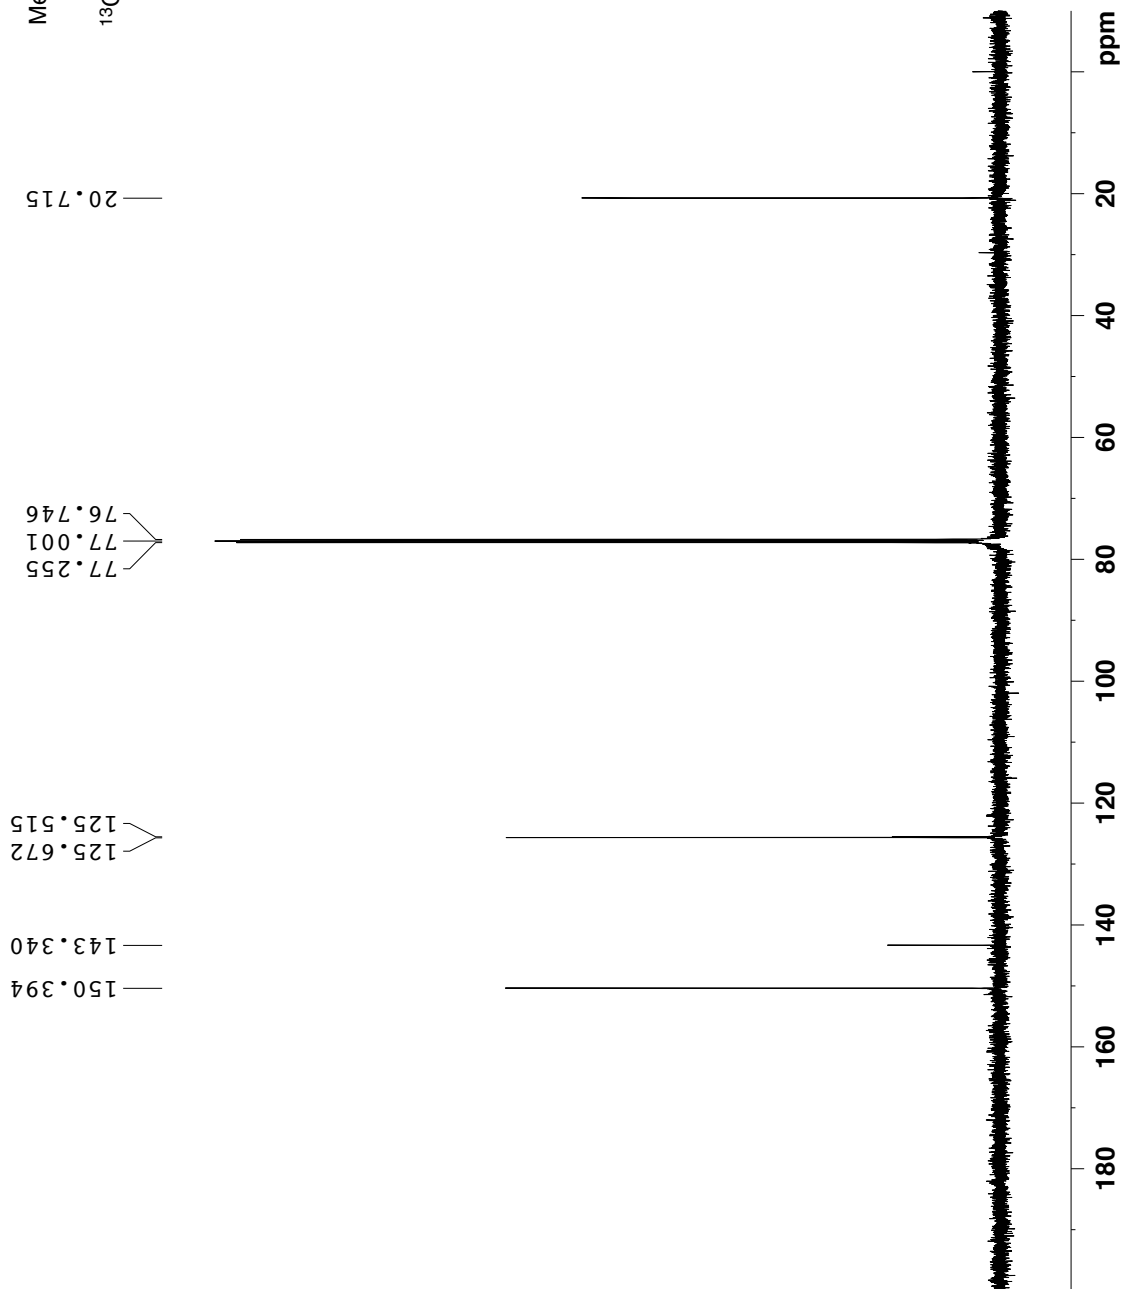

```

NAME          yet.6.193b
EXPNO         2
PROCNO        1
Date_         20110824
Time         19.12
INSTRUM       spect
PROBHD        5 mm QNP-1H
PULPROG       zgpg30
TD            65536
SOLVENT       CDCl3
NS            2757
DS            0
SWH           37593.984 Hz
FIDRES        0.500026 Hz
AQ            0.9999972 sec
RG            13.192
DW            13.300 usec
DE            0.0000000 sec
TE            300.2 K
D1            0.10000000 sec
d11           0.03000000 sec

===== CHANNEL f1 =====
NUC1          13C
P1            4.60 usec
PL1           0.00 dB
SFO1         125.7690572 MHz

===== CHANNEL f2 =====
CPDPRG2       waltz16
NUC2          1H
PCPD2         90.00 usec
PL2          120.00 dB
PL12         19.00 dB
SFO2         500.1320005 MHz
SI            32768
SF           125.7577923 MHz
WDW           EM
SSB           0
LB           1.00 Hz
GB            0
PC           1.40
  
```

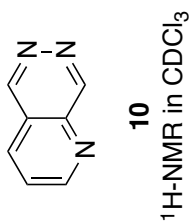

9.781  
 9.582  
 9.579  
 9.269  
 9.266  
 9.260  
 9.257  
 8.320  
 8.319  
 8.318  
 8.304  
 8.302  
 8.301  
 7.851  
 7.843  
 7.835  
 7.826  
 7.826  
 7.260

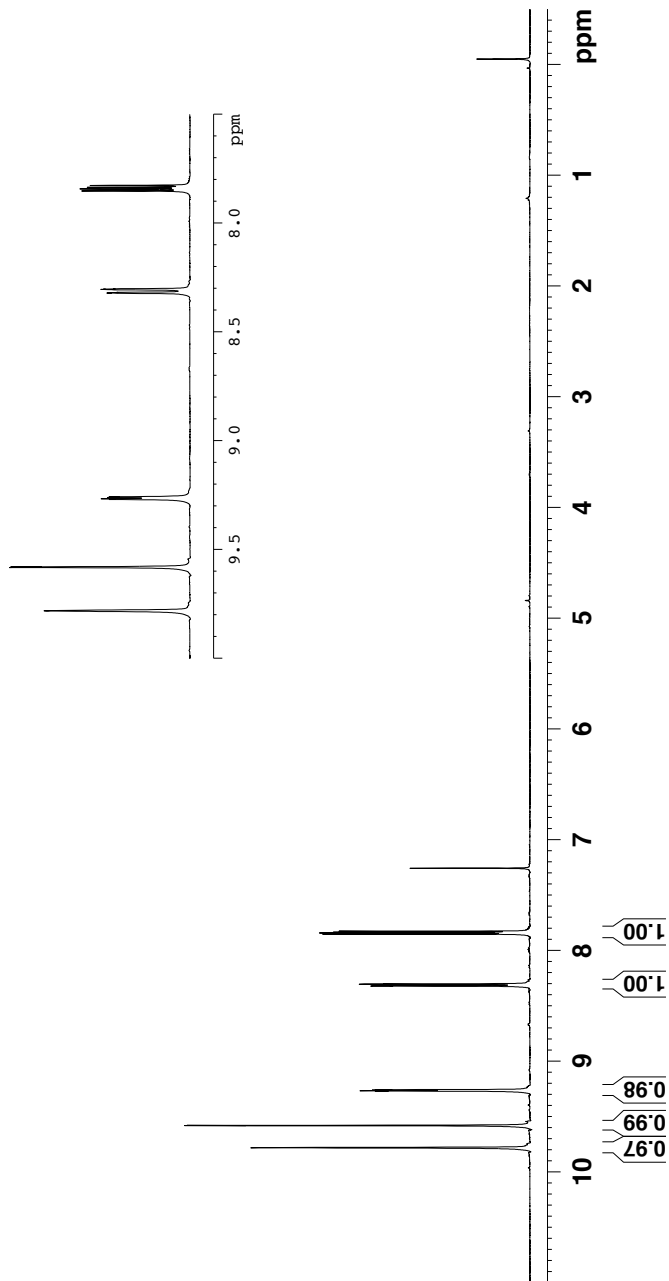

```

NAME yet.7.100b1
EXPNO 1
PROCNO 1
Date_ 20120128
Time 5.50
INSTRUM spect
PROBHD 5 mm QNP 1H/13
PULPROG zg
TD 59998
SOLVENT CDCl3
NS 4
DS 0
SWH 10000.000 Hz
FIDRES 0.166672 Hz
AQ 2.9999499 se
RG 181
DW 50.000 us
DE 7.50 us
TE 295.2 K
D1 15.00000000 se
TD0 1

===== CHANNEL f1 =====
NUC1 1H
P1 10.00 us
PL1 0.00 dB
SFO1 499.8740056 MH
SI 32768
SF 499.8700169 MH
WDW no
SSB 0
LB 0.00 Hz
GB 0
PC 1.00
  
```



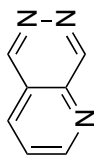

**10**  
<sup>13</sup>C-NMR in CDCl<sub>3</sub>

156.63  
 153.00  
 150.70  
 141.88  
 134.14  
 127.36  
 122.17  
 77.26  
 77.01  
 76.75

```

NAME yet.7.100b1
EXPNO 2
PROCNO 1
Date_ 20120128
Time 6.06
INSTRUM spect
PROBHD 5 mm QNP 1H/13
PULPROG zgpgc
TD 142854
SOLVENT CDCl3
NS 284
DS 0
SWH 30303.031 Hz
FIDRES 0.212126 Hz
AQ 2.3571410 sec
RG 16384
DW 16.500 usec
DE 7.50 usec
TE 296.1 K
D1 2.00000000 sec
d11 0.03000000 sec
TD0 1

===== CHANNEL f1 =====
NUC1 13C
P1 8.50 usec
PL1 0.00 dB
SF01 125.7049802 MHz

===== CHANNEL f2 =====
CPDPRG2 waltz16
NUC2 1H
PCPD2 90.00 usec
PL2 1.00 dB
PL12 21.00 dB
SF02 499.8734991 MHz
SI 32768
SF 125.6924226 MHz
WDW no
SSB 0
LB 0.00 Hz
GB 0
PC 1.40
    
```

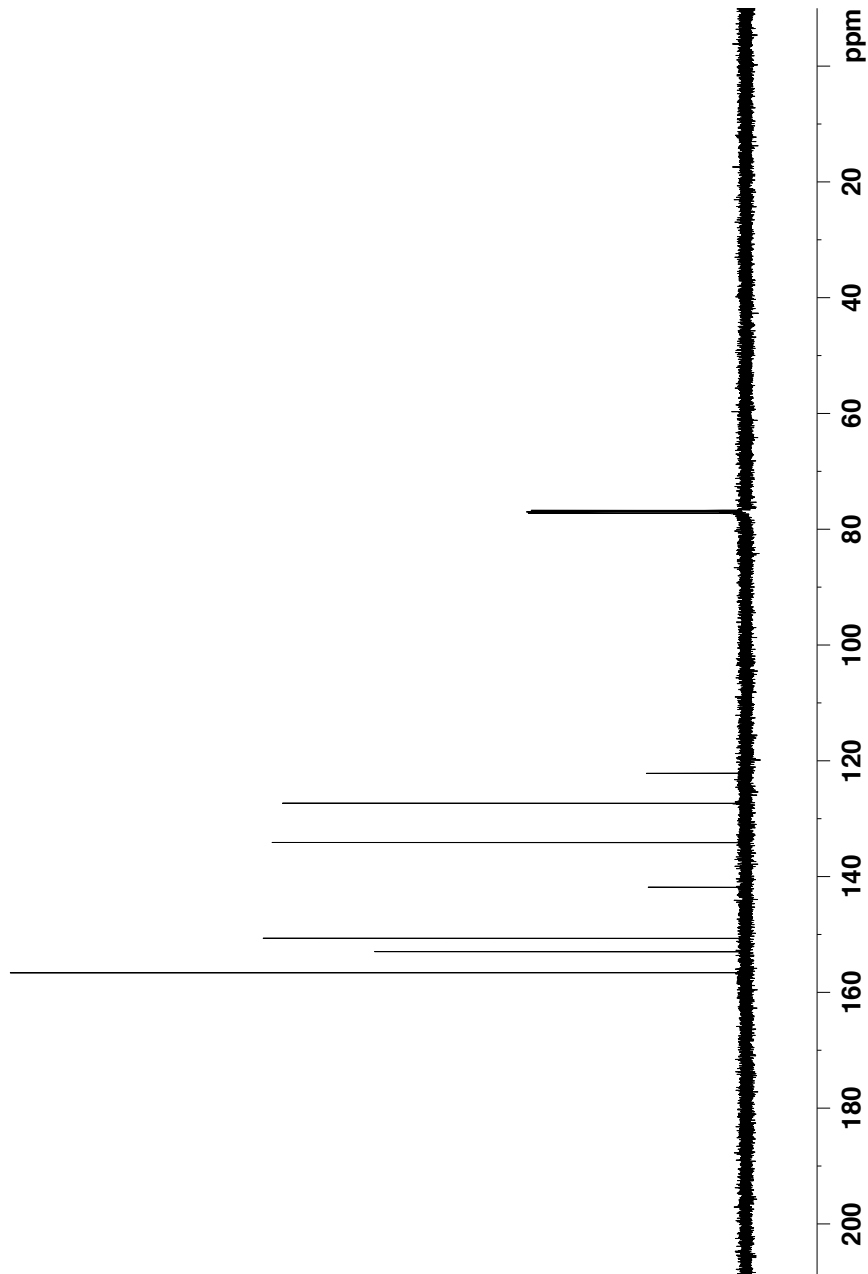

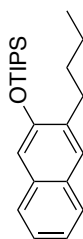

**3a**  
<sup>1</sup>H-NMR in CDCl<sub>3</sub>

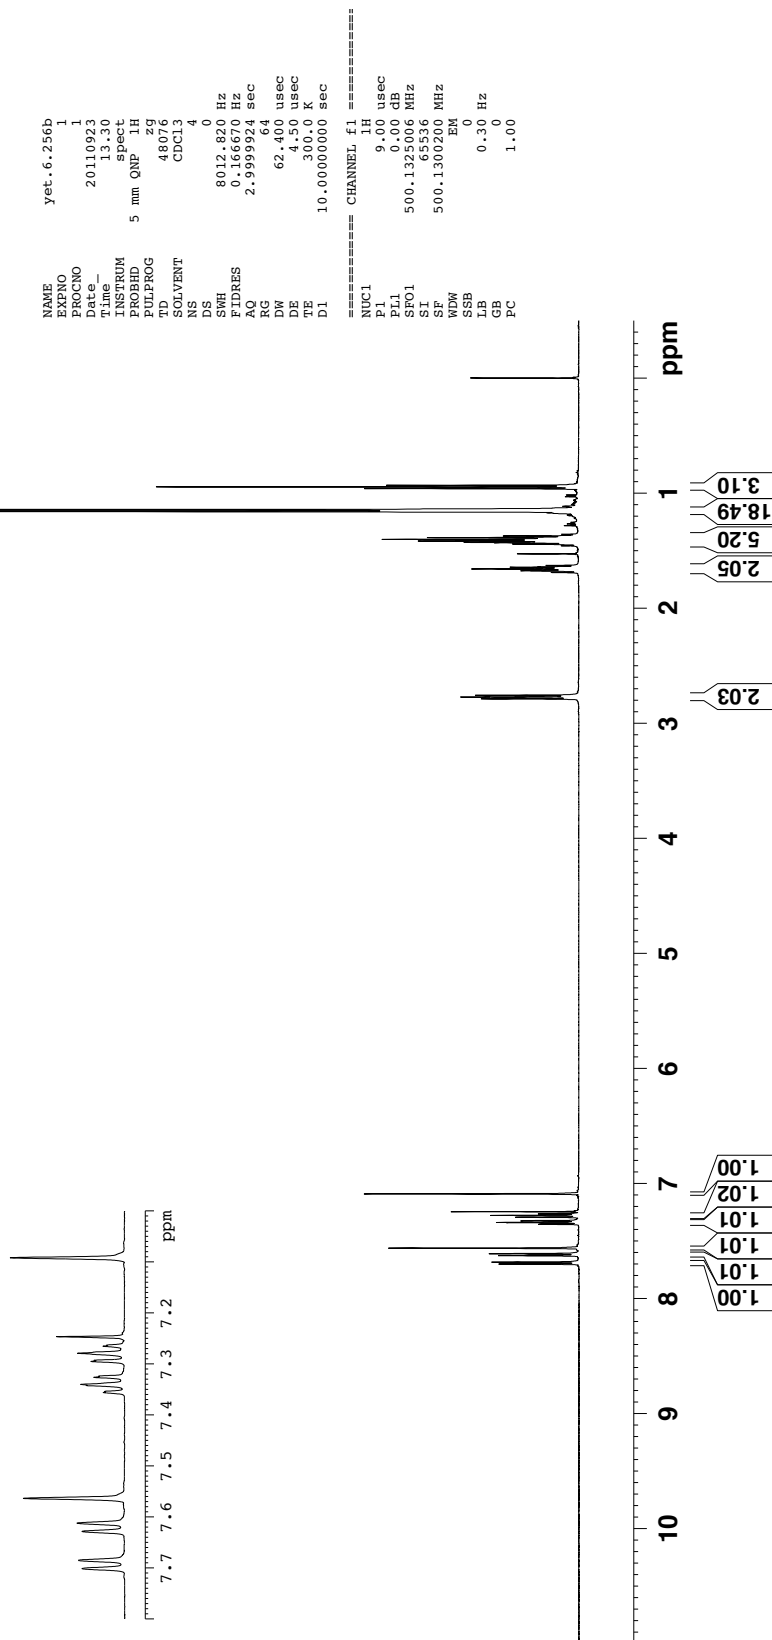

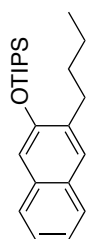

**3a**  
<sup>13</sup>C-NMR in CDCl<sub>3</sub>

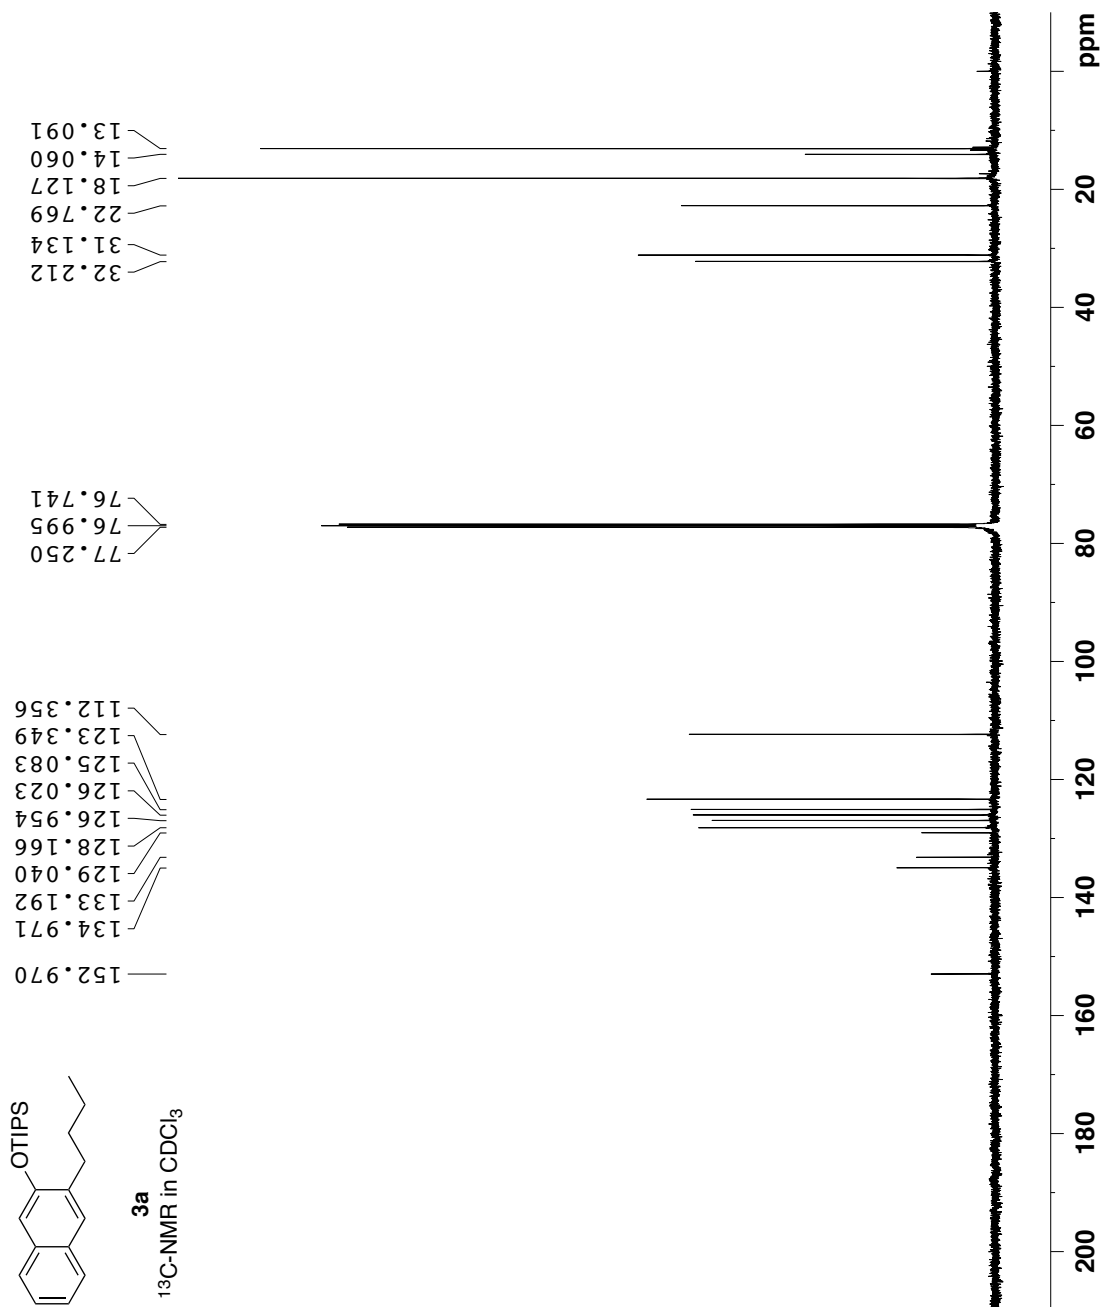

```

NAME                               yet.6.242c
EXPNO                               2
PROCNO                              1
Date_                                20110913
Time                               0.54
INSTRUM                             spect
PROBHD                               5 mm QNP 1H
PULPROG                             zgdc
TD                                   75184
SOLVENT                             CDCl3
NS                                   4650
DS                                   0
SWH                                   37593.984 Hz
FIDRES                              0.500026 Hz
AQ                                   0.93998192 sec
RG                                   8192
WDW                                   13.300 usec
DE                                   7.50 usec
TE                                   300.0 K
D1                                   0.10000000 sec
d11                                  0.03000000 sec

===== CHANNEL f1 =====
NUC1                                  13C
P1                                   4.60 usec
PL1                                  0.00 dB
SFO1                                  125.7690572 MHz

===== CHANNEL f2 =====
CPDPRG2                             waltz16
NUC2                                  1H
PCPD2                                90.00 usec
PL2                                  120.00 dB
PL12                                 19.00 dB
SFO2                                  500.1320005 MHz
SI                                   32768
SF                                     125.7577998 MHz
WDW                                   EM
SSB                                   0
LB                                   1.00 Hz
GB                                   0
PC                                   1.40
    
```

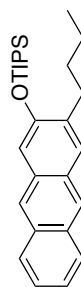

**3b**  
<sup>1</sup>H-NMR in CDCl<sub>3</sub>

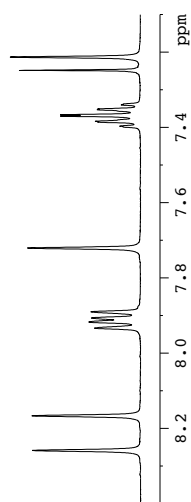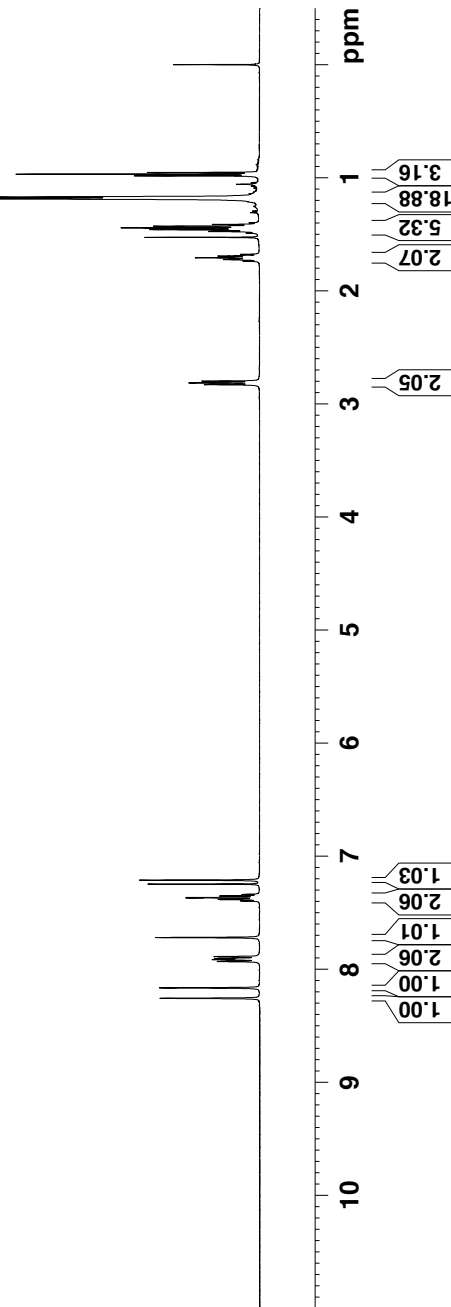

```

NAME                               Yet.6..260b
EXPNO                               1
PROCNO                              1
Date_                               20110923
Time_                               22.11
INSTRUM                             spect
PROBHD                              5 mm QNP 1H
PULPROG                             zgpg30
TD                                   48029
SOLVENT                             CDCl3
NS                                   4
DS                                   0
SWH                                  8012.820 Hz
FIDRES                              0.166670 Hz
AQ                                   2.9999924 sec
RG                                   64
DW                                   62.400 usec
DE                                   4.50 usec
TE                                   300.2 K
D1                                   10.0000000 sec

===== CHANNEL f1 =====
NUC1                                 1H
P1                                   9.00 usec
PL1                                  0.00 dB
SF01                               500.1325006 MHz
SI                                   65536
SF02                               500.1300195 MHz
SFO3                               0
SWH                                 0.30 Hz
SSB                                  0
LB                                   0
GB                                   0
PC                                   1.00
    
```

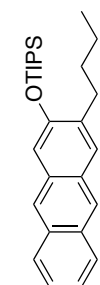

**3b**

<sup>13</sup>C-NMR in CDCl<sub>3</sub>

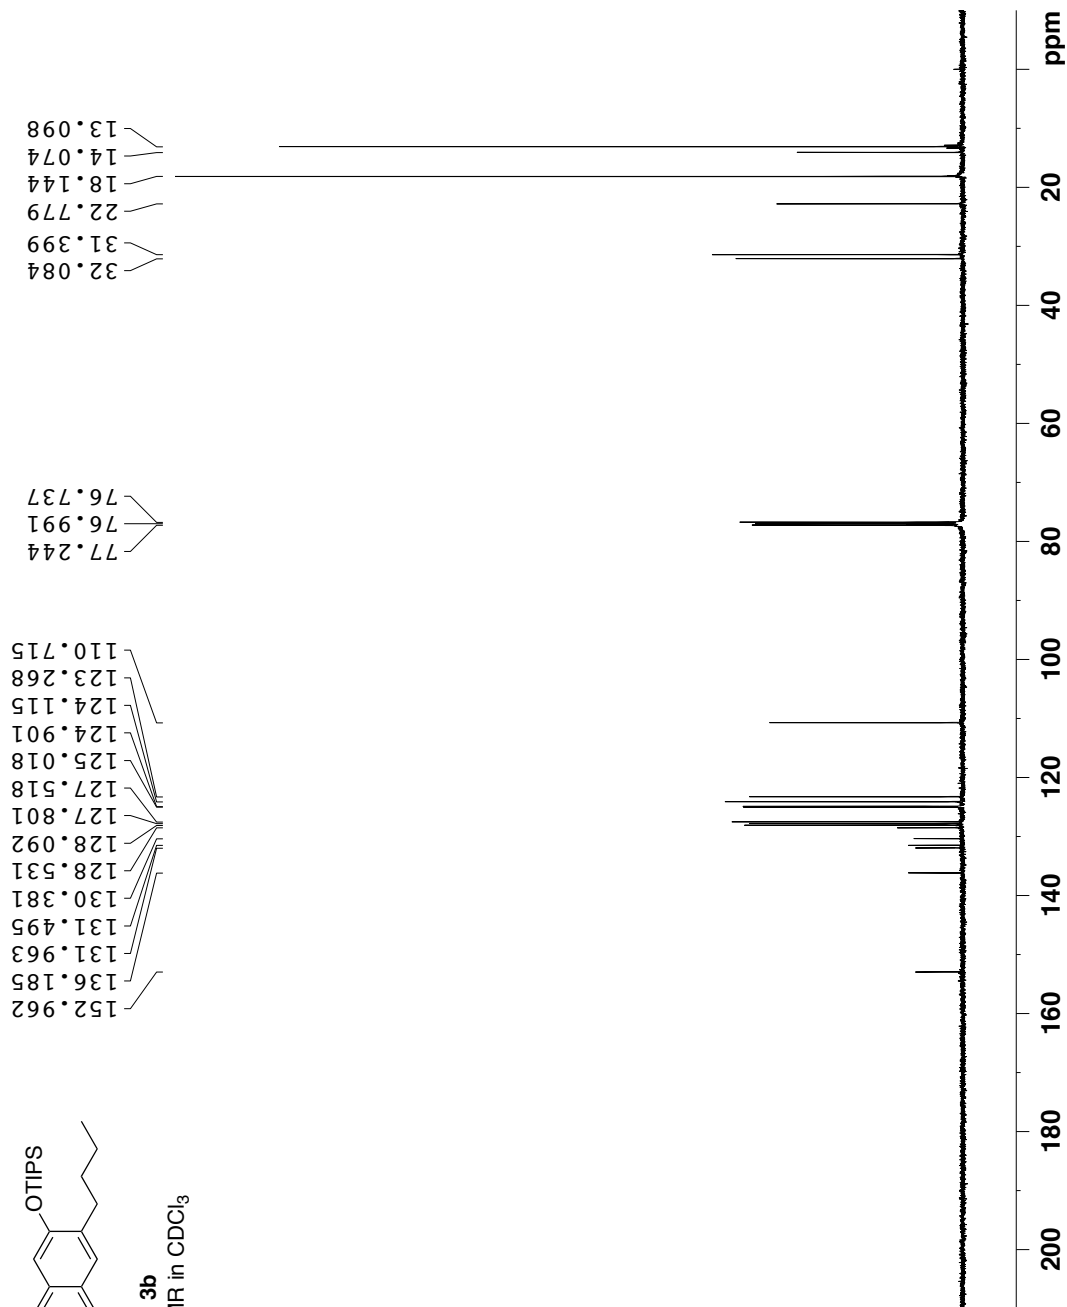

```

NAME                               yet_6_260p
EXPNO                               2
PROCNO                               1
Date_                               20110923
Time_                               22.27
INSTRUM                             spect
PROBHD                               5 mm QNP 1H
PULPROG                             zgdc
TD                                   75184
SOLVENT                             CDCl3
NS                                   2996
DS                                   0
SWH                                  37593.984 Hz
FIDRES                              0.500026 Hz
AQ                                   0.9999972 sec
RG                                   8192
DW                                   13.300 usec
DE                                   7.50 usec
TE                                   300.0 K
D1                                   0.1000000 sec
d11                                  0.0300000 sec

===== CHANNEL f1 =====
NUC1                                  13C
P1                                   4.60 usec
PL1                                  0.00 dB
SFO1                                 125.7690572 MHz

===== CHANNEL f2 =====
CPDPRG2                             waltz16
NUC2                                  1H
PCPD2                                90.00 usec
PL2                                   120.00 dB
PL12                                 19.00 dB
SFO2                                 500.1320005 MHz
SI                                    32768
SF                                   125.7577929 MHz
WDW                                  EM
SSB                                  0
LB                                   1.00 Hz
GB                                   0
PC                                   1.40
    
```

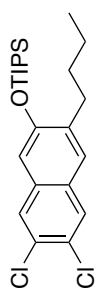

**3c**  
<sup>1</sup>H-NMR in CDCl<sub>3</sub>

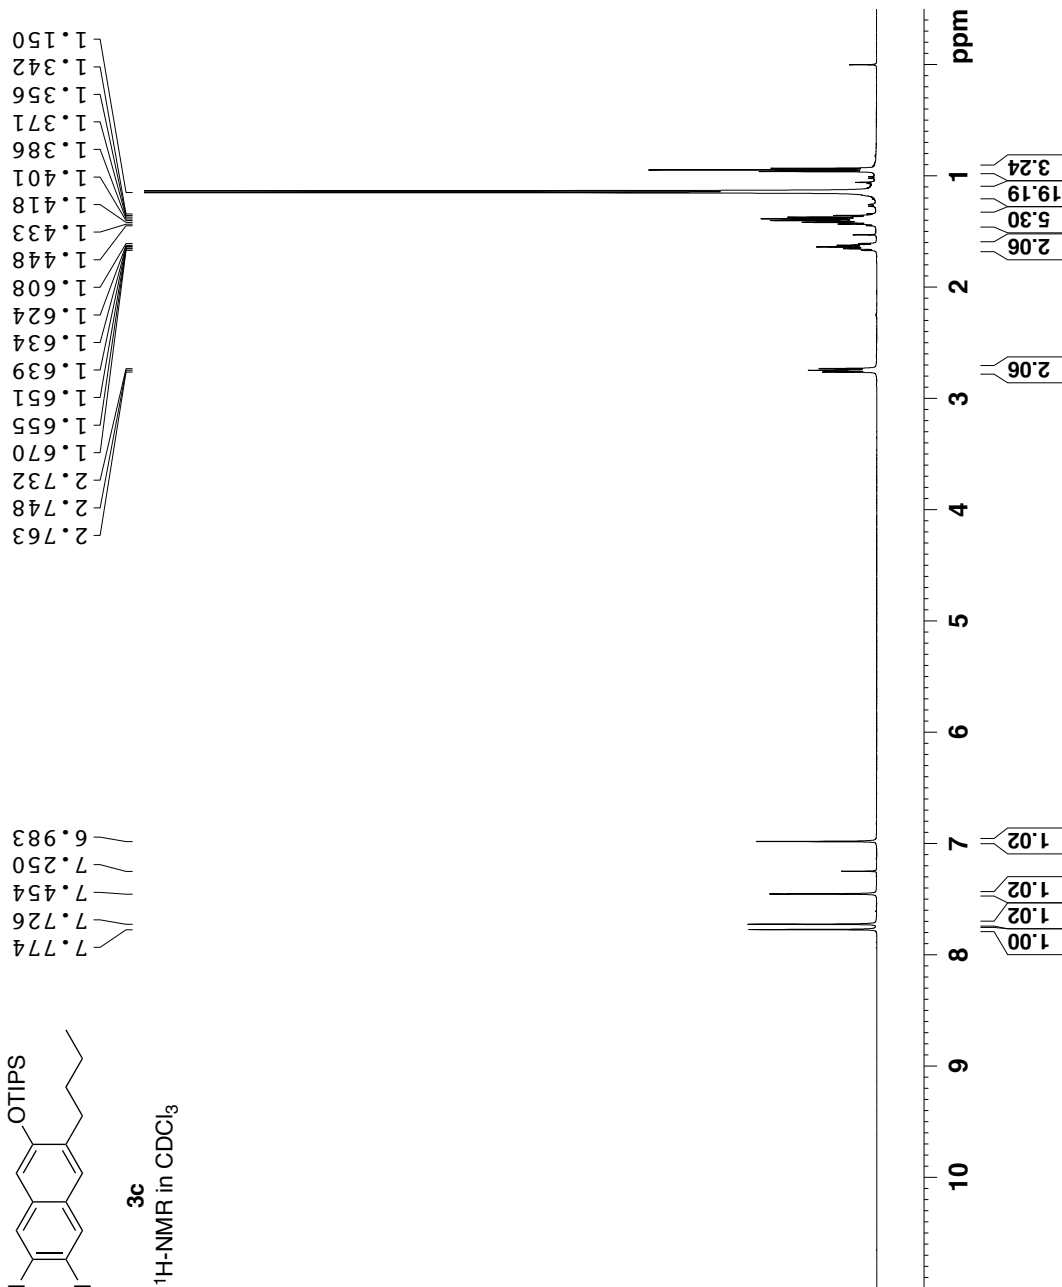

```

NAME          yet-6.262b
EXPNO         1
PROCNO        1
F2 - time     20110925
Time         0.05
INSTRUM       spect
PROBHD        5 mm QNP 1H
PULPROG       zg
TD            48076
SOLVENT       CDCl3
NS            4
DS            0
AQ           8012.820 Hz
FIDRES       0.16687 Hz
AQRES        2.9999974 sec
RG           32
DW           62.400 usec
DE           4.50 usec
TE           300.0 K
D1           10.00000000 sec

===== CHANNEL f1 =====
NUC1          1H
P1           9.00 usec
PL1          0.00 dB
SFO1         500.1325006 MHz
SI           65536
SF           500.1300183 MHz
WDW          EM
SSB          0
LB           0.30 Hz
GB           0
PC           1.00
  
```

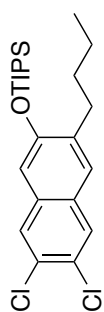

**3c**  
<sup>13</sup>C-NMR in CDCl<sub>3</sub>

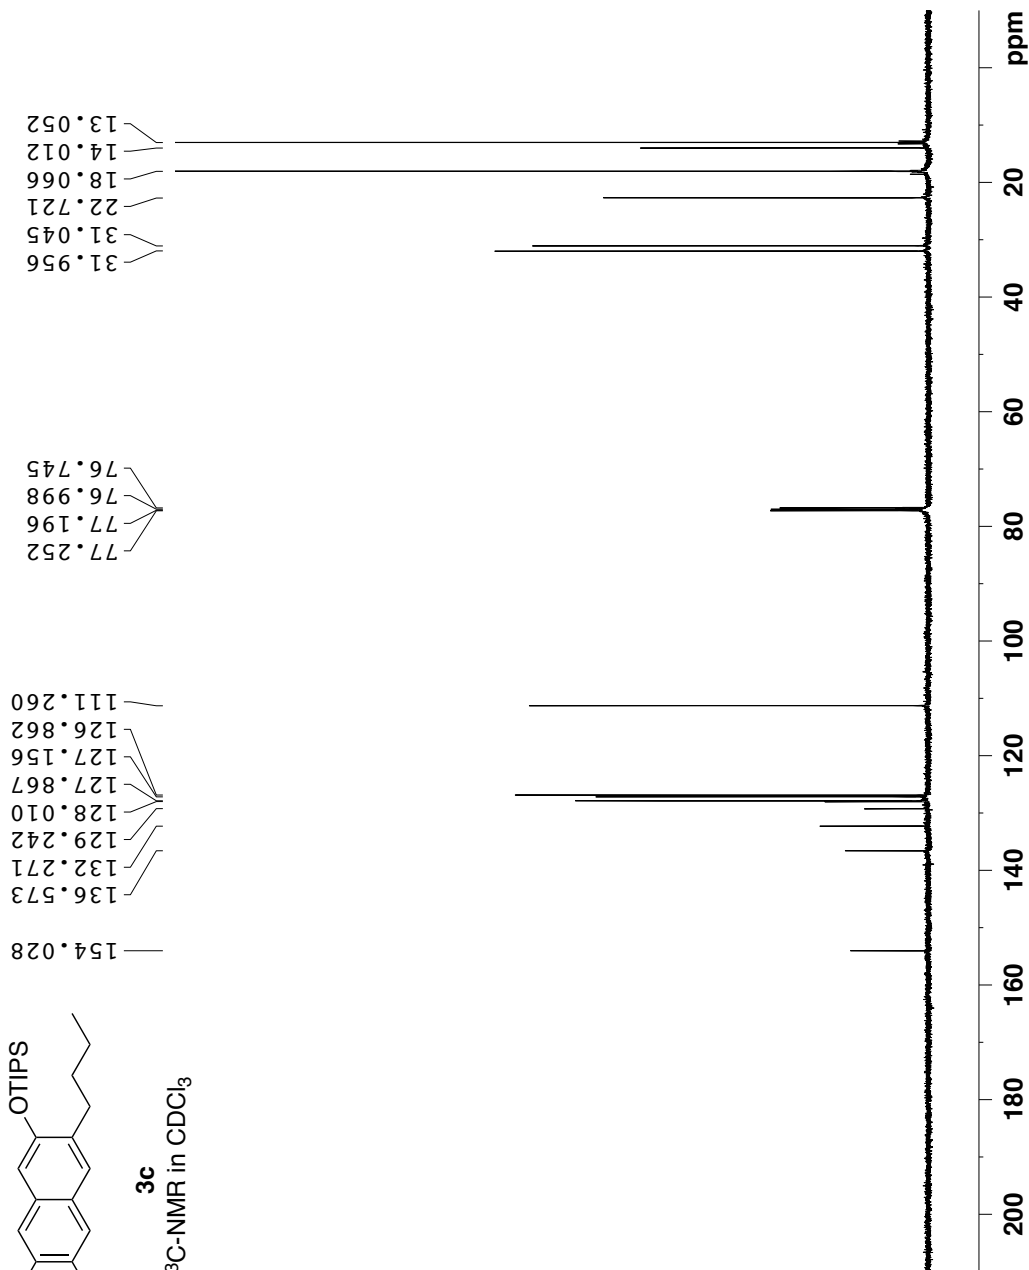

```

NAME          yet.6.262b
EXPNO         2
PROCNO        1
Date_         20110925
Time_         0.09
INSTRUM       spect
PROBHD        5 mm QNP zgh
PULPROG       zgpg30
TD            75184
SOLVENT       CDCl3
NS            996
DS            0
SWH           37593.984 Hz
FIDRES        0.500026 Hz
AQ            0.9999972 sec
RG            8192
DW            15.390 usec
DE            7.300 usec
TE            300.0 K
D1            0.10000000 sec
d11           0.03000000 sec

===== CHANNEL f1 =====
NUC1          13C
P1            4.60 usec
PL1           0.00 dB
SFO1         125.7690572 MHz

===== CHANNEL f2 =====
CPDPRG2       waltz16
NUC2          1H
PCPD2         90.00 usec
PL2           120.00 dB
PL12          19.00 dB
SFO2         500.1320005 MHz
SI            32768
SF           125.7577918 MHz
WDW           EM
SSB           0
LB            1.00 Hz
GB            0
PC            1.40
  
```

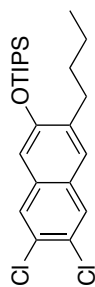

**3c**  
<sup>13</sup>C-NMR in CD<sub>2</sub>Cl<sub>2</sub>

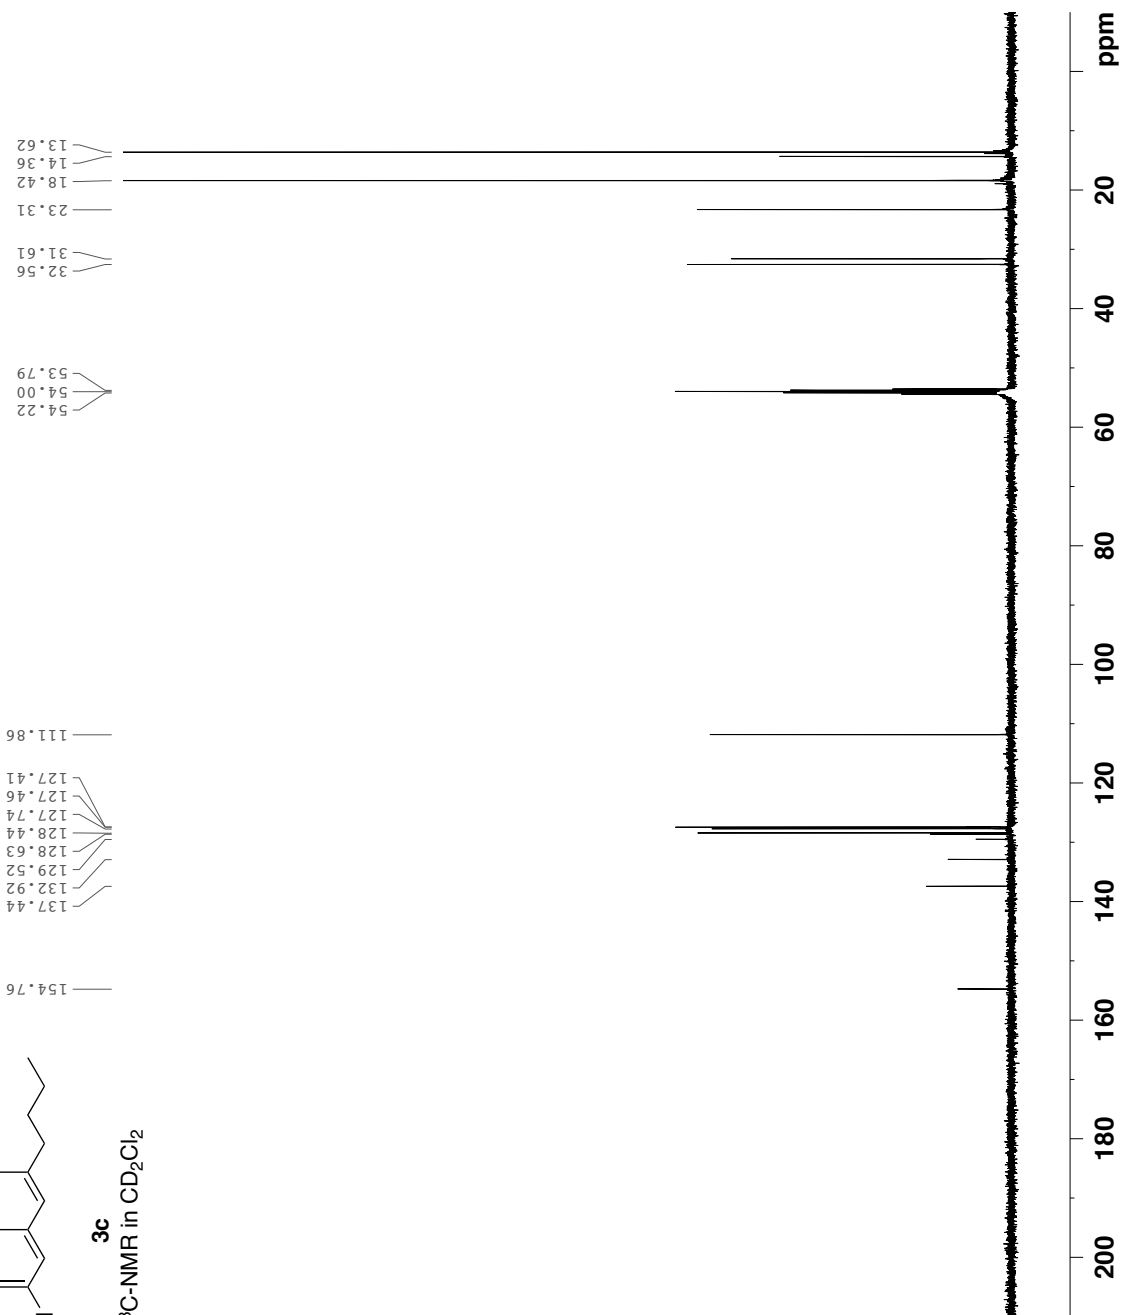

```

NAME yet.6.264a
EXPNO 2
PROCNO 1
Date_ 20120128
Time_ 15.09
INSTRUM spect
PROBHD 5 mm QNP 1H/13
PULPROG zgdc
TD 142854
SOLVENT CD2Cl2
NS 457
DS 0
SWH 30303.031 Hz
FIDRES 0.212126 Hz
AQ 2.3571410 sec
RG 18390.4
DW 16.500 usec
DE 7.50 usec
TE 295.5 K
D1 2.00000000 sec
d11 0.03000000 sec
TD0 1

===== CHANNEL f1 =====
NUC1 13C
PI 8.50 usec
PL1 0.00 dB
SFO1 125.7049802 MHz

===== CHANNEL f2 =====
CPDPRG2 waltz16
NUC2 1H
PCPD2 90.00 usec
PL2 1.00 dB
PL12 21.00 dB
SFO2 499.8734991 MHz
SI 32768
SF 125.6923404 MHz
WDW EM
SSB 0
LB 1.00 Hz
GB 0
PC 1.40
    
```



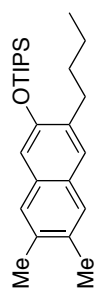

**3d**  
<sup>1</sup>H-NMR in CDCl<sub>3</sub>

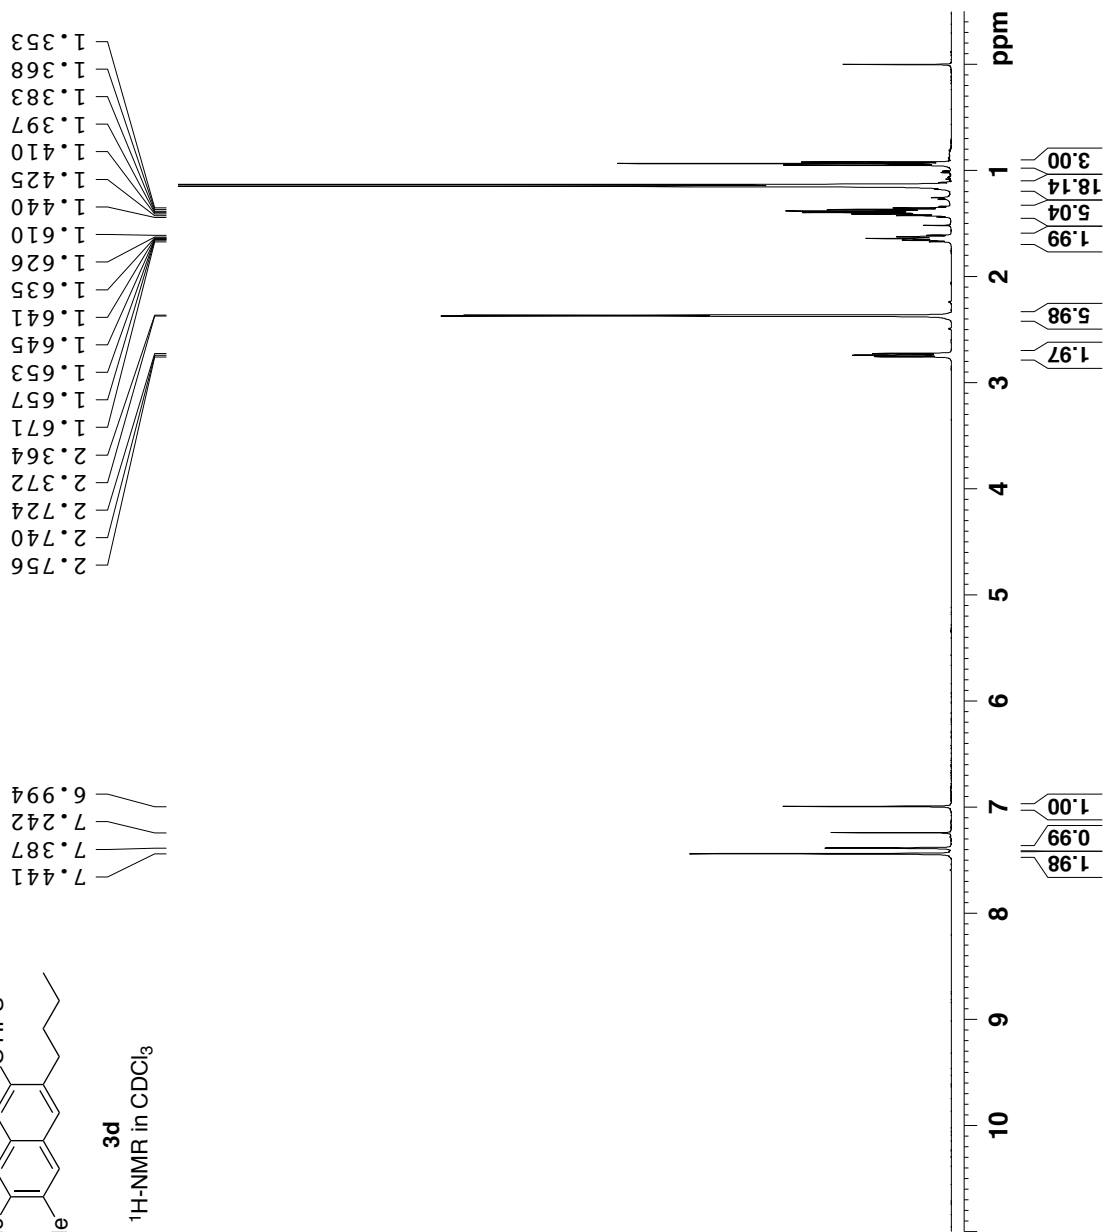

```

Current Data Parameters
NAME          yet.6.267D
EXPNO         1
PROCNO        1

F2 - Acquisition Parameters
Date_         20111001
Time         15.15
INSTRUM      spect
PROBHD       5 mm PABBI 1H/
PULPROG      zg
TD            59998
SOLVENT      CDCl3
NS            4
DS            0
SWH           10000.000 Hz
FIDRES        0.166672 Hz
AQ            2.9999499 sec
RG            28.5
DW            50.000 usec
DE            7.50 usec
TE            295.7 K
D1            10.0000000 sec
TD0           1

===== CHANNEL f1 =====
NUC1          1H
P1            8.70 usec
PL1           0.00 dB
SF01          499.8729992 MHz

F2 - Processing parameters
SI            32768
SF            499.8700270 MHz
WDW           no
SSB           0
LB            0.00 Hz
GB            0
PC            1.00
    
```

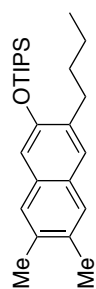

**3d**  
<sup>13</sup>C-NMR in CDCl<sub>3</sub>

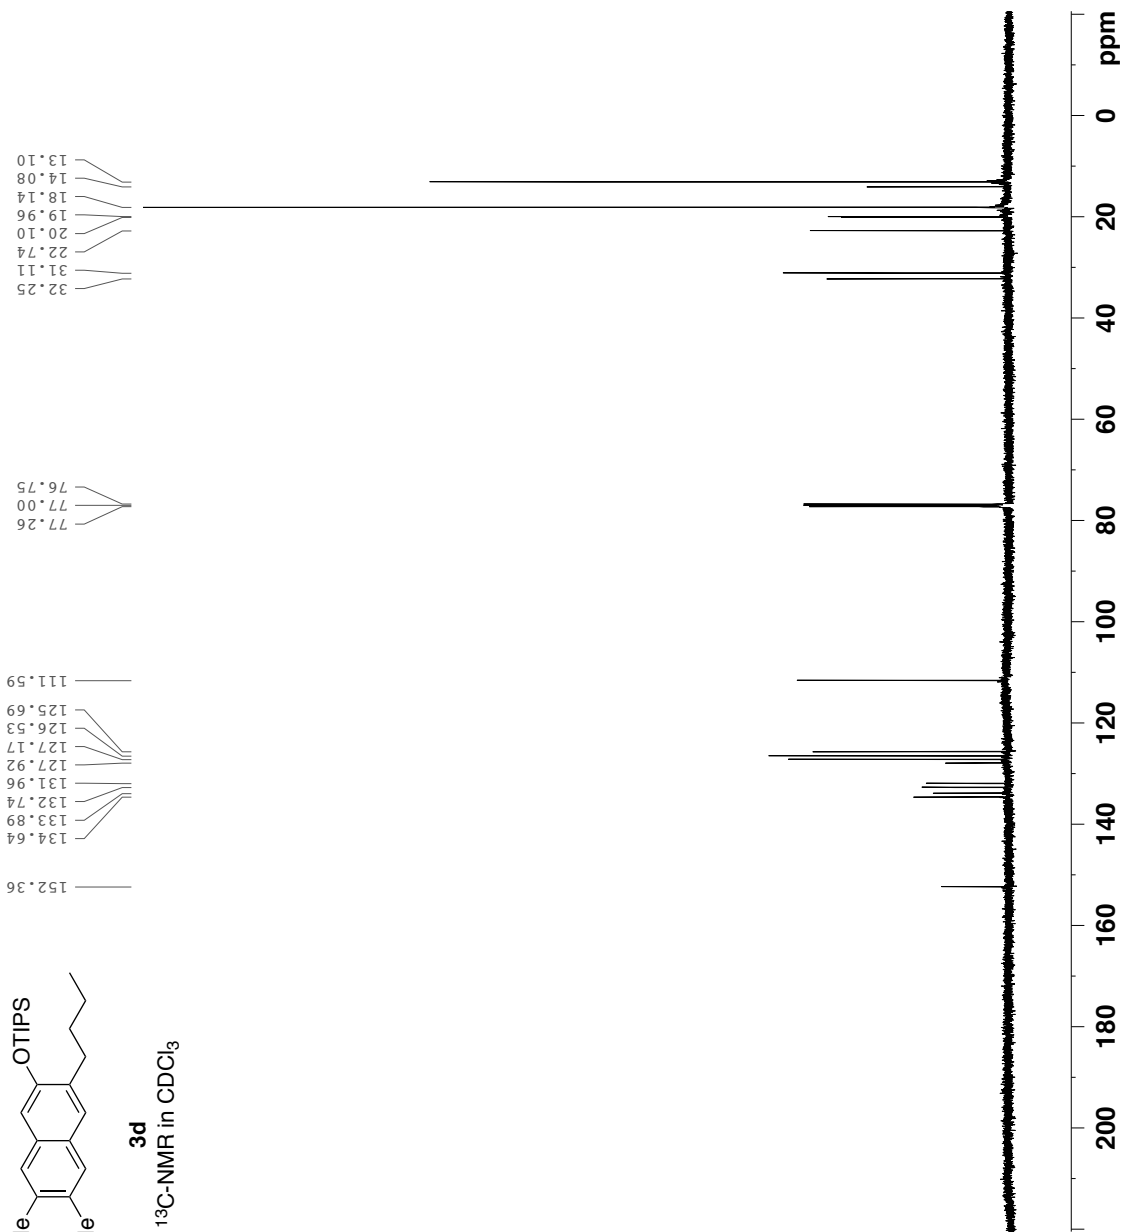

Current Data Parameters  
 NAME yet.6.267b  
 EXPNO 2  
 PROCNO 1

F2 - Acquisition Parameters  
 Date\_ 20111001  
 Time\_ 15.22  
 INSTRUM spect  
 PROBHD 5 mm PABBI 1H/  
 PULPROG zgdc  
 TD 136360  
 SOLVENT CDCl3  
 NS 325  
 DS 0  
 SWH 30303.031 Hz  
 FIDRES 0.222228 Hz  
 AQ 2.2499900 sec  
 RG 18390.4  
 DW 16.500 usec  
 DE 7.50 usec  
 TE 295.9 K  
 D1 2.00000000 sec  
 d11 0.03000000 sec  
 TD0 1

==== CHANNEL f1 =====  
 NUC1 13C  
 P1 12.00 usec  
 PL1 -3.00 dB  
 SFO1 125.7049802 MHz

==== CHANNEL f2 =====  
 CPDPRG2 waltz16  
 NUC2 1H  
 PCPD2 90.00 usec  
 PL2 0.00 dB  
 PL12 28.00 dB  
 SFO2 499.8734991 MHz

F2 - Processing parameters  
 SI 32768  
 SF 125.6924180 MHz  
 WDW EM  
 SSB 0  
 LB 1.00 Hz  
 GB 0  
 PC 1.40

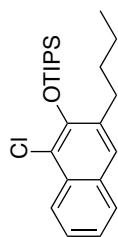

**3e**  
<sup>1</sup>H-NMR in CDCl<sub>3</sub>

```

NAME                               Yet..6..268p
EXPNO                               1
PROCNO                              1
Date_                                20110927
Time_                                18.30
INSTRUM                             spect
PROBHD                               5 mm QNP 1H
PULPROG                             zgpg30
F1                                    400.15
SOLVENT                             CDCl3
NS                                   0
DS                                   0
SWH                                  8012.820 Hz
FIDRES                              0.166670 Hz
AQ                                   2.9999924 sec
RG                                   32
DW                                  62.400 usec
DE                                  4.50 usec
TE                                   300.0 K
TE                                   10.0000000 sec
===== CHANNEL f1 =====
NUC1                                 1H
P1                                   9.00 usec
PL1                                  0.00 dB
SFO1                                500.1325006 MHz
SI                                   65536
SF                                  500.1300201 MHz
WDW                                  EM
GB                                   0
PC                                   1.00
    
```

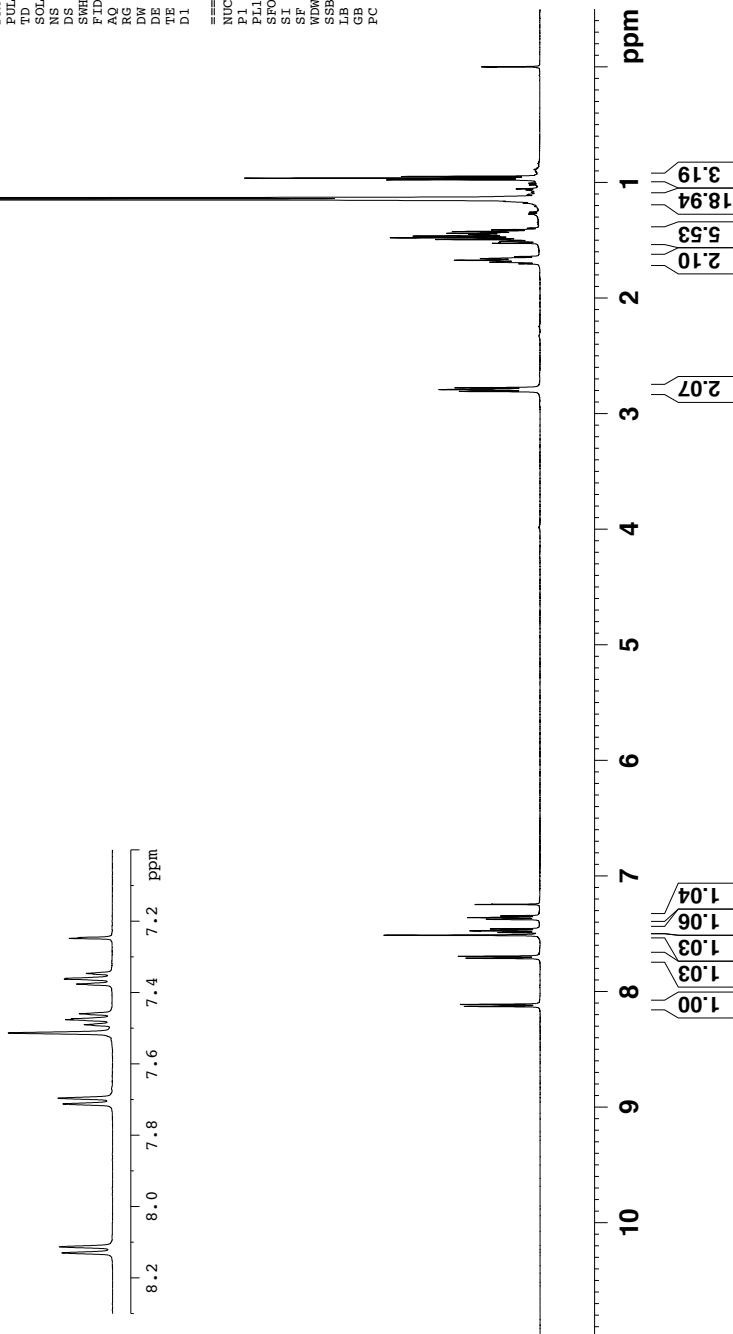

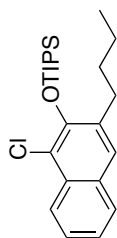

**3e**  
<sup>13</sup>C-NMR in CDCl<sub>3</sub>

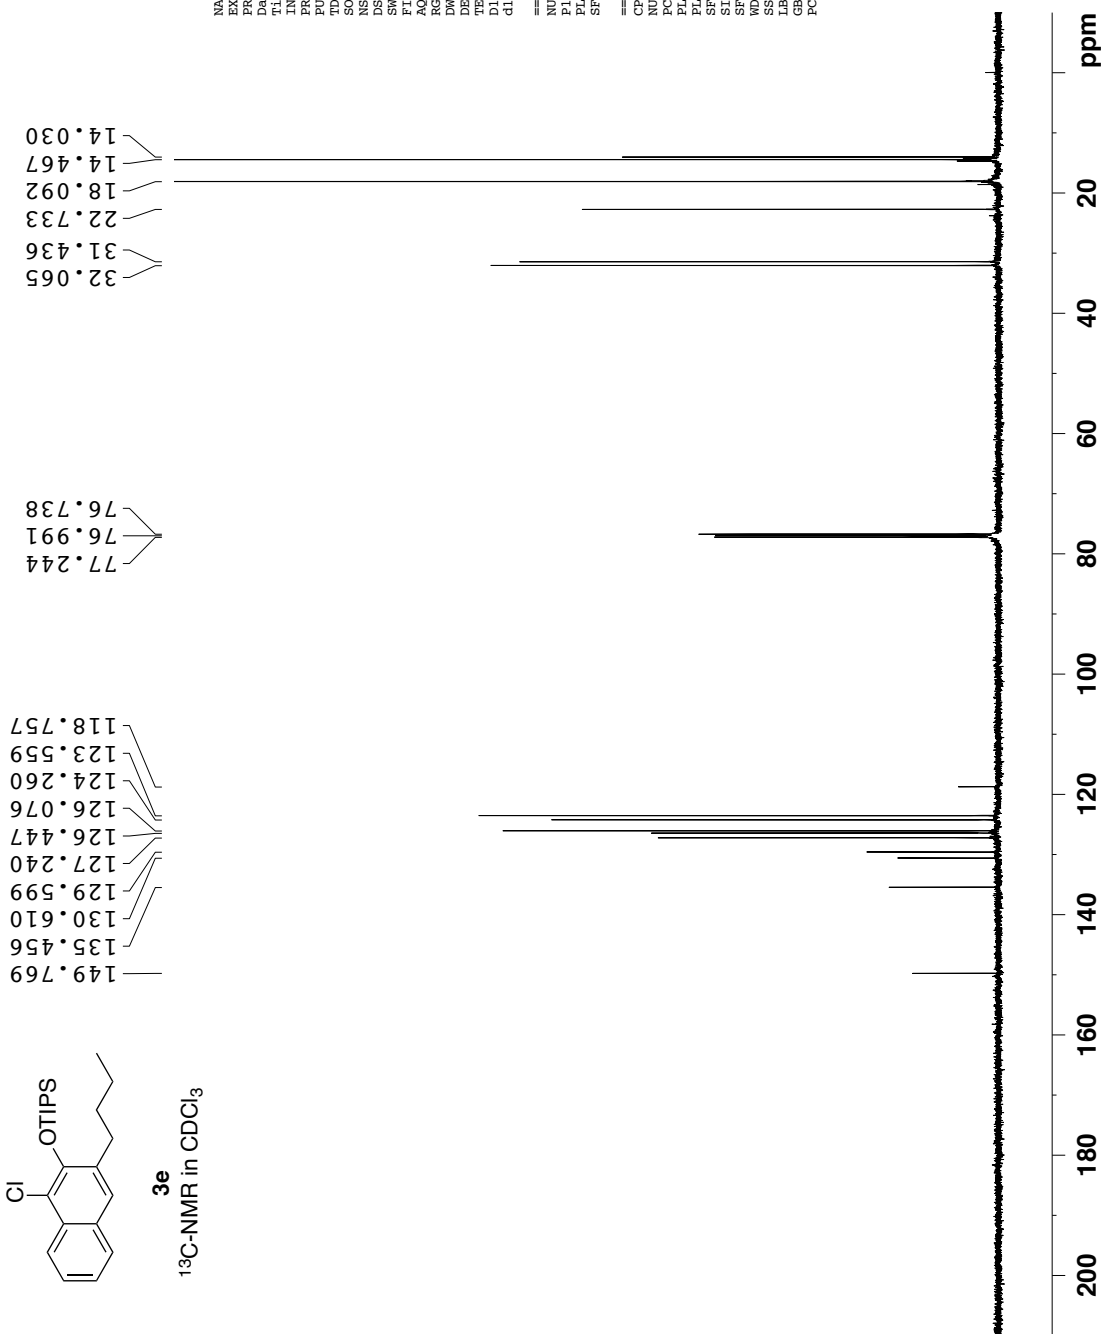

```

NAME          yet.6.268b
EXPNO         2
PROCNO        1
Date_         20110927
Time          18.38
INSTRUM       spect
PROBHD        5 mm QNP 1H
PULPROG       zgpg
TD            75184
SOLVENT       CDCl3
DS            217.0
SWH           37593.984 Hz
FIDRES        0.500026 Hz
AQ            0.9999972 sec
RG            8192
DW            13.300 usec
DE            300.0 K
TE            0.10000000 sec
D1            0.03000000 sec
d11           0.03000000 sec

===== CHANNEL f1 =====
NUC1          13C
P1            4.60 usec
PL1           0.00 dB
SFO1          125.7690572 MHz

===== CHANNEL f2 =====
CPDPRG2       waltz16
NUC2          1H
P2            90.00 usec
PL2           120.00 dB
PL12          19.00 dB
SFO2          500.1320005 MHz
SI            32768
SF            125.7577929 MHz
WDW           EM
SSB           0
LB            1.00 Hz
GB            0
PC            1.40
    
```

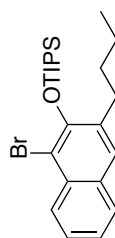

**21**  
<sup>1</sup>H-NMR in CDCl<sub>3</sub>

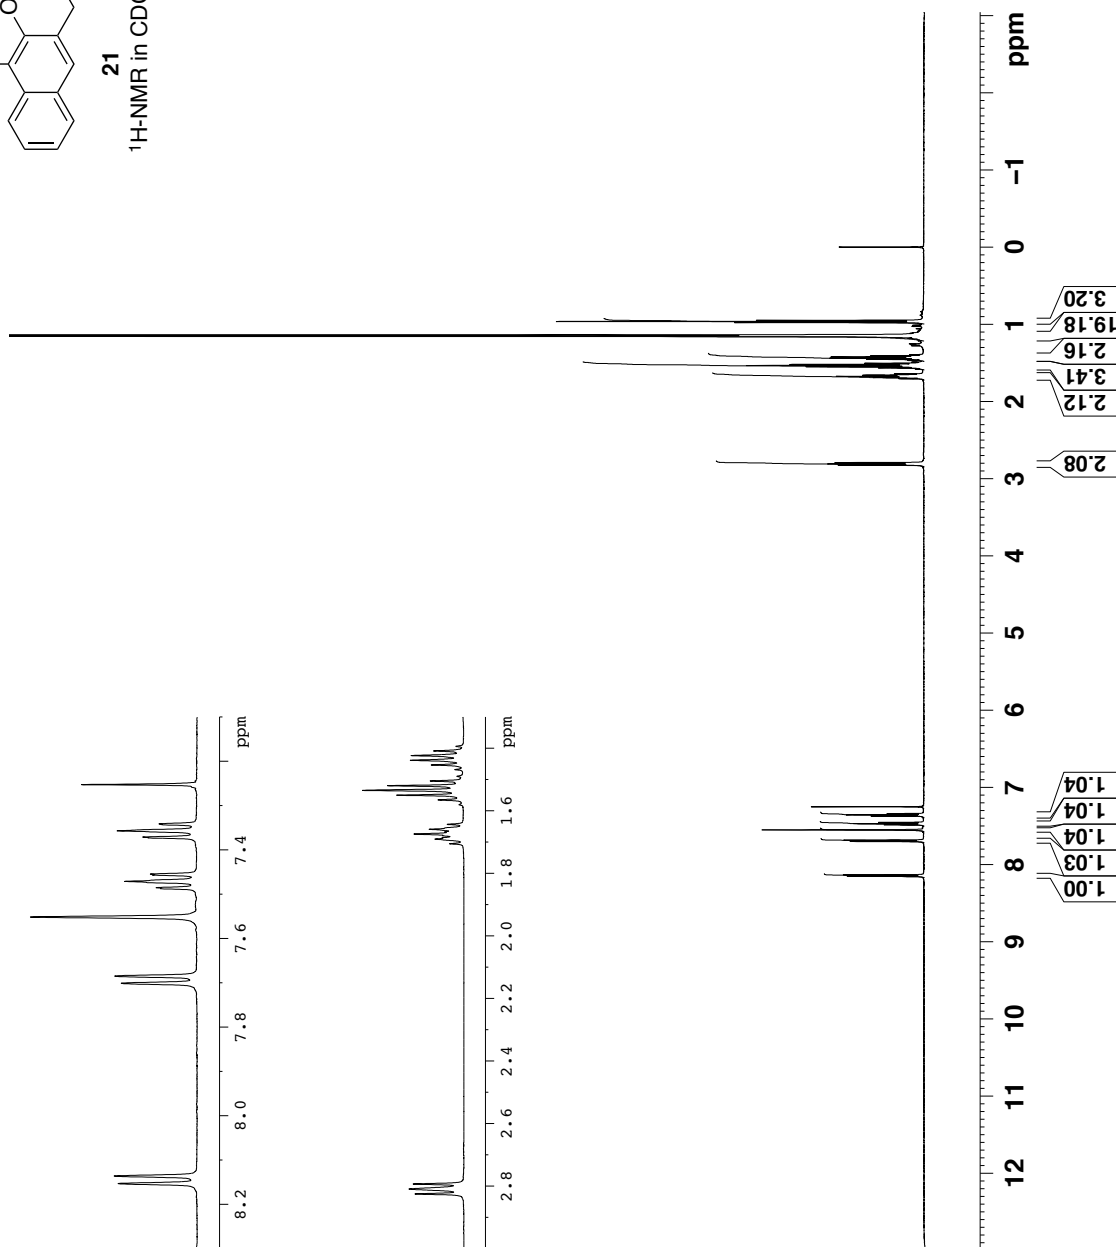

```

NAME      Yet.6.157b
EXPNO    1
PROCNO   1
Date_    20110926
Time     21.46
INSTRUM  spect
PROBHD   5 mm QNP 1H
PULPROG  zg
TD        48076
SOLVENT  CDCl3
NS        4
DS        4
AQ        8012.820 Hz
RG        0.166670 Hz
FIDRES   2.9999924 sec
AQ        64
RG        64
DE        62.400 usec
TE        4.50 usec
TE        300.0 K
D1        10.0000000 sec

===== CHANNEL f1 =====
NUC1      13C
P1        9.00 usec
PL1       0.00 dB
SFO1     500.1325006 MHz
SI        65536
SF        500.1300172 MHz
WDW       EM
SSB       0
LB        0.30 Hz
GB        0
PC        1.00

```

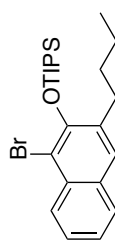

**21**  
<sup>13</sup>C-NMR in CDCl<sub>3</sub>

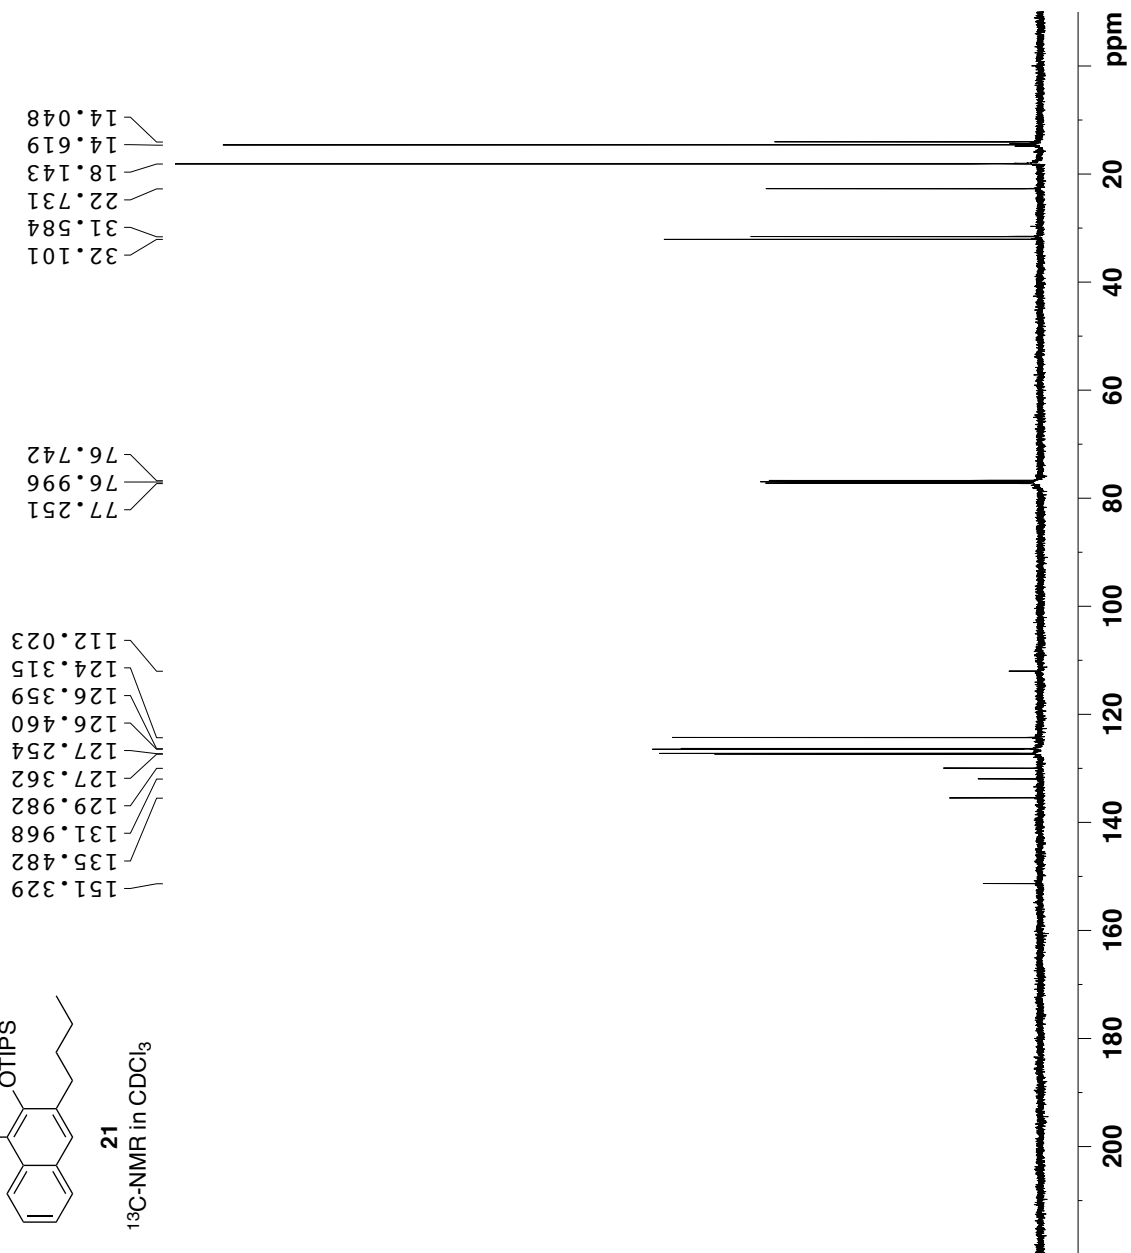

```

NAME                               yet.6.157b
EXPNO                               2
PROCNO                               1
Date_                               20110926
Time_                               21.55
INSTRUM spect
PROBHD 1H
PULPROG zgdc
TD 75184
SOLVENT C606
NS 2033
DS 4
SWH 37593.984 Hz
FIDRES 0.500026 Hz
AQ 0.9999972 sec
RG 4096
DW 13.300 usec
DE 7.50 usec
TE 300.0 K
D1 0.1000000 sec
d11 0.0300000 sec

===== CHANNEL f1 =====
NUC1 13C
P1 4.60 usec
PL1 0.00 dB
SFO1 125.7690572 MHz

===== CHANNEL f2 =====
CPDPRG2 waltz16
NUC2 1H
PCPD2 90.00 usec
PL2 19.00 dB
PL12 19.00 dB
SFO2 500.1320005 MHz
SI 32768
SF 125.7577918 MHz
WDW EM
SSB 0
LB 1.00 Hz
GB 0
PC 1.40
    
```

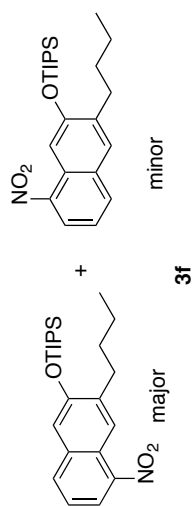

**3f**

1.9:1 regioisomer ratio  
<sup>1</sup>H-NMR in CDCl<sub>3</sub>

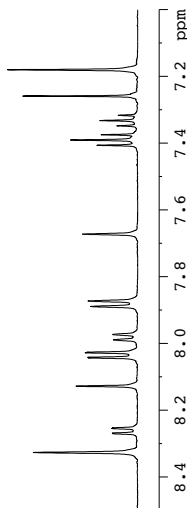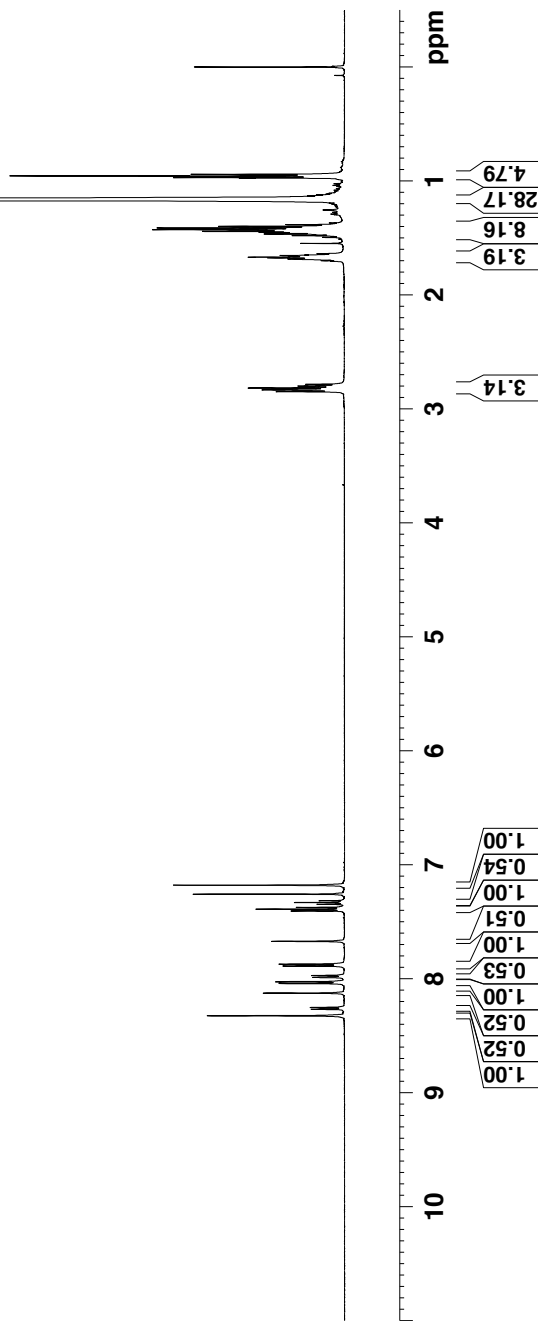

```

NAME                               yet:6.296b3
EXPNO                               1
PROCNO                              1
Date_                               20111118
Time_                               21.58
INSTRUM                             spect
PROBHD                              5 mm QNP 1H
PULPROG                             zgpg30
TD                                   48079
SOLVENT                             CDCl3
NS                                   4
DS                                   0
SWH                                  8012.820 Hz
FIDRES                              0.166670 Hz
AQ                                   2.9999924 sec
RG                                   64
DW                                   62.400 usec
DE                                   4.500 usec
TE                                   300.2
D1                                   15.0000000 sec

===== CHANNEL f1 =====
NUC1                                 1H
P1                                   9.00 usec
PL1                                  0.00 dB
SFO1                                500.1325006 MHz
SI                                   65536
SF                                   500.1300141 MHz
SWH                                  8012.820 Hz
SSB                                  0
LB                                   0.30 Hz
GB                                   0
PC                                   1.00
    
```

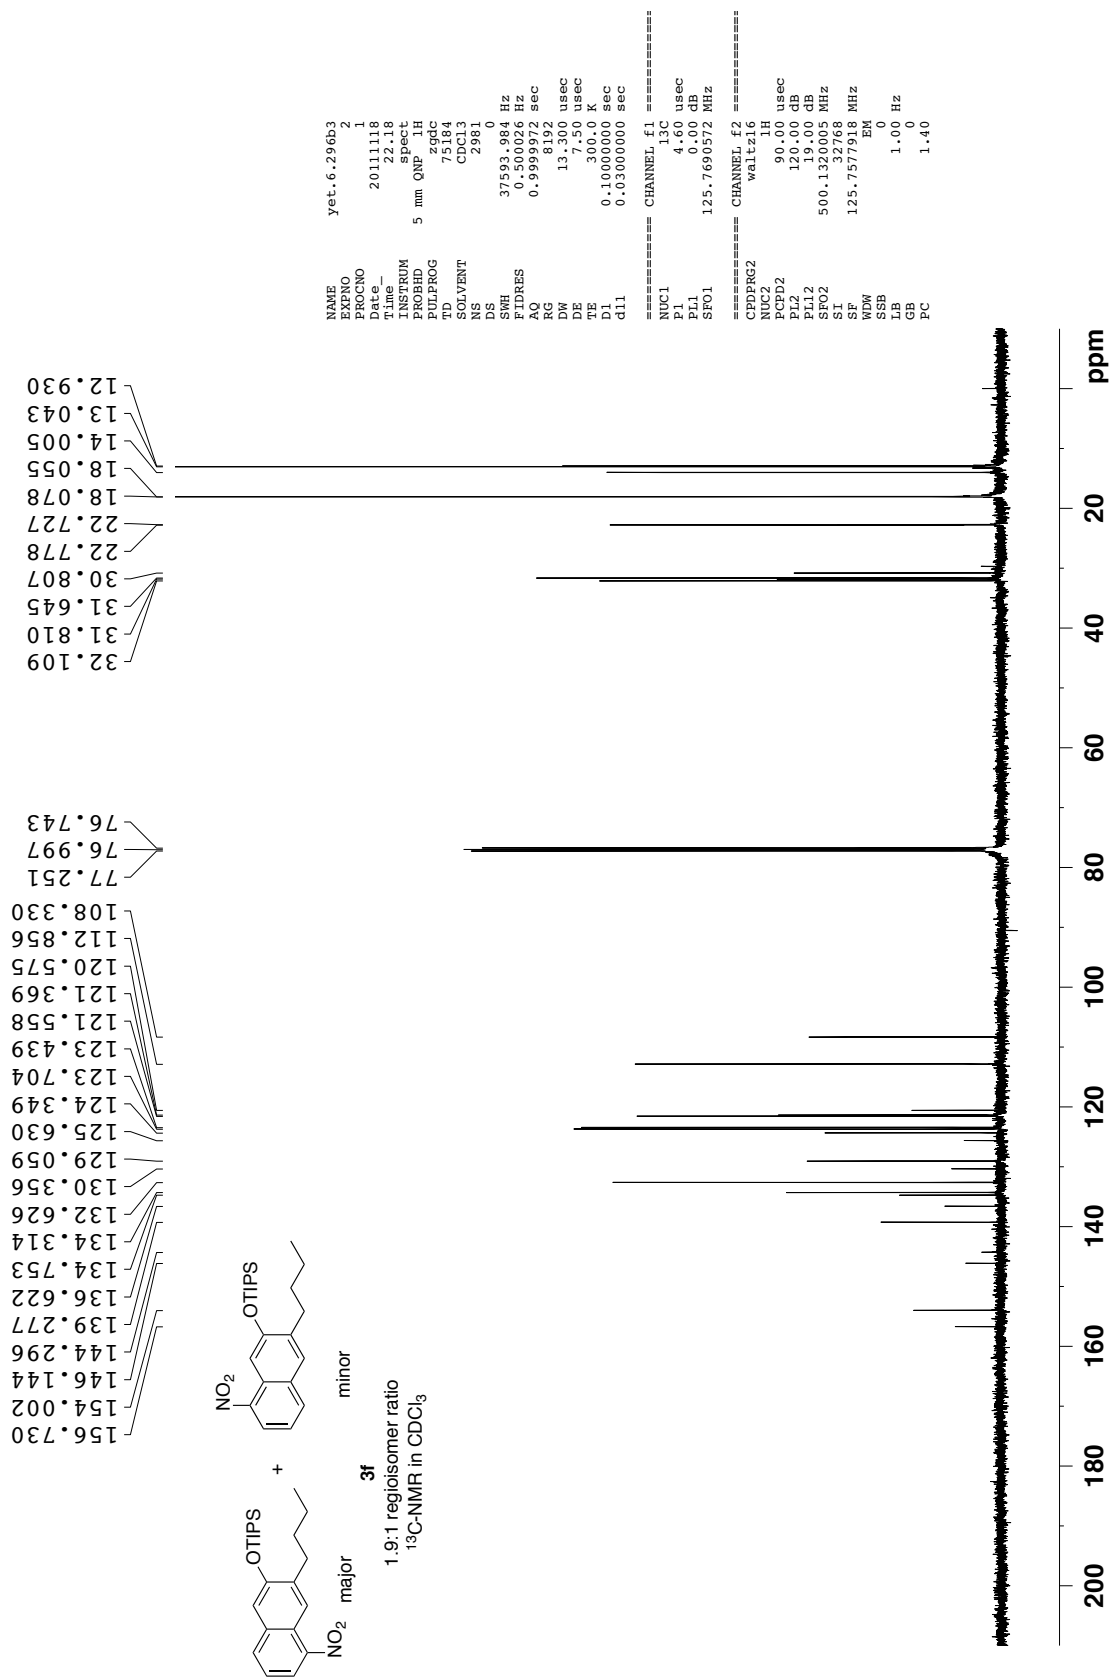



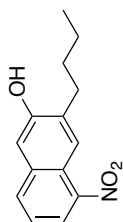

22

<sup>1</sup>H-NMR in CDCl<sub>3</sub>

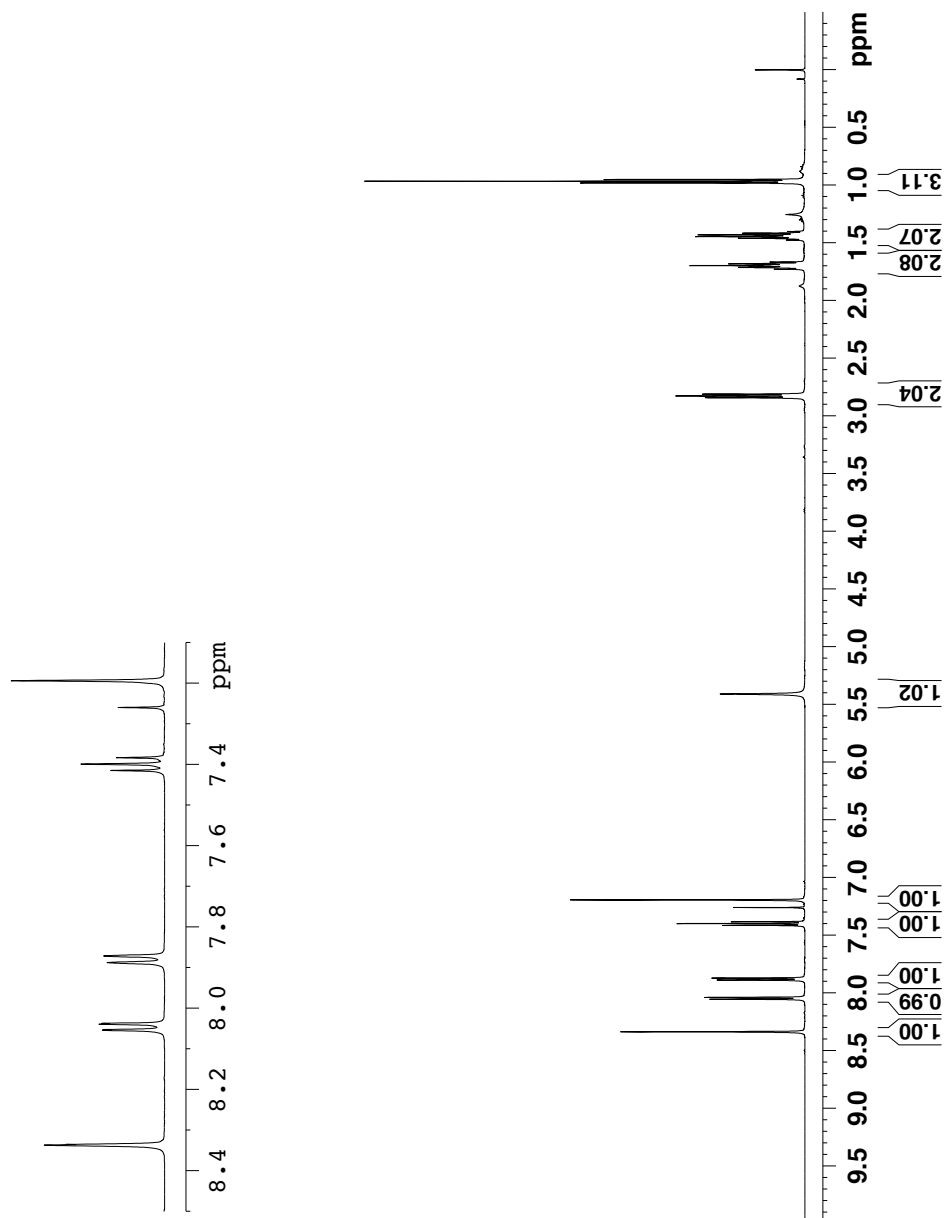

```

NAME                               Yet.7.284b1
EXPNO                               1
PROCNO                              1
Date_                                20120421
Time_                                14.21
INSTRUM                             spect
PROBHD                               5 mm PATXI 1H/
PULPROG                              zg
TD                                   59998
SOLVENT                              CDCl3
NS                                   4
DS                                   0
SWH                                  10000.000 Hz
FIDRES                               0.166672 Hz
AQ                                   2.9999499 sec
RG                                   31.72
DW                                   50.000 usec
DE                                   10.00 usec
TE                                   294.9 K
D1                                   15.00000000 sec
TD0                                  1

===== CHANNEL f1 =====
NUC1                                 1H
P1                                   8.00 usec
SI                                   65536
SF                                   500.1300131 MHz
WDW                                  no
SSB                                   0
LB                                   0.00 Hz
GB                                   0
PC                                   1.00
    
```

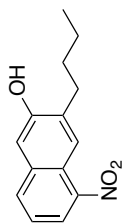

**22**  
<sup>13</sup>C-NMR in CDCl<sub>3</sub>

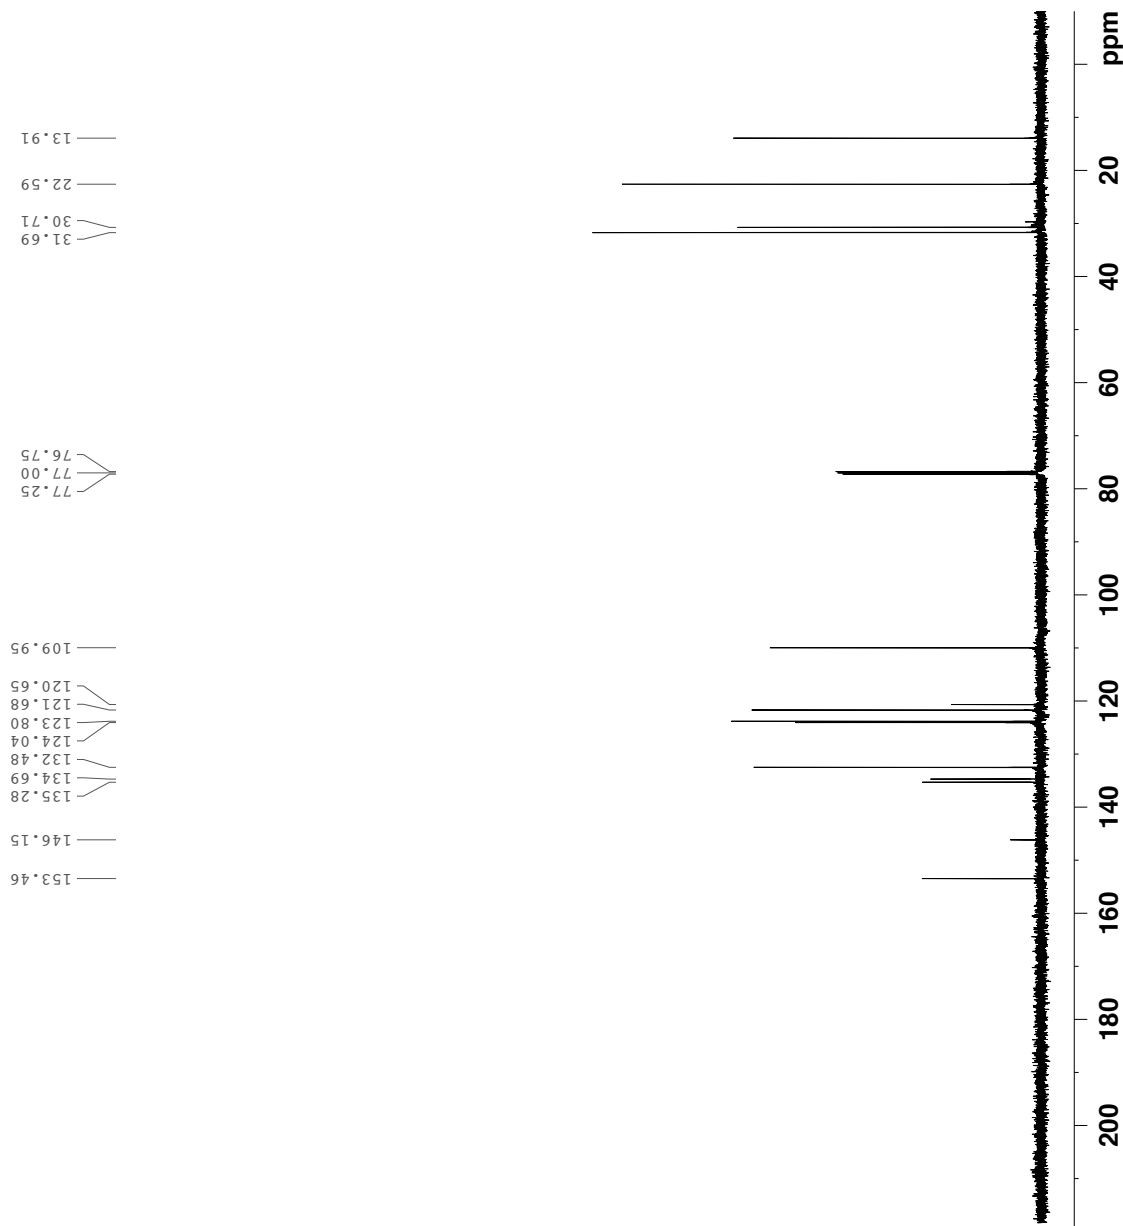

```

NAME      yet.7.284b
EXPNO     2
PROCNO    1
Date_     20120420
Time_     19.27
INSTRUM   spect
PROBHD    5 mm PAXI 1H/
PULPROG   zgdc
TD         178568
SOLVENT    CDCl3
NS         395
DS         0
SWH        29761.904 Hz
FIDRES     0.166670 Hz
AQ         2.9999924 sec
RG         196.79
DW         16.800 usec
DE         10.00 usec
TE         296.0 K
D1         2.00000000 sec
D11        0.03000000 sec
TD0        1

===== CHANNEL f1 =====
NUC1       13C
P1         14.00 usec
SI         131072
SF         125.7577942 MHz
WDW        EM
SSB        0
LB         1.00 Hz
GB         0
PC         1.40
    
```

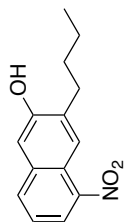

**22**

NOESY in CDCl<sub>3</sub>

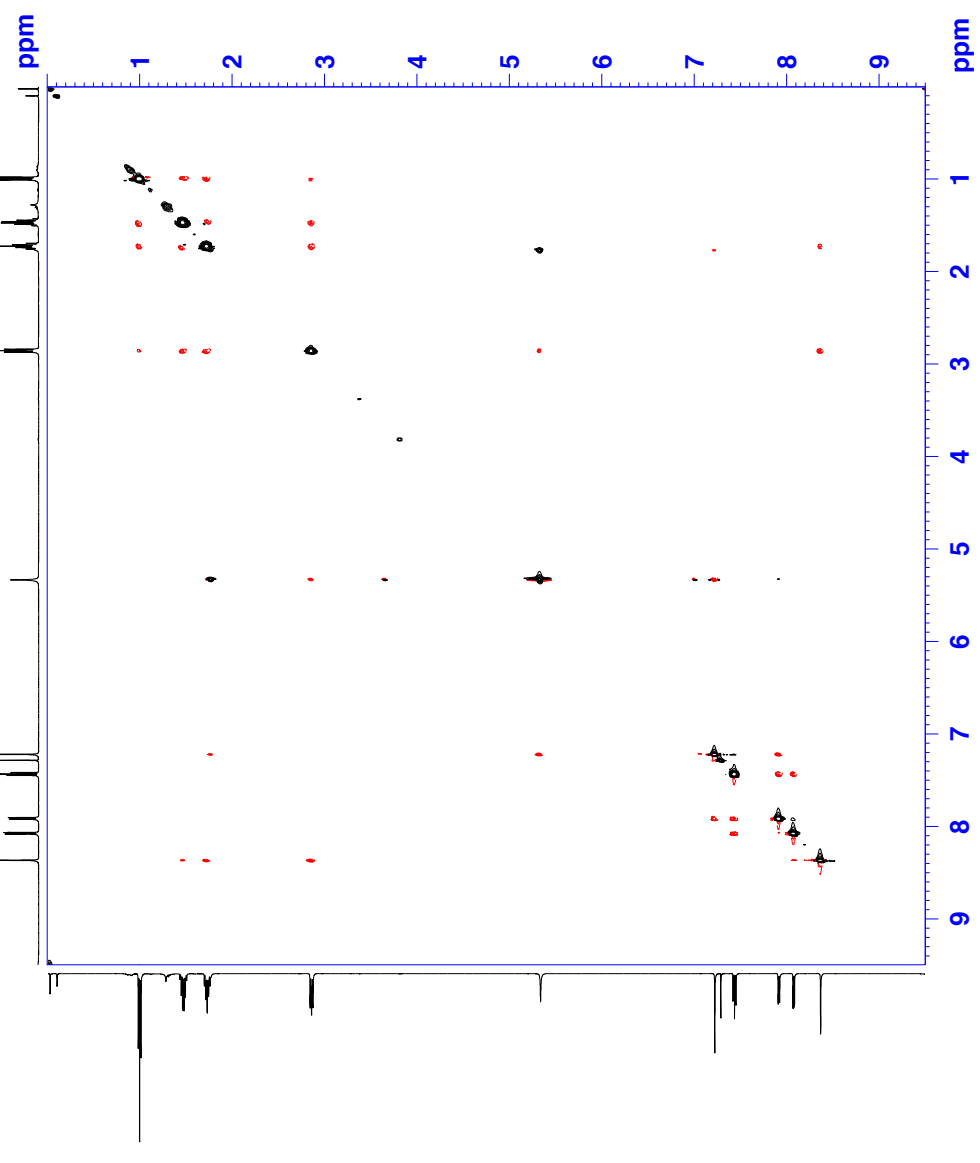

```

NAME yet.7.293a1
EXPNO 3
PROCNO 1
Date_ 20120425
Time_ 22.08
INSTRUM spect
PROBHD 5 mm PATXI 1H/
PULPROG noesygpphpp
TD 2048
SOLVENT CDCl3
NS 8
DS 16
SWH 4746.835 Hz
FIDRES 2.317791 Hz
AQ 0.2157727 sec
RG 97.37
DE 105.333 usec
TE 294.3 K
D0 0.00009473 sec
D1 5.13000011 sec
D8 2.70499992 sec
D11 0.03000000 sec
D12 0.00002000 sec
D16 0.00020000 sec
IN0 0.00021045 sec

===== CHANNEL f1 =====
NUC1 1H
P1 8.25 usec
P2 16.50 usec
P7 2500.00 usec
ND0 1
TD 256
SF01 500.1324 MHz
FIDRES 18.559549 Hz
SW 9.500 ppm
FMODE States-TPPI
SI 1024
SF 500.1300000 MHz
WDW QSI
SSB 2
LB 0.00 Hz
GB 0
PC 1.00
SI 1024
MC2 States-TPPI
SF 500.1300000 MHz
WDW QSI
SSB 2
LB 0.00 Hz
GB 0
    
```

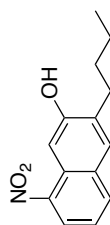

23

<sup>1</sup>H-NMR in CDCl<sub>3</sub>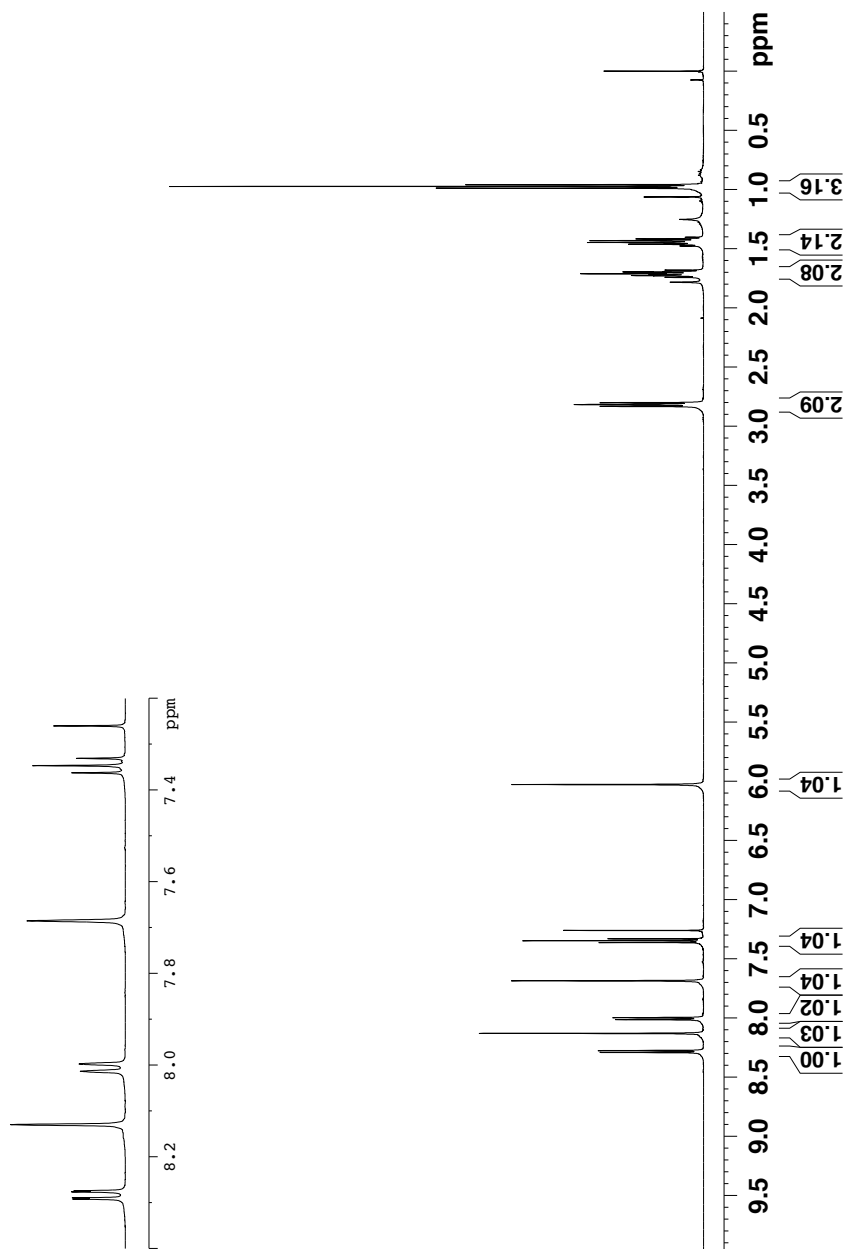

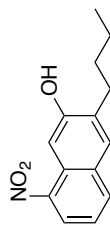

**23**  
<sup>13</sup>C-NMR in CDCl<sub>3</sub>

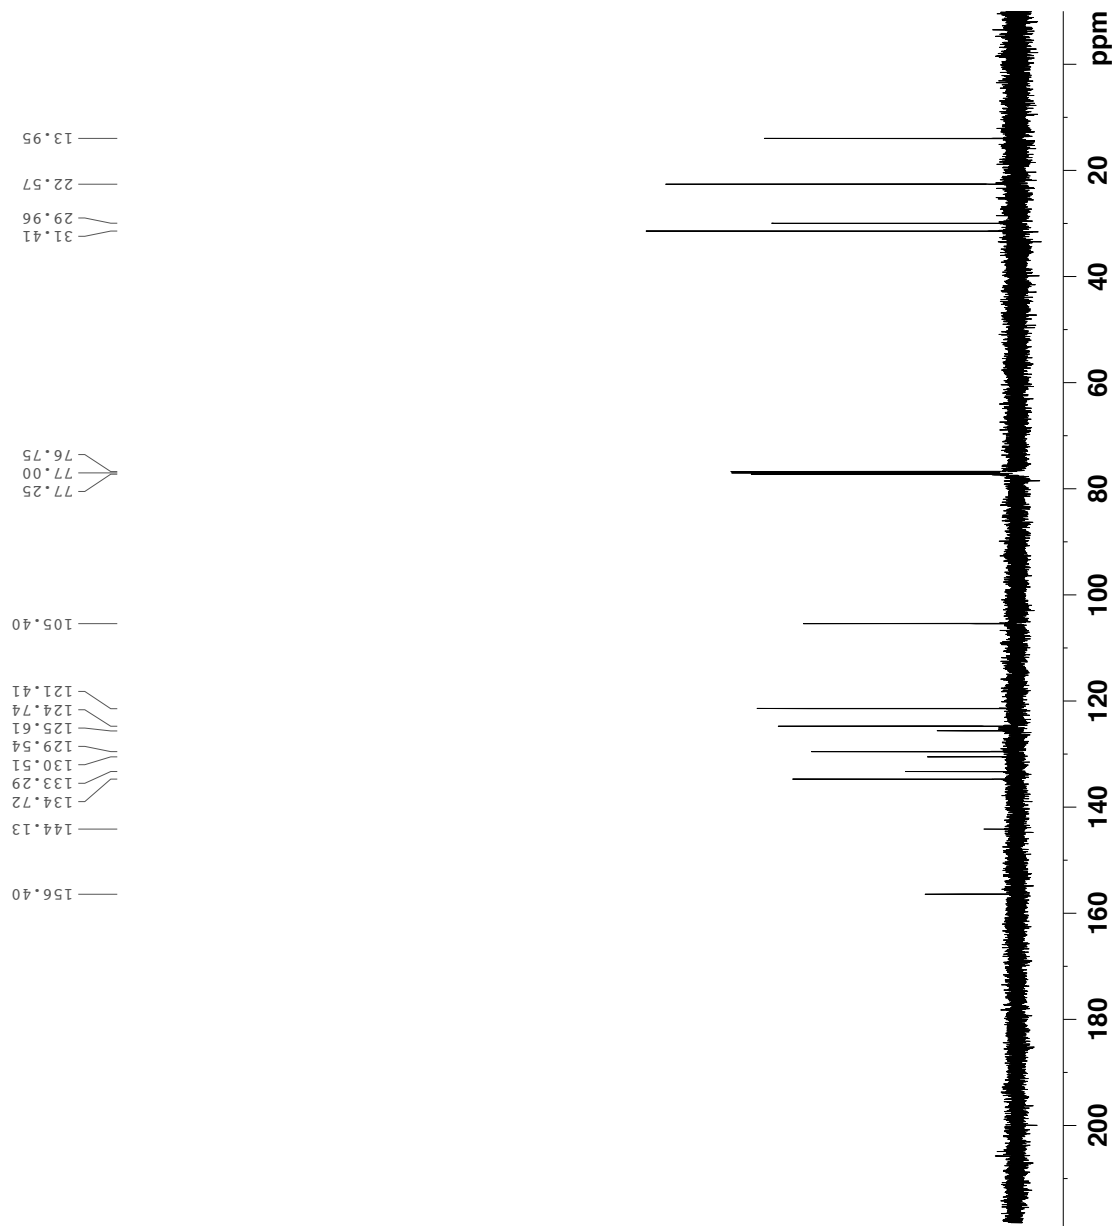

```

NAME          yet.7.284c1
EXPNO         2
PROCNO        1
Date_         20120421
Time_         19.14
INSTRUM       spect
PROBHD        5 mm PAXI 1H/
PULPROG       zgdc
TD            178568
SOLVENT       CDCl3
NS            401
DS            0
SWH           29761.904 Hz
FIDRES        0.166670 Hz
AQ            2.9999924 sec
RG            196.79
DW            16.800 usec
DE            10.00 usec
TE            296.3 K
D1            2.0000000 sec
D11           0.0300000 sec
TD0           1

===== CHANNEL f1 =====
NUC1          13C
P1            14.00 usec
SI            131072
SF            125.7577925 MHz
WDW           EM
SSB           0
LB            1.00 Hz
GB            0
PC            1.40
    
```

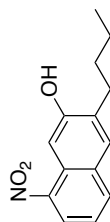

23

NOESY in CDCl<sub>3</sub>

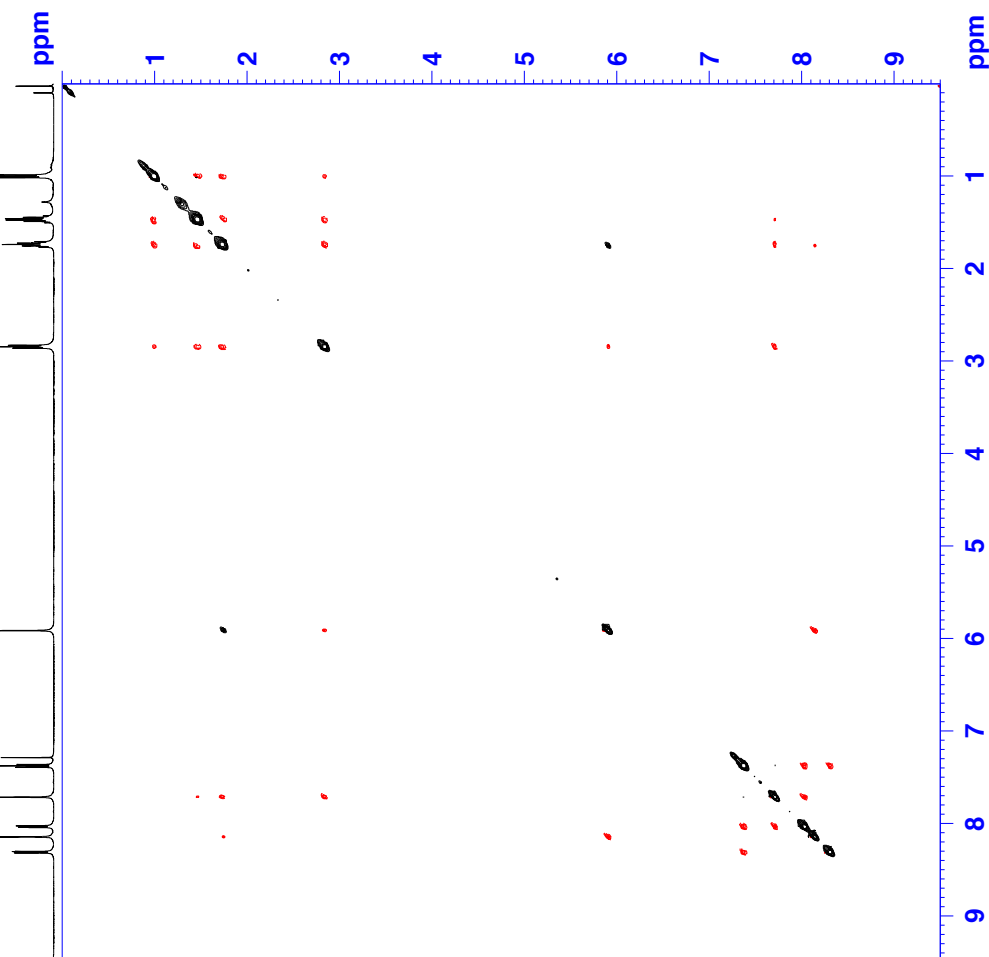

```

NAME yet.7.294a1
EXPNO 4
PROCNO 1
Date_ 20120427
Time 21.31
INSTRUM spect
PROBHD 5 mm PATXI 1H/
PULPROG noesygpphpp
TD 2048
SOLVENT CDCl3
NS 16
DS 16
SWH 4746.835 Hz
FIDRES 2.317791 Hz
AQ 0.2157727 sec
RG 126.24
DW 105.333 usec
DE 10.00 usec
TE 294.7 K
D0 0.00009486 sec
D1 5.1300011 sec
D8 2.70499992 sec
D11 0.03000000 sec
D12 0.00020000 sec
D16 0.00020000 sec
IN0 0.00021045 sec

===== CHANNEL f1 =====
NUC1 1H
P1 8.15 usec
P2 16.30 usec
P17 2500.00 usec
ND0 1
TD 256
SF01 500.1324 MHz
FIDRES 18.559549 Hz
SW 9.500 ppm
FnmODE States-TPPI
SI 1024
SF 500.1300000 MHz
WDW QSINE
SSB 2
LB 0.00 Hz
GB 0
PC 1.00
SI 1024
MC2 States-TPPI
SF 500.1300000 MHz
WDW QSINE
SSB 2
LB 0.00 Hz
GB 0
    
```

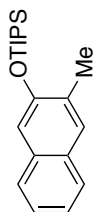

**3g**  
<sup>1</sup>H-NMR in CDCl<sub>3</sub>

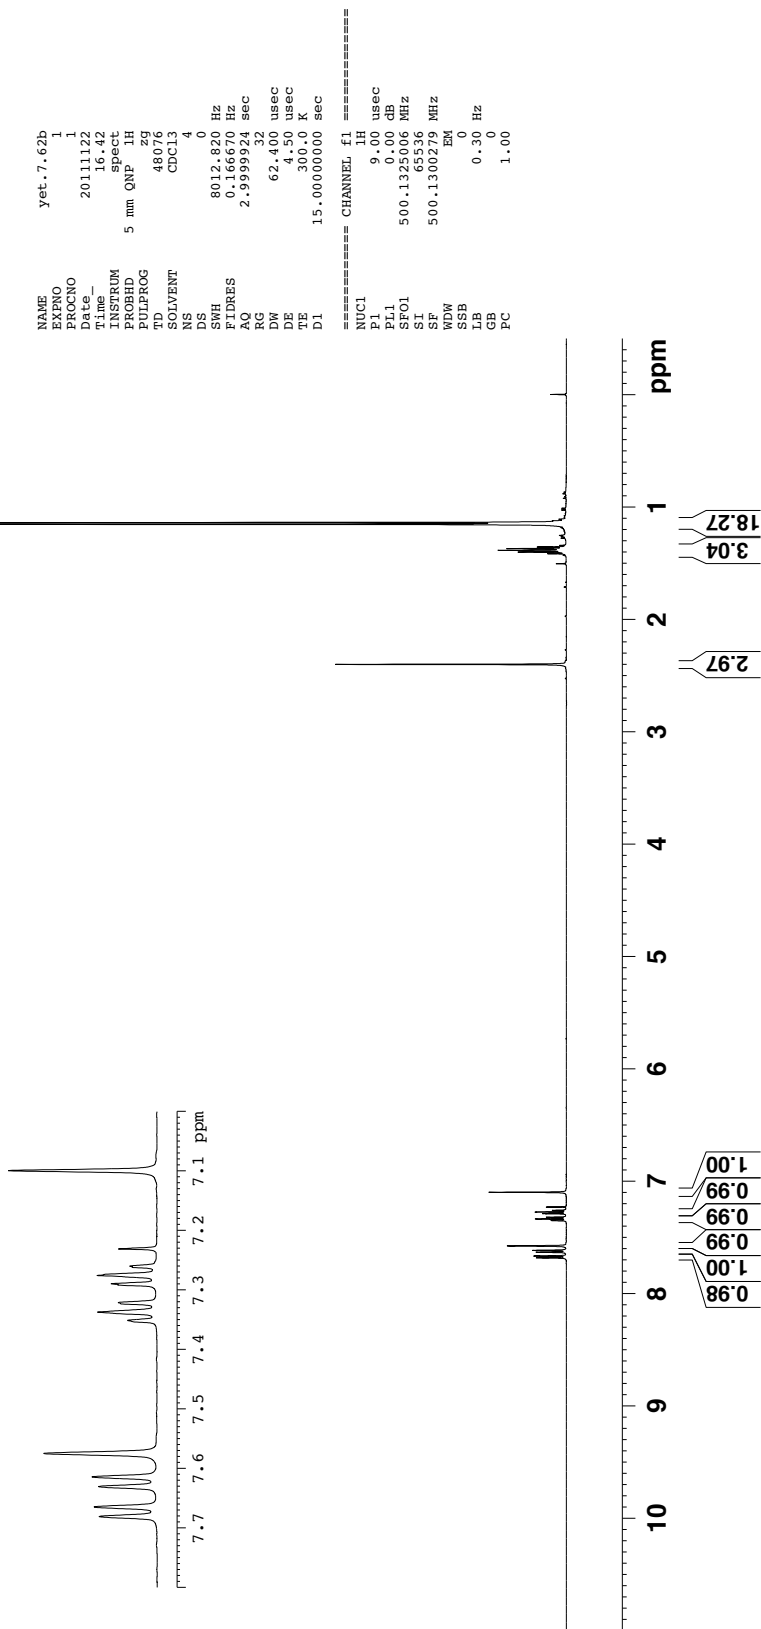

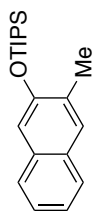

**3g**  
<sup>13</sup>C-NMR in CDCl<sub>3</sub>

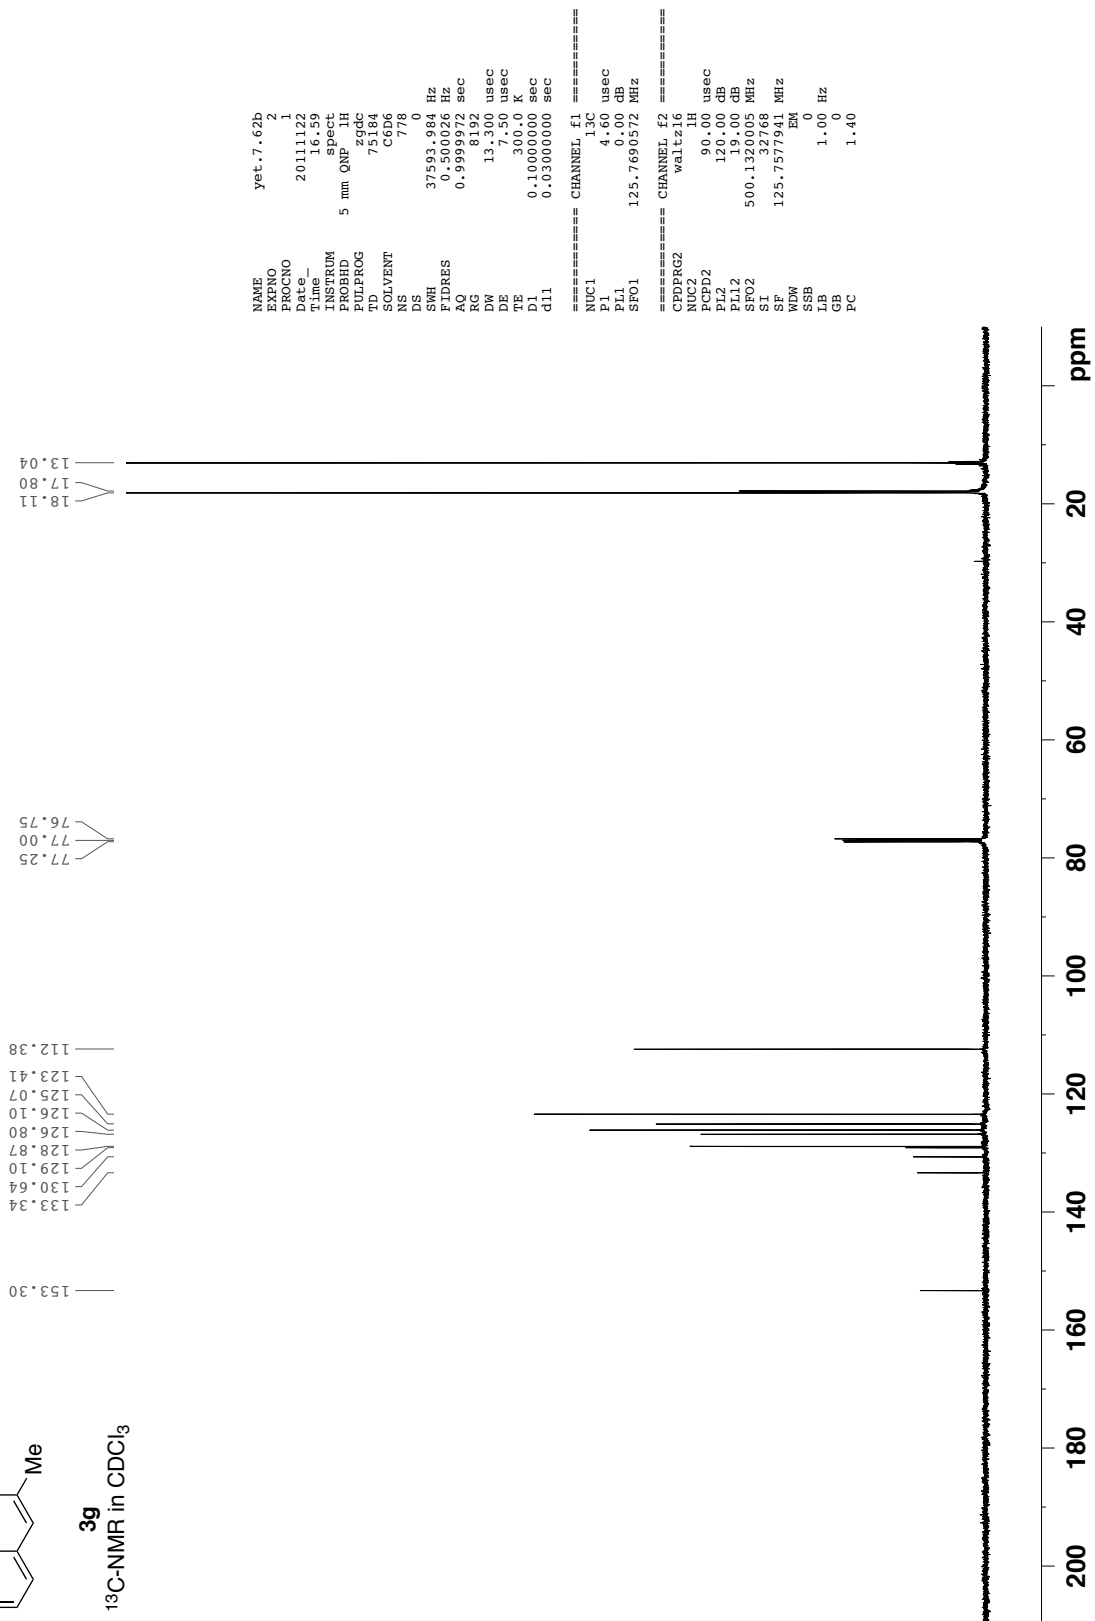



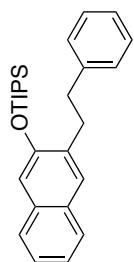

**3h**  
<sup>1</sup>H-NMR in CDCl<sub>3</sub>

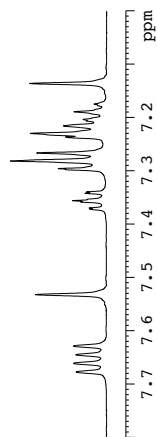

```

NAME                               yet..7..56b
EXPNO                               1
PROCNO                              1
Date_                               20111118
Time                                23.10
INSTRUM                             spect
PROBHD                               5 mm QNP 1H
PULPROG                             zgpg30
SOLVENT                             CDCl3
NS                                   4
DS                                   0
SWH                                  8012.820 Hz
FIDRES                              0.166670 Hz
AQ                                   2.9999924 sec
RG                                   64
DW                                   62.400 usec
DE                                   18.30 usec
TE                                   300.2 K
D1                                   15.00000000 sec

===== CHANNEL f1 =====
NUC1                                 1H
P1                                   9.00 usec
PL1                                  0.00 dB
SFO1                                500.1325006 MHz
SI                                   65536
SF                                      500.1300248 MHz
WDW                                   EM
SSB                                   0
LB                                   0.30 Hz
GB                                   0
PC                                   1.00
    
```

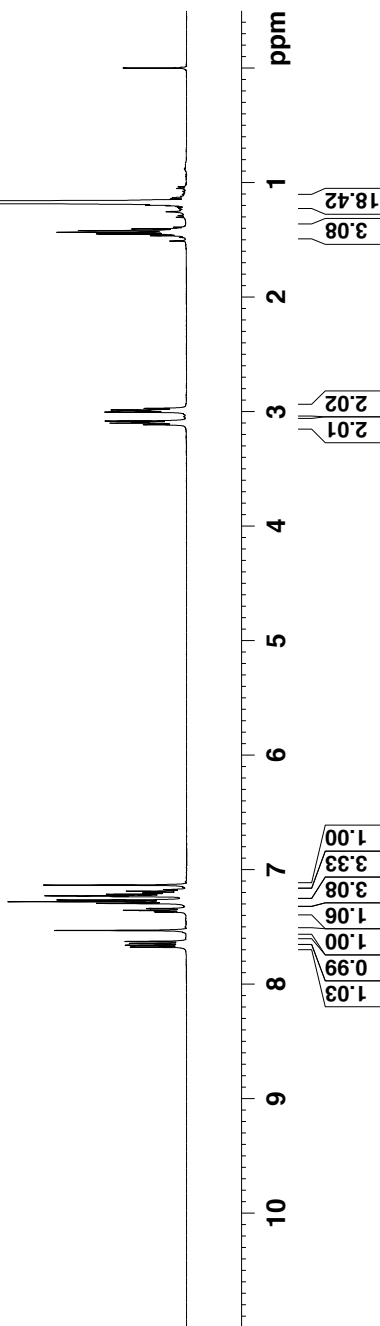

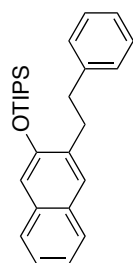

**3h**  
<sup>13</sup>C-NMR in CDCl<sub>3</sub>

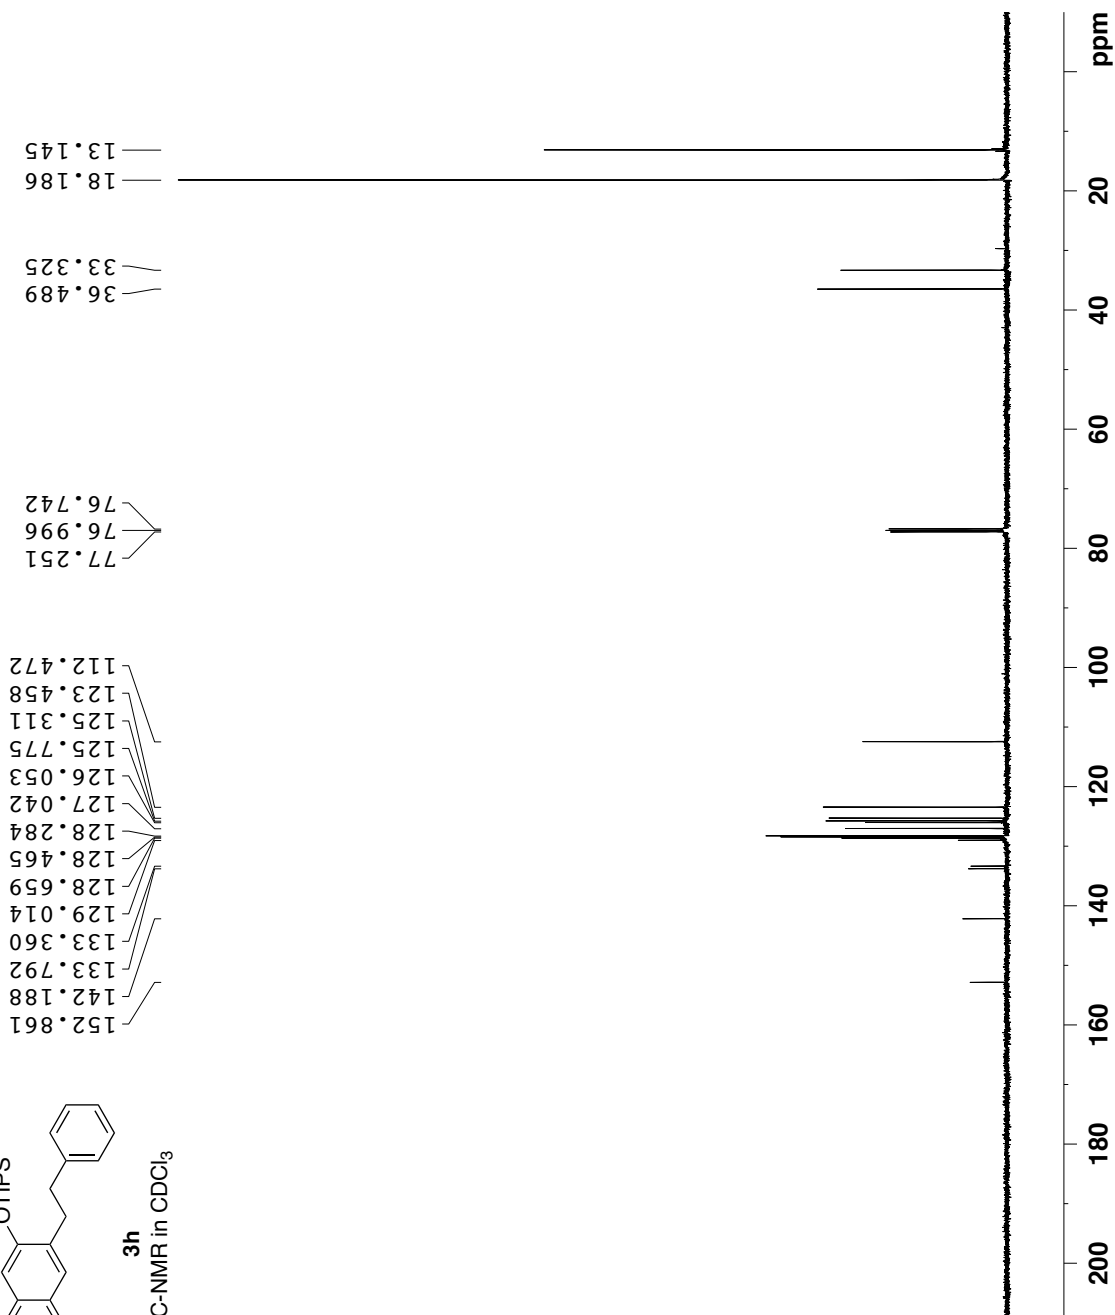

```

NAME                               yet.7.56b
EXPNO                               2
PROCNO                               1
Date_                               20111118
Time                                 23.20
INSTRUM                             spect
PROBHD                               5 mm QNP
PULPROG                             zgpg30
TD                                   65536
SOLVENT                               CDCl3
NS                                   682
DS                                   0
SWH                                  37593.984 Hz
FIDRES                               0.500026 Hz
AQ                                   0.9999972 sec
RG                                   8192
DW                                  13.300 usec
DE                                   0.0000000 sec
TE                                   300.2 K
D1                                   0.10000000 sec
d11                                  0.03000000 sec

===== CHANNEL f1 =====
NUC1                                  13C
P1                                   4.60 usec
PL1                                  0.00 dB
SFO1                                 125.7690572 MHz

===== CHANNEL f2 =====
CPDPRG2                             wait416
NUC2                                  1H
P2                                   90.00 usec
PL2                                  120.00 dB
PL12                                 19.00 dB
SFO2                                 500.1320005 MHz
SI                                   32768
WDW                                   EM
SSB                                   0
GB                                   0
PC                                   1.40
    
```

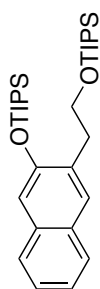

**3i**  
<sup>1</sup>H-NMR in CDCl<sub>3</sub>

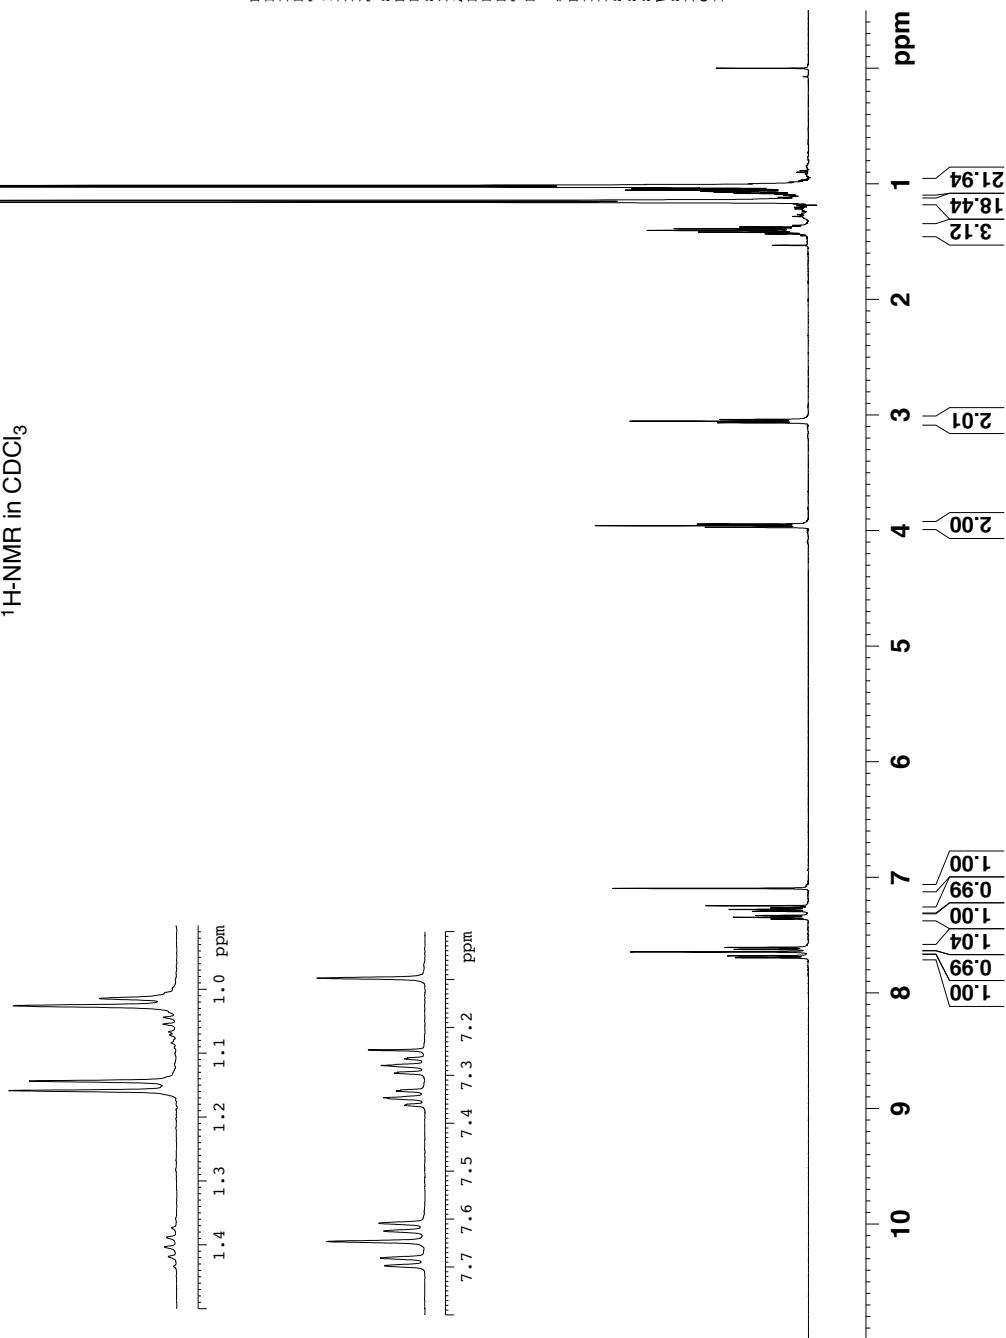

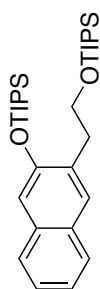

**3i**  
 $^{13}\text{C-NMR}$  in  $\text{CDCl}_3$

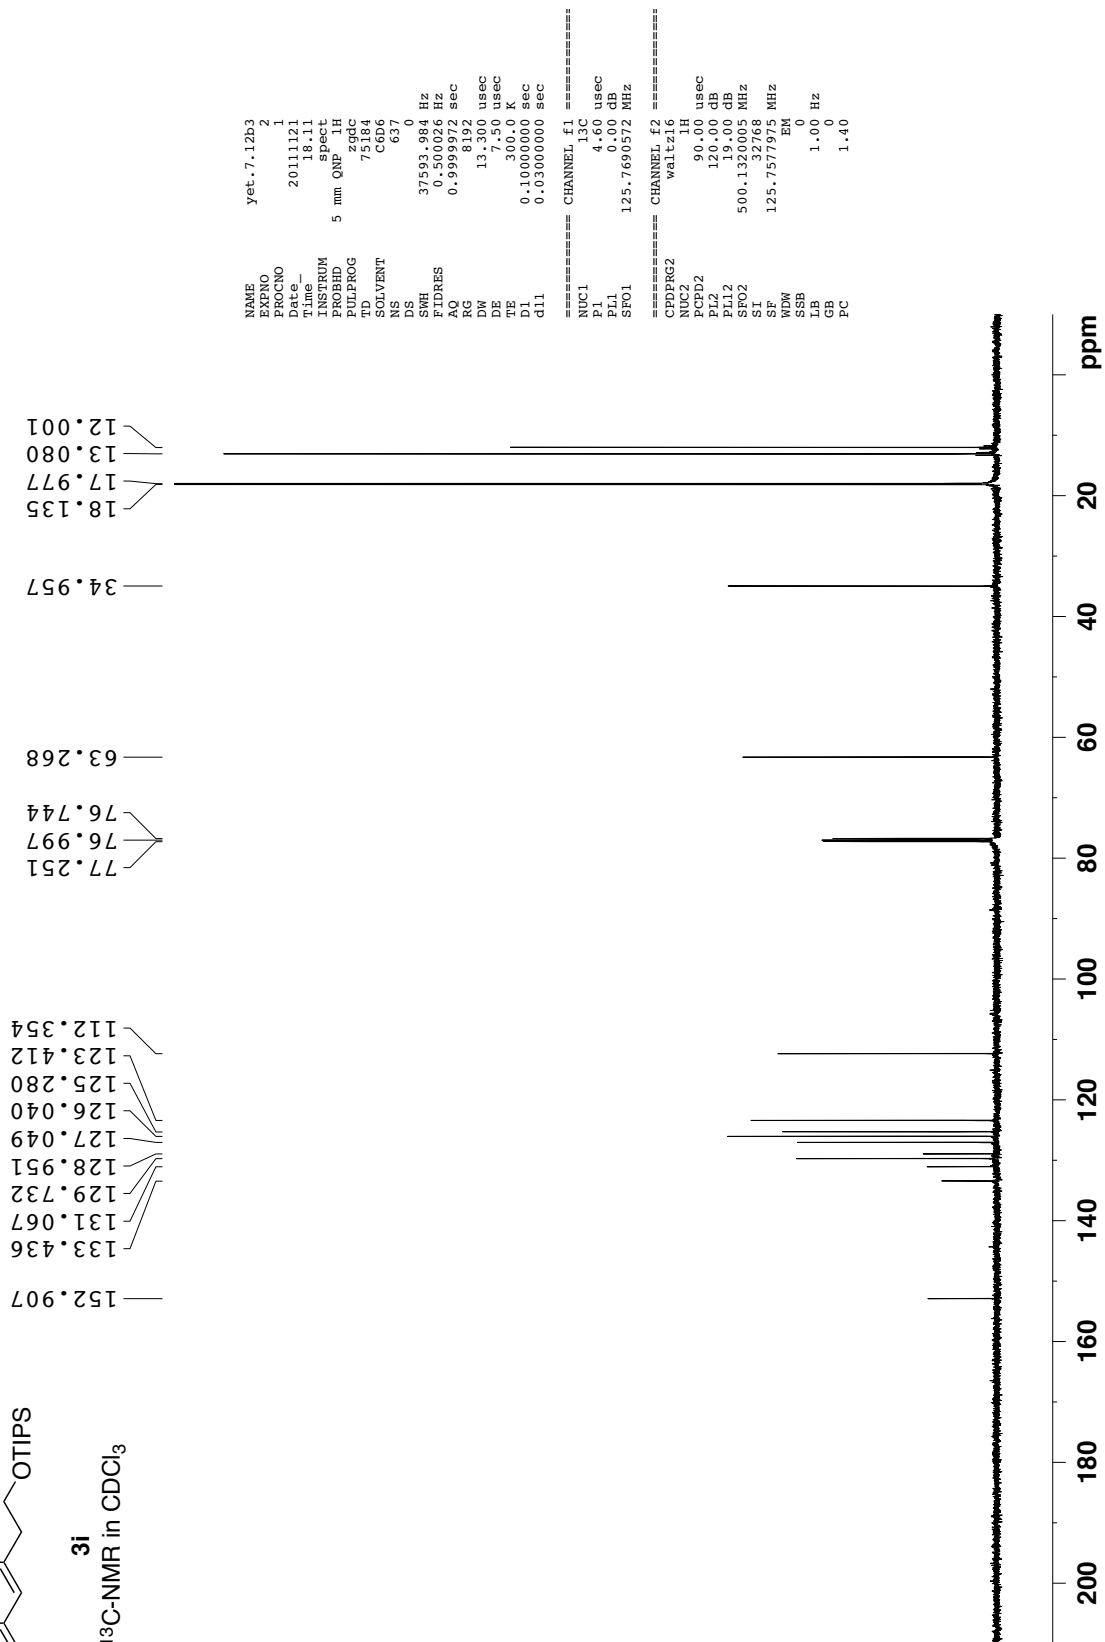

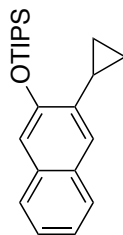

**3j**  
<sup>1</sup>H-NMR in CD<sub>2</sub>Cl<sub>2</sub>

```

Current Data Parameters
NAME      yet.7.36c
EXPNO    1
PROCNO   1

F2 - Acquisition Parameters
Date_    20111113
Time     21.30
INSTRUM spect
PROBHD   5 mm PABBI 1H/
PULPROG zg
TD       59998
SOLVENT CD2Cl2
NS       8
DS       0
SWH      10000.000 Hz
FIDRES   0.166672 Hz
AQ       2.9999499 sec
RG       90.5
DW       50.000 usec
DE       7.50 usec
TE       295.2 K
D1       10.0000000 sec
TD0      1

===== CHANNEL f1 =====
NUC1     1H
P1       8.70 usec
PL1      0.00 dB
SFO1     499.8729992 MHz

F2 - Processing parameters
SI       32768
SF       499.8700257 MHz
WDW      hc
SGB      0
LB       0.00 Hz
GB       0
PC       1.00
    
```

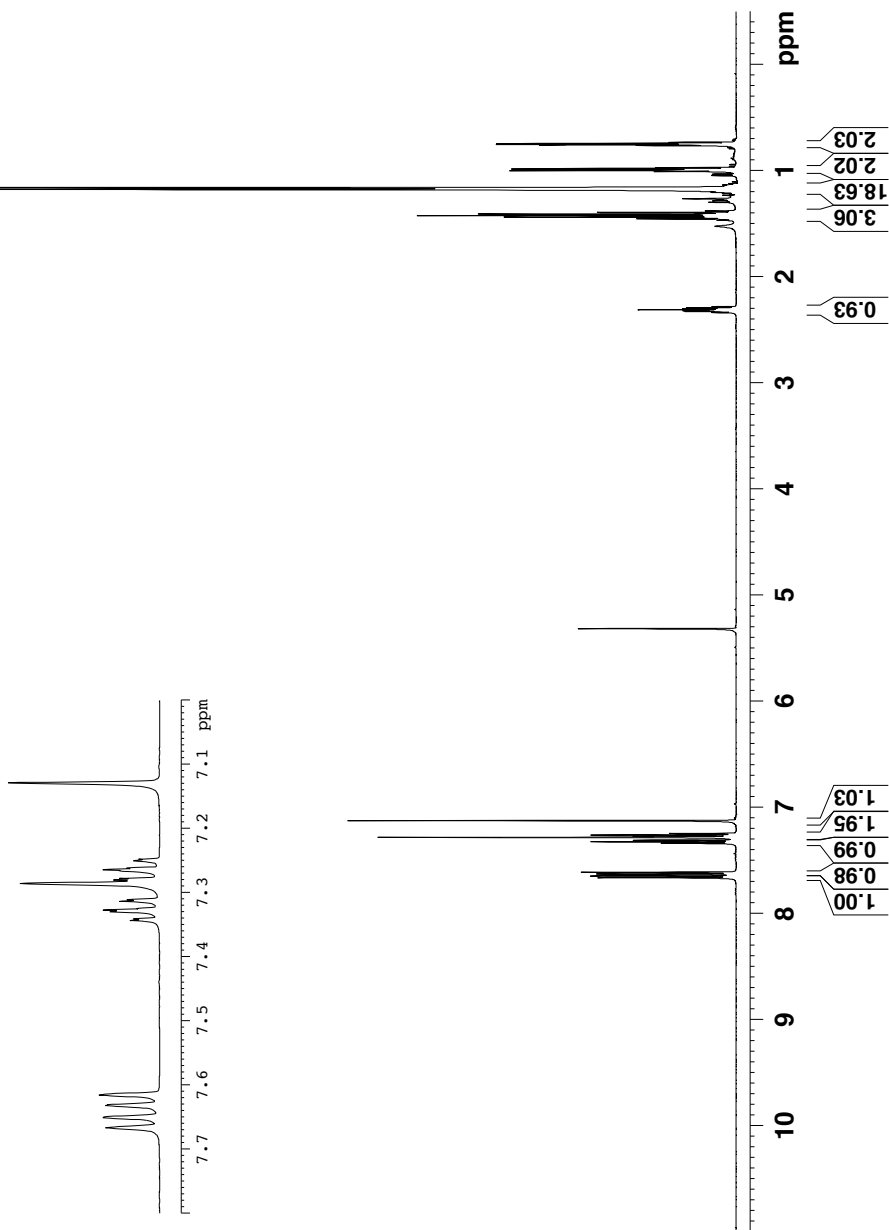

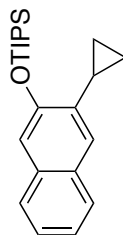

**3j**  
<sup>13</sup>C-NMR in CDCl<sub>3</sub>

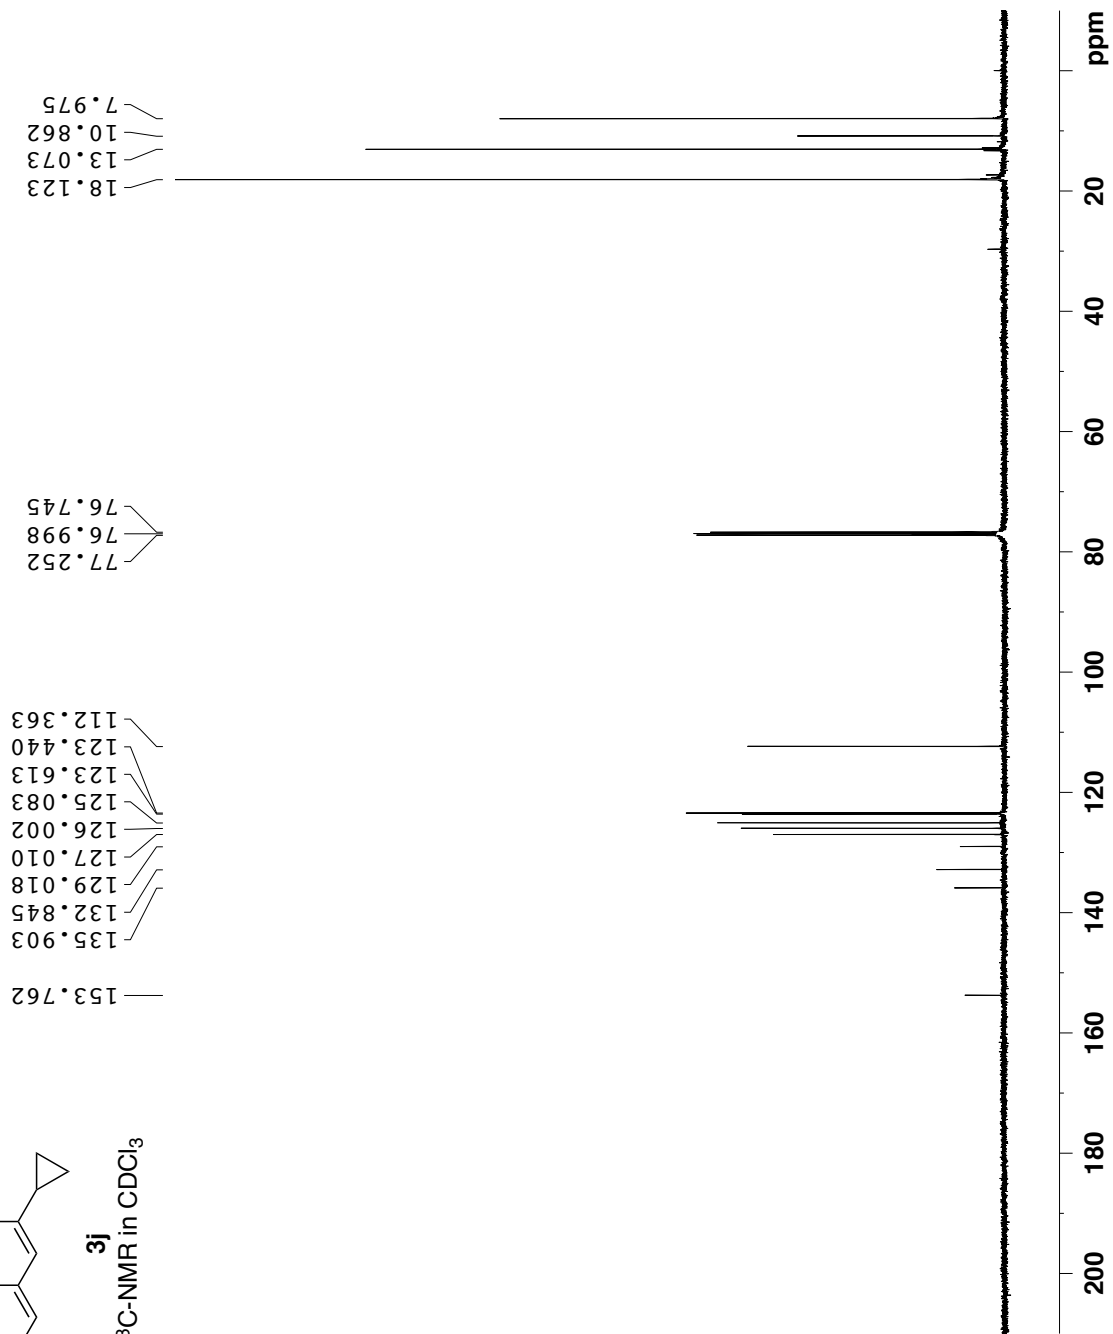

```

NAME      yet.7.36c
EXPNO     2
PROCNO    1
Date_     20111112
Time      18.51
INSTRUM   spect
PROBHD    5 mm QNP 1H
PULPROG   zgpgc
TD         75184
SOLVENT   CDCl3
NS         4295
DS         0
SWH        37593.984 Hz
FIDRES     0.500026 Hz
AQ         0.9999972 sec
RG         8192
DW         13.300 usec
DE         7.50 usec
TE         300.0 K
D1         0.10000000 sec
d11        0.03000000 sec

===== CHANNEL f1 =====
NUC1       13C
P1         4.60 usec
PL1        0.00 dB
SFO1       125.7690572 MHz

===== CHANNEL f2 =====
CPDPRG2    waltz16
NUC2       13C
P2         90.00 usec
PL2        120.00 dB
PL12       19.00 dB
SFO2       500.1320005 MHz
SI         32768
SF         125.7577917 MHz
WDW        EM
SSB        0
LB         1.00 Hz
GB         0
FC         1.40
    
```

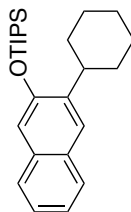

**3k**  
<sup>1</sup>H-NMR in CDCl<sub>3</sub>

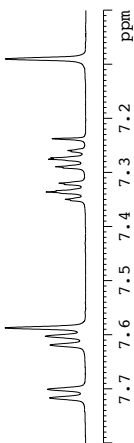

```

NAME                               Yet.7.114b1
EXPNO                               1
PROCNO                               1
Date_                                20111220
Time_                                14.13
INSTRUM                             spect
PROBHD                               5 mm QNP 1H
PULPROG                              zgpg30
F2 - F1                              480.13
SOLVENT                              CDCl3
NS                                    4
DS                                    0
SWH                                  8012.820 Hz
FIDRES                               0.166670 Hz
AQ                                   2.9999924 sec
RG                                    32
DM                                   62.400 usec
DE                                   4.50 usec
TE                                   300.0 K
D1                                   15.00000000 sec

===== CHANNEL f1 =====
NUC1                                 1H
P1                                   9.00 usec
PL1                                  0.00 dB
SFO1                                500.1325006 MHz
SI                                   65536
SF                                   500.1300245 MHz
WDW                                  EM
SSB                                  0
GB                                   0
PC                                   1.00
    
```

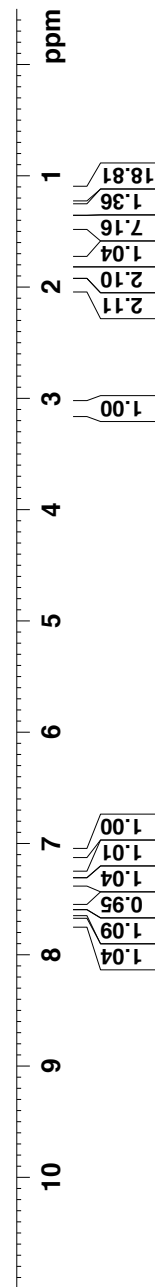

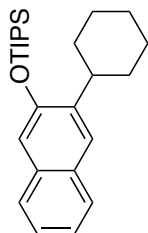

**3k**  
<sup>13</sup>C-NMR in CDCl<sub>3</sub>

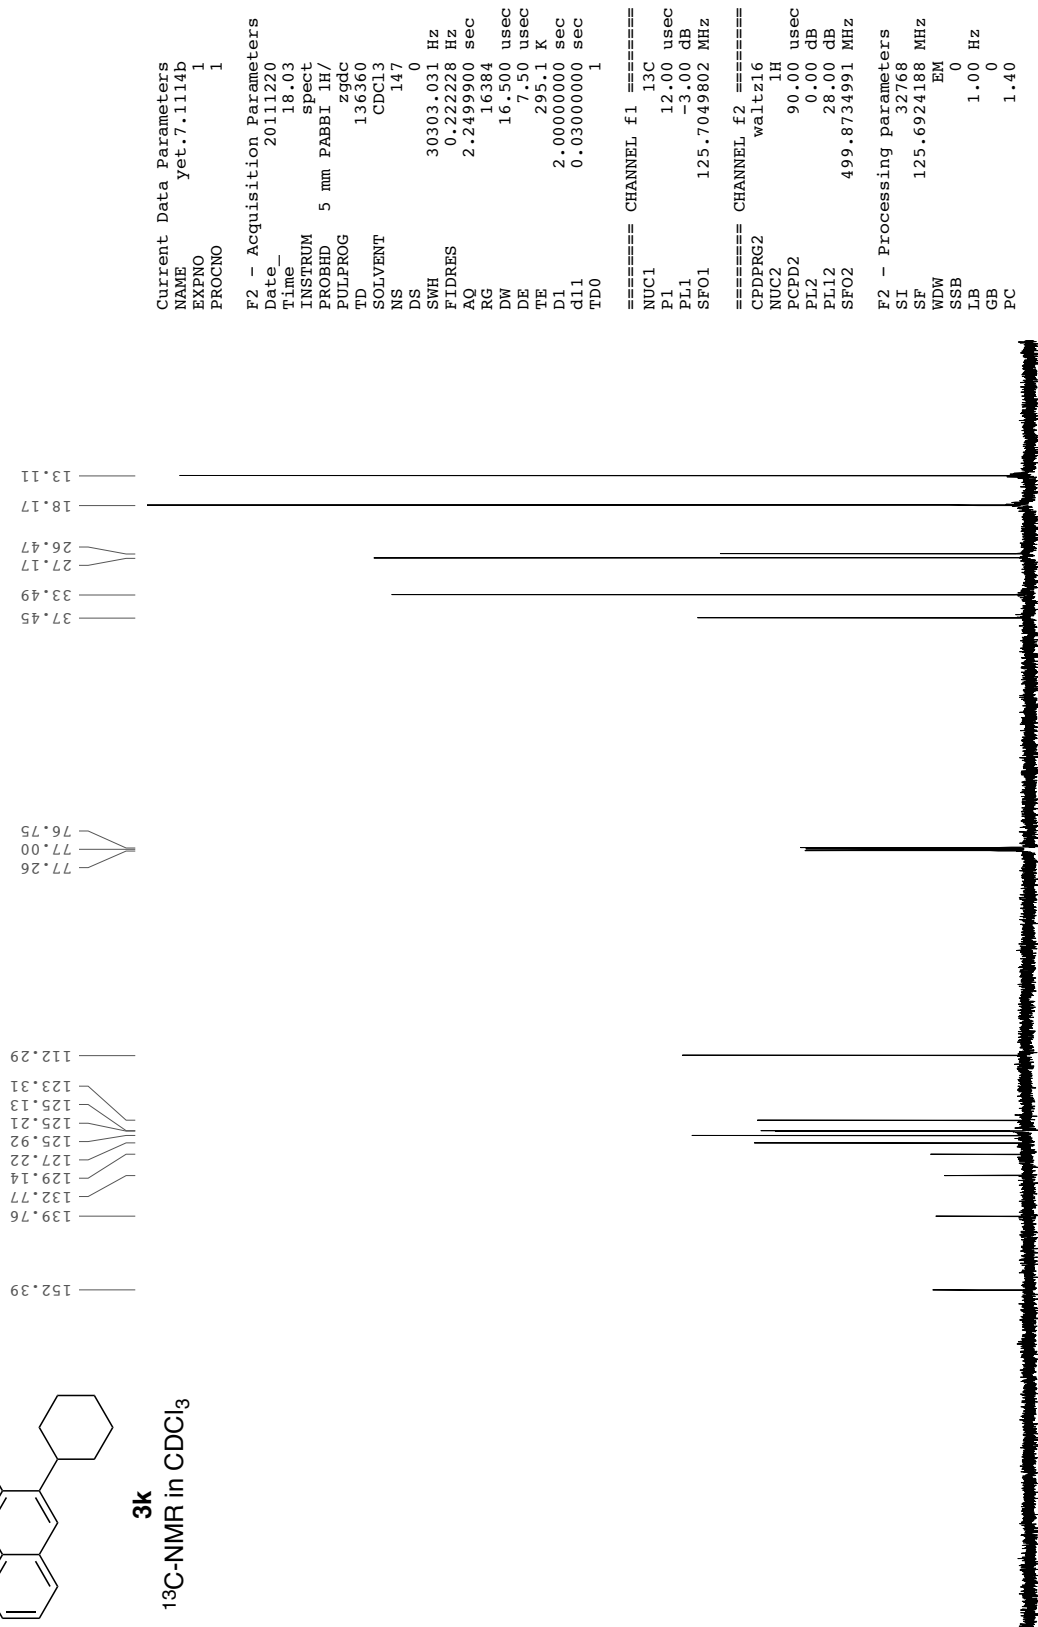

```

Current Data Parameters
NAME      Yet.7.1114b
EXPNO    1
PROCNO   1

F2 - Acquisition Parameters
Date_    20111220
Time_    18.03
INSTRUM  spect
PROBHD   5 mm PABBI 1H/
PULPROG  zgdc
TD       136360
SOLVENT  CDCl3
NS       147
DS       0
SWH      30303.031 Hz
FIDRES   0.222228 Hz
AQ       2.2499900 sec
RG       16384
DW       16.500 usec
DE       7.50 usec
TE       295.1 K
D1       2.00000000 sec
d11      0.03000000 sec
TD0      1

===== CHANNEL f1 =====
NUC1     13C
P1       12.00 usec
PL1      -3.00 dB
SFO1     125.7049802 MHz

===== CHANNEL f2 =====
CPDPRG2  waltz16
NUC2     1H
PCPD2    90.00 usec
PL2      0.00 dB
PL12     28.00 dB
SFO2     499.8734991 MHz

F2 - Processing parameters
SI       32768
SF       125.6924188 MHz
WDW      EM
SSB      0
LB       1.00 Hz
GB       0
PC       1.40
    
```



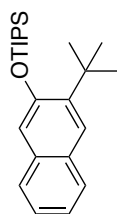

**31**  
<sup>1</sup>H-NMR in CDCl<sub>3</sub>

7.77  
7.76  
7.75  
7.64  
7.63  
7.40  
7.40  
7.39  
7.37  
7.37  
7.34  
7.33  
7.32  
7.31  
7.30  
7.26  
7.13

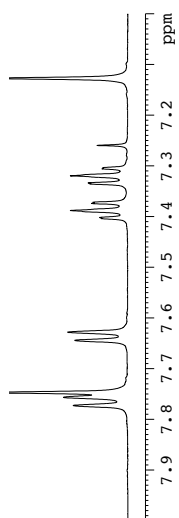

1.60  
1.58  
1.56  
1.55  
1.53  
1.52  
1.50  
1.49  
1.46  
1.24  
1.22

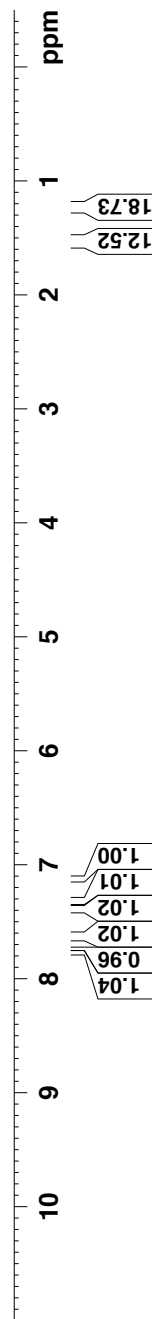

```

NAME yet.7.126b1
EXPNO 1
PROCNO 1
Date_ 20120102
Time_ 14.25
INSTRUM spect
PROBHD 5 mm QNP 1H
PULPROG zg
TD 48076
SOLVENT CDCl3
NS 4
DS 0
SWH 8012.820 Hz
SF 0.166670 Hz
FIDRES 2.9999924 sec
AQ 1.6
RG 62.400 usec
DE 4.50 usec
TE 300.0 K
D1 15.0000000 sec
===== CHANNEL f1 =====
NUC1 13C
P1 9.00 usec
PL1 0.00 dB
SFO1 500.1325006 MHz
SI 65536
SF 500.1300134 MHz
WDW EM
SSB 0
LB 0
GB 0
PC 1.00
    
```

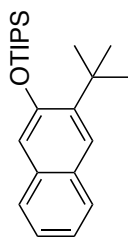

**3i**  
<sup>13</sup>C-NMR in CDCl<sub>3</sub>

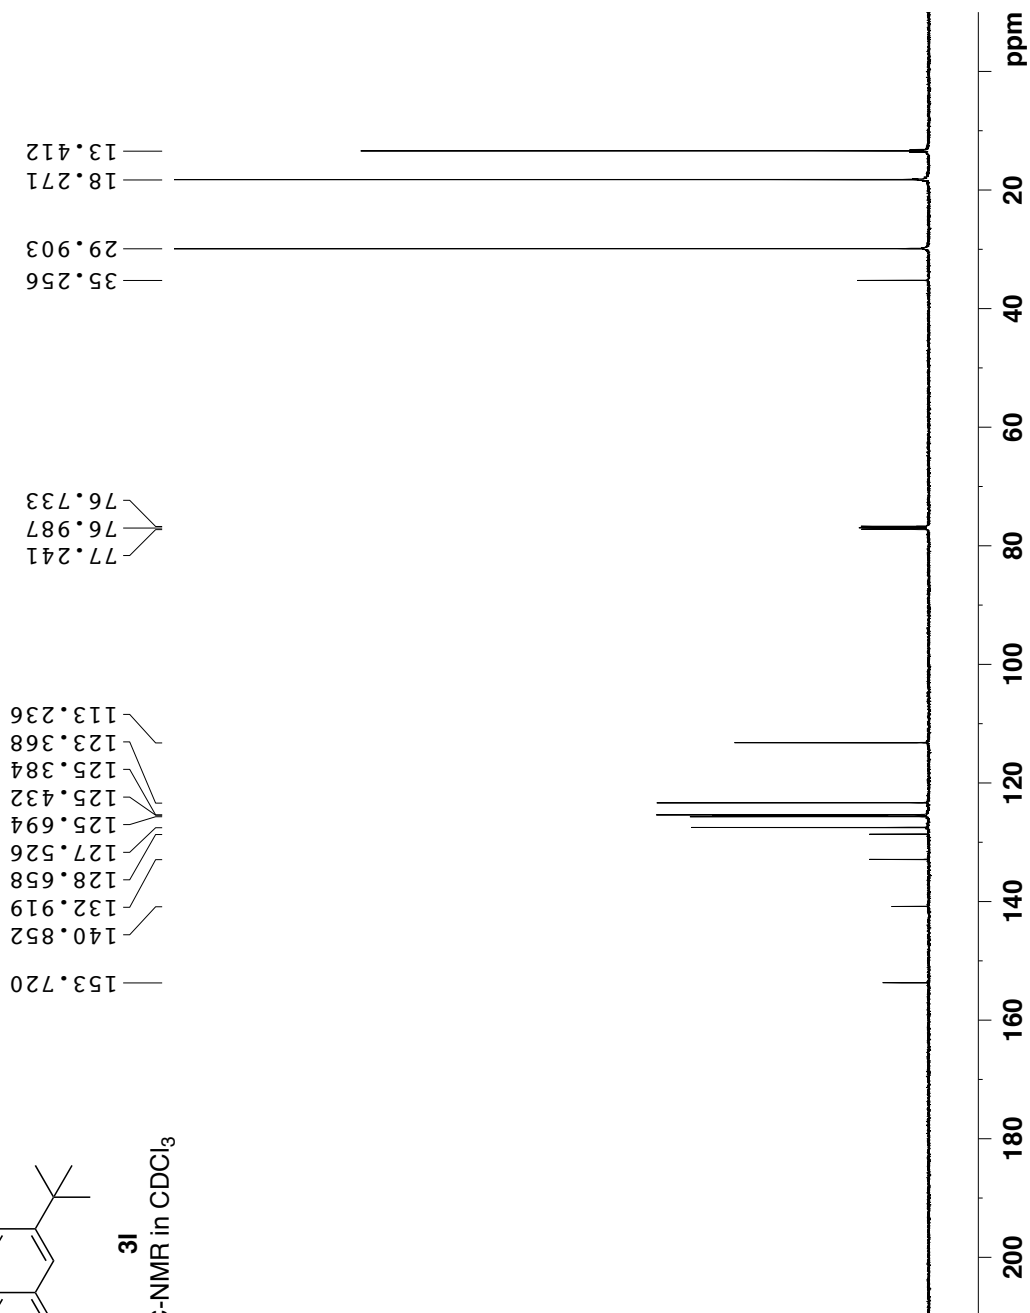

```

NAME                               yet. 7-126b1
EXPNO                               2
PROCNO                              1
Date_                                20120102
Time                                 14.34
INSTRUM                             spect
PROBHD                               5 mm QNP 1H
PULPROG                             zgpg
TD                                     65536
SOLVENT                               CDCl3
NS                                     900
DS                                     0
SWH                                   37593.984 Hz
FIDRES                               0.500026 Hz
AQ                                   0.9999972 sec
RG                                   8192
DW                                   13.300 usec
DE                                   7.50 usec
TE                                   300.0 K
TE0                                   300.000 sec
D11                                  0.10300000 sec

===== CHANNEL f1 =====
NUC1                                  13C
P1                                   4.60 usec
PL1                                  0.00 dB
SFO1                                 125.7690572 MHz

===== CHANNEL f2 =====
P2                                   90.00 usec
PL2                                  120.00 dB
PL12                                 19.00 dB
SFO2                                 500.1320005 MHz
SI                                    32768
SF                                   125.7577963 MHz
EM                                    0
LB                                    1.00 Hz
GB                                    0
PC                                    1.40
    
```

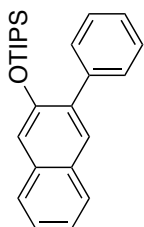

**3m**  
<sup>1</sup>H-NMR in CDCl<sub>3</sub>

```

NAME      yet.7.76b
EXPNO    1
PROCNO   1
Date_    20111129
Time_    21.56
INSTRUM  spect
PROBHD   5 mm QNP 1H
PULPROG  zgpg30
RG        480.00
SOLVENT  CDCl3
NS        4
DS        0
SWH       8012.820 Hz
FIDRES    0.166670 Hz
AQ         2.999924 sec
RG         64
DW         62.400 usec
DE         4.50 usec
TE        300.0 K
D1        10.0000000 sec

===== CHANNEL f1 =====
NUC1      1H
P1        9.00 usec
PL1       0.00 dB
SFO1      500.1325006 MHz
SI        65536
SF         500.1300234 MHz
WDW       EM
SSB       0
LB        0.30 Hz
GB        0
PC        1.00
    
```

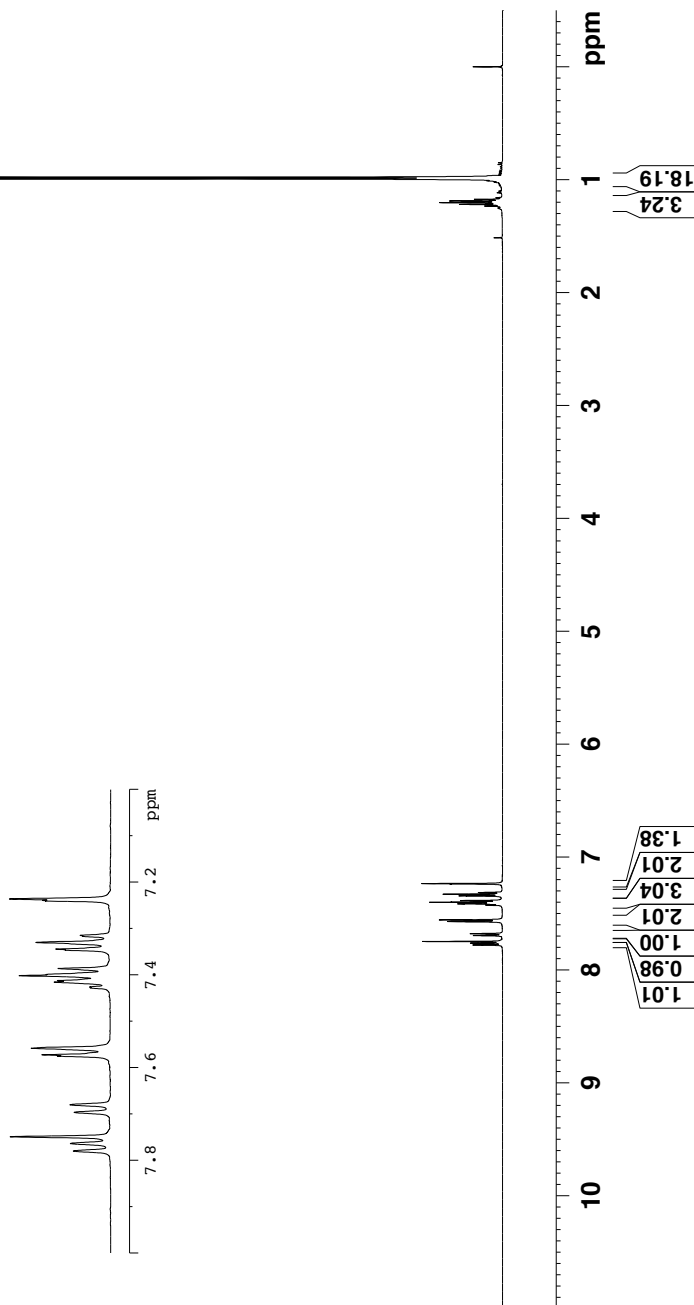

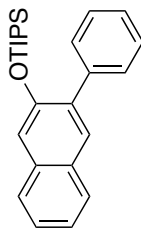

**3m**  
<sup>13</sup>C-NMR in CDCl<sub>3</sub>

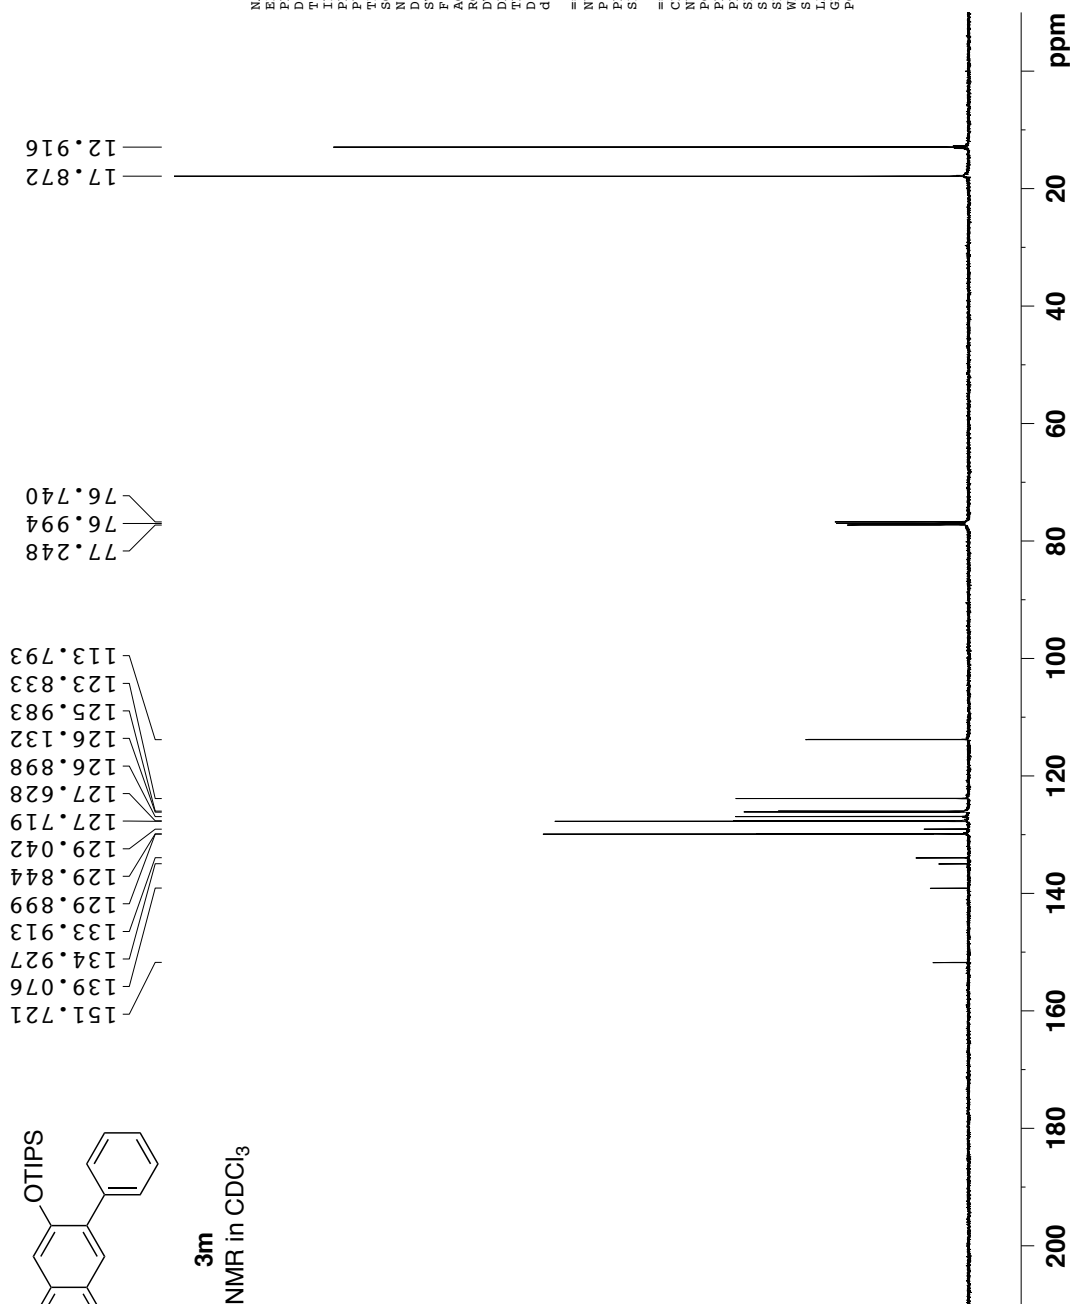

```

NAME                               yet..7..76b
EXPNO                               2
PROCNO                              1
Date_  _                            20111129
Time_  _                            22.01
INSTRUM spect
PROBHD 5 mm QNP 1H
PULPROG zgdc
TD      75184
SOLVENT C6D6
NS      1905
DS      0
SWH     37593.084 Hz
WDW     0.50002 Hz
SSB     0.9999872 sec
RG      8192
DE      13.300 usec
TE      7.50 usec
D1      300.0 K
D11     0.10000000 sec
d11     0.03000000 sec

===== CHANNEL f1 =====
NUC1    13C
P1      4.60 usec
PL1     0.00 dB
SFO1    125.7690572 MHz

===== CHANNEL f2 =====
CPDPRG2 waltz16
NUC2    1H
PCPD2   90.00 usec
PL2     120.00 dB
PL12    120.00 dB
SFO2    500.1326005 MHz
ST      32768
SF      125.7577941 MHz
WDW     EM
SSB     0
LB      1.00 Hz
GB      0
PC      1.40
    
```

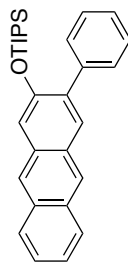

**3n**  
<sup>1</sup>H-NMR in CDCl<sub>3</sub>

```

NAME          yst.7.86a
EXPNO         1
PROCNO        1
Date_         20111203
Time         14.59
INSTRUM       spect
PROBHD        5 mm QNP 1H
PULPROG       zgpg30
TD            48072
SOLVENT       CDCl3
NS            6
DS            0
SWH           8012.820 Hz
FIDRES        0.166670 Hz
AQ            2.999924 sec
RG            128
DW            62.400 usec
DE            3.000 usec
TE            300.0 K
D1            15.00000000 sec

===== CHANNEL f1 =====
NUC1          1H
P1            9.00 usec
PL1           0.00 dB
SFO1          500.1325006 MHz
SI            65536
SF            500.1300196 MHz
WDW           EM
SSB           0
LB            0.30 Hz
GB            0
PC            1.00
    
```

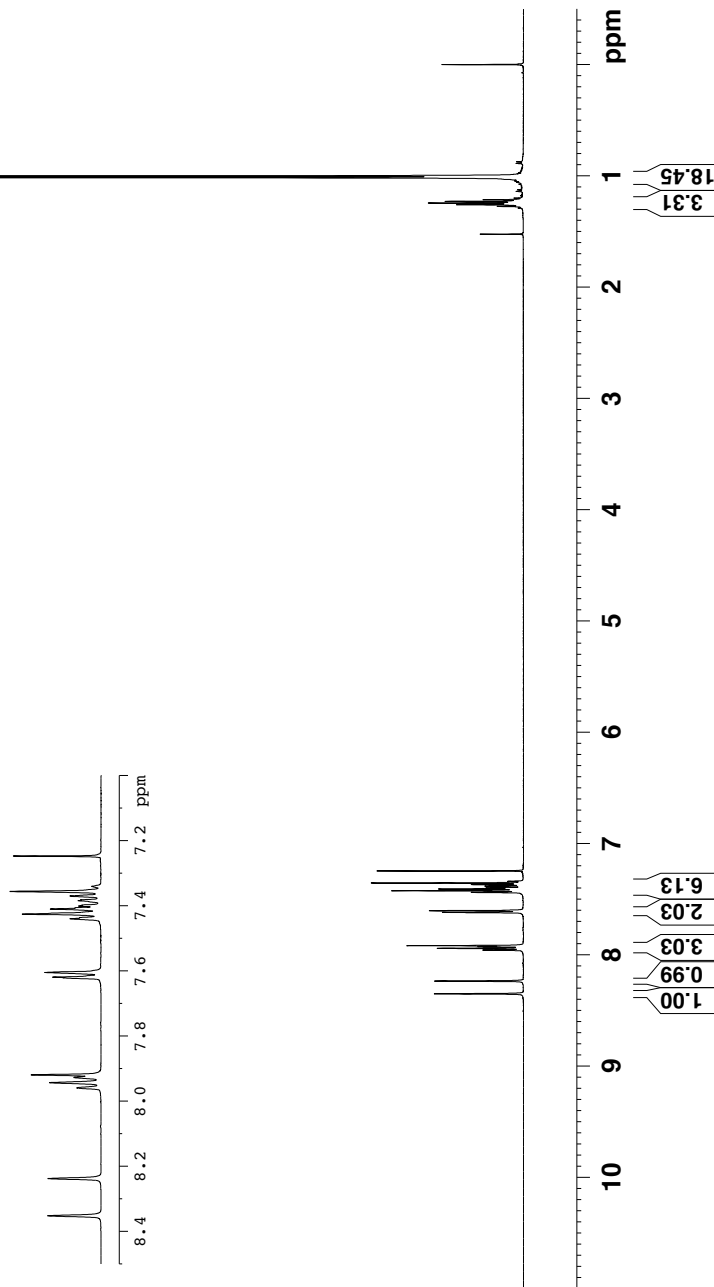

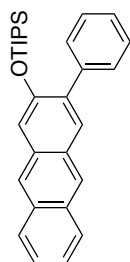

**3n**  
<sup>13</sup>C-NMR in CDCl<sub>3</sub>

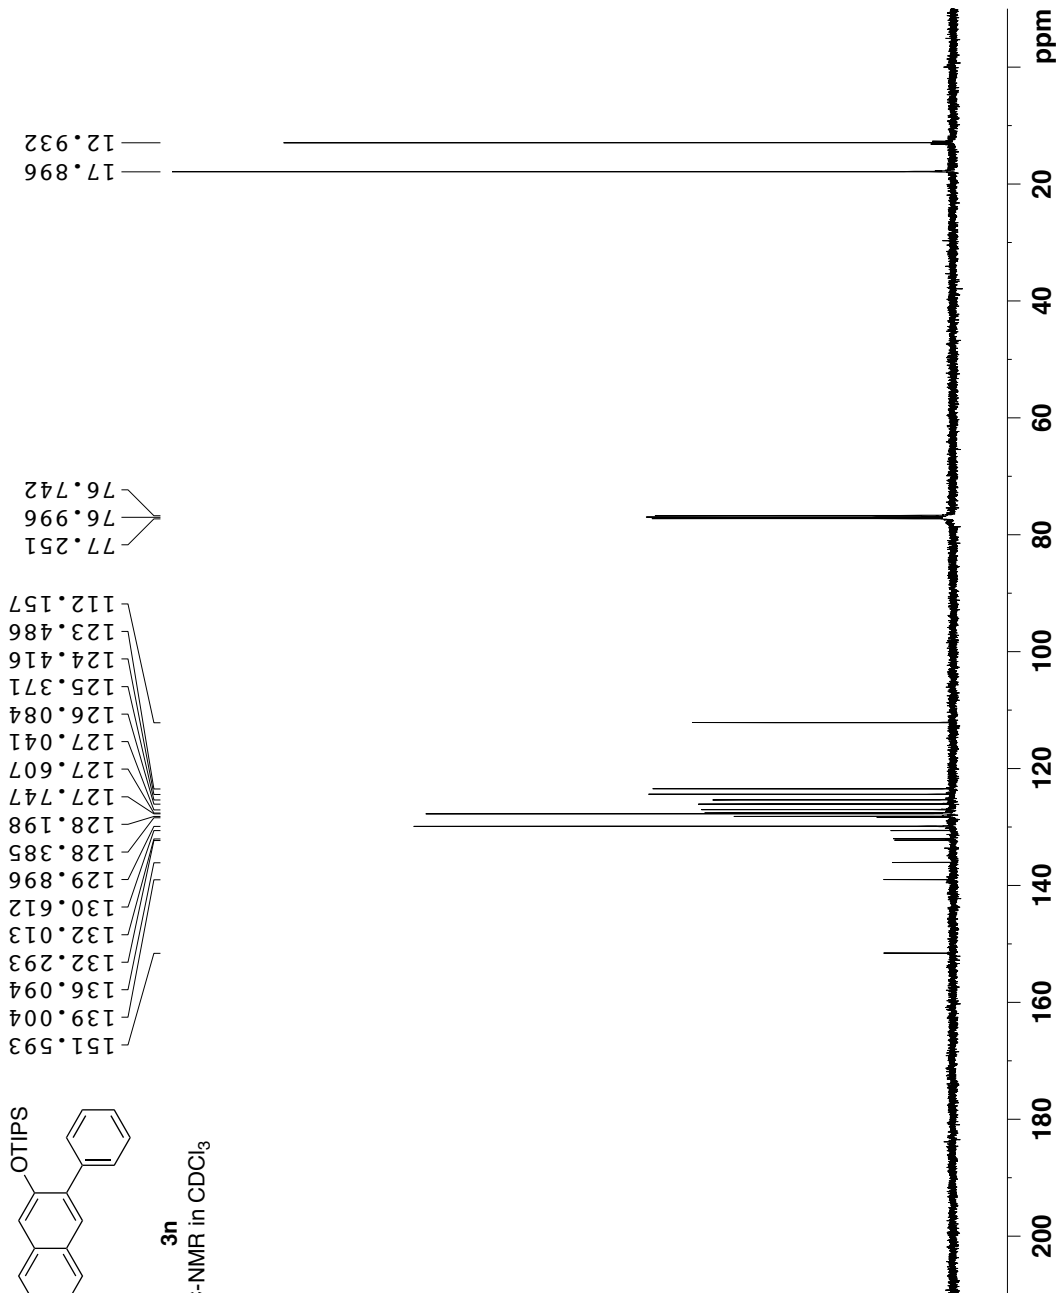

```

NAME          yet.7.86a
EXPNO         2
PROCNO        1
Date_         20111203
Time_         15.12
INSTRUM       spect
PROBHD        5 mm QNP 1H
PULPROG       zgpg
TD            75184
SOLVENT       CDCl3
NS           1566
DS           4
RG           37593.984 Hz
SRH          0.500026 Hz
FIDRES       0.9999972 sec
AQ           8192
RG           13.300 usec
DE           300.0 K
TE           7.50 usec
D1           0.10000000 sec
d11          0.03000000 sec

===== CHANNEL f1 =====
NUC1          13C
P1           4.60 usec
PL1          0.00 dB
SFO1         125.7690572 MHz

===== CHANNEL f2 =====
CPDPRG2       waltz16
NUC2          1H
PCPDZ        90.00 usec
PL2          120.00 dB
PL12         19.00 dB
SFO2         500.1320005 MHz
SI           32768
SF           125.7577929 MHz
WDW          EM
SSB          0
LB           1.00 Hz
GB           0
PC           1.40
    
```

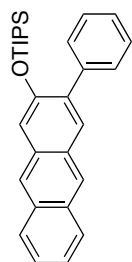

**3n**  
<sup>13</sup>C-NMR in CD<sub>2</sub>Cl<sub>2</sub>

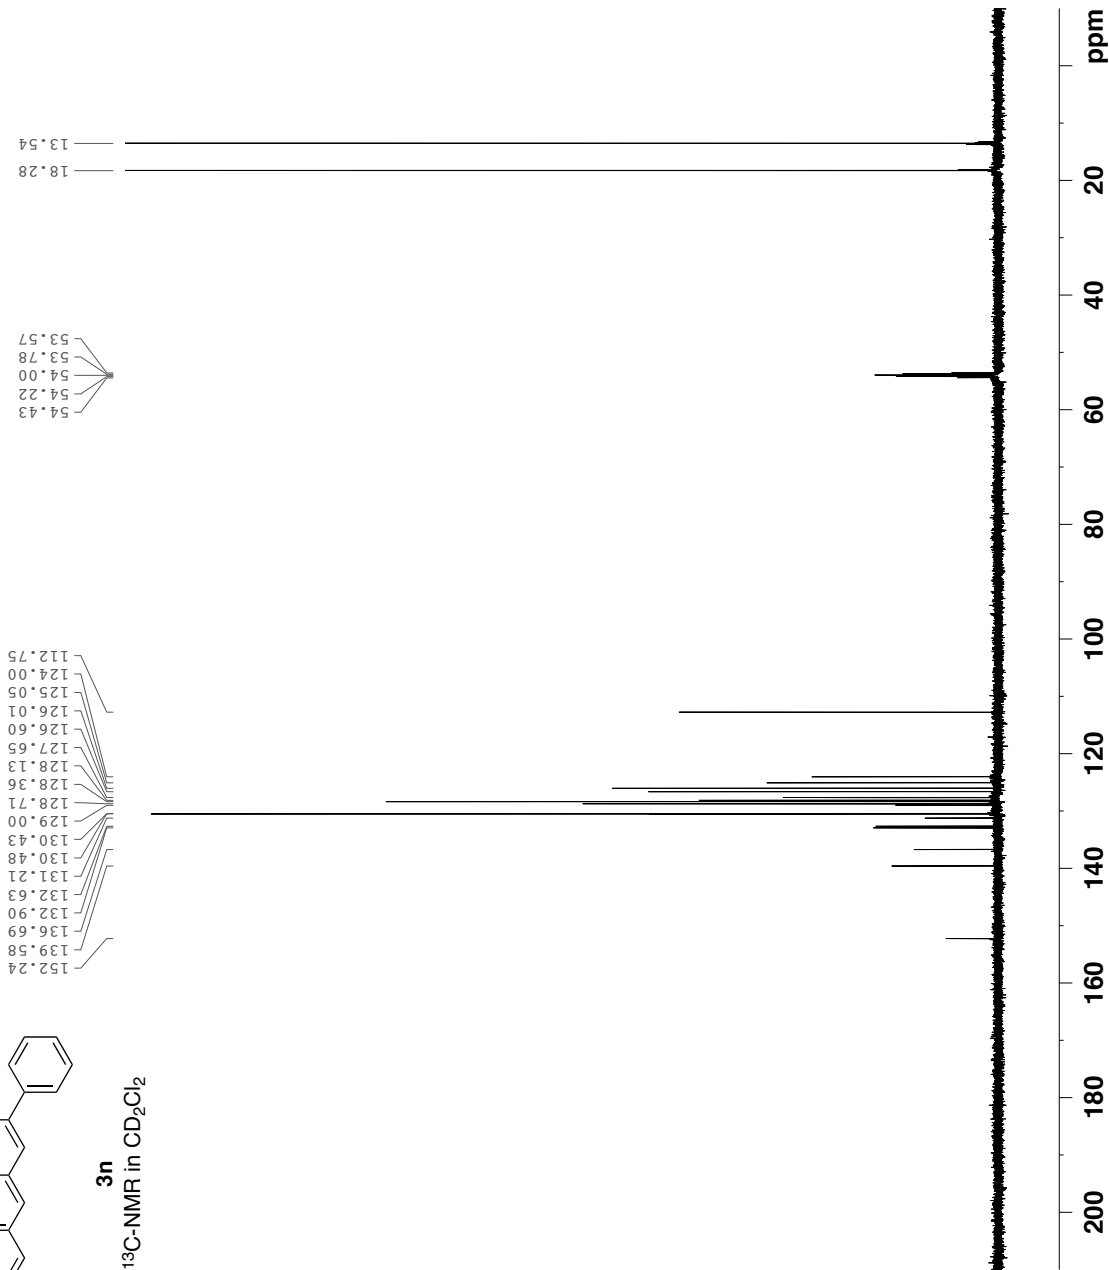

```

NAME                yet.7.86a2
EXPNO                1
PROCNO              1
Date_               20120129
Time_              5.57
INSTRUM            spect
PROBHD             5 mm QNP 1H/13
PULPROG           zgdc
TD                142854
SOLVENT           CD2Cl2
NS                188
DS                0
SWH               30303.031 Hz
FIDRES           0.212126 Hz
AQ              2.3571410 sec
RG              18390.4
DE              16.500 usec
WDW              7.50 usec
TE              295.5 K
D1              2.0000000 sec
d11             0.0300000 sec
TD0             1
===== CHANNEL f1 =====
NUC1            13C
P1              8.50 usec
PL1            0.00 dB
SFO1           125.7049802 MHz
===== CHANNEL f2 =====
CPDPRG2        waltz16
NUC2            1H
PCPD2          90.00 usec
PL2            1.00 dB
PL12           21.00 dB
SFO2           499.8734991 MHz
SI             32768
SF            125.6923423 MHz
WDW            rmc
SSB            0
LB            0.00 Hz
GB            0
PC            1.40
    
```

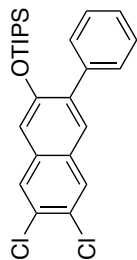

**3o**  
<sup>1</sup>H-NMR in CDCl<sub>3</sub>

```

NAME                               yet_7.84b
EXPNO                               1
PROCNO                              1
Date_                                20111120
Time_                                15.24
INSTRUM spect
PROBHD 5 mm QNP 1H
PULPROG zg
TD 48076
SOLVENT CDCl3
NS 4
DS 0
AQ 8012.820 Hz
FIDRES 0.166670 Hz
RG 2.9999924 sec
AQ 64
DE 62.400 usec
TE 4.50 usec
D1 300.0 K
D1 15.0000000 sec

===== CHANNEL f1 =====
NUC1 1H
P1 9.00 usec
PL1 0.00 dB
SFO1 500.1325006 MHz
SI 65536
SF 500.1300172 MHz
WDW EM
SSB 0
LB 0.30 Hz
GB 0
PC 1.00
    
```

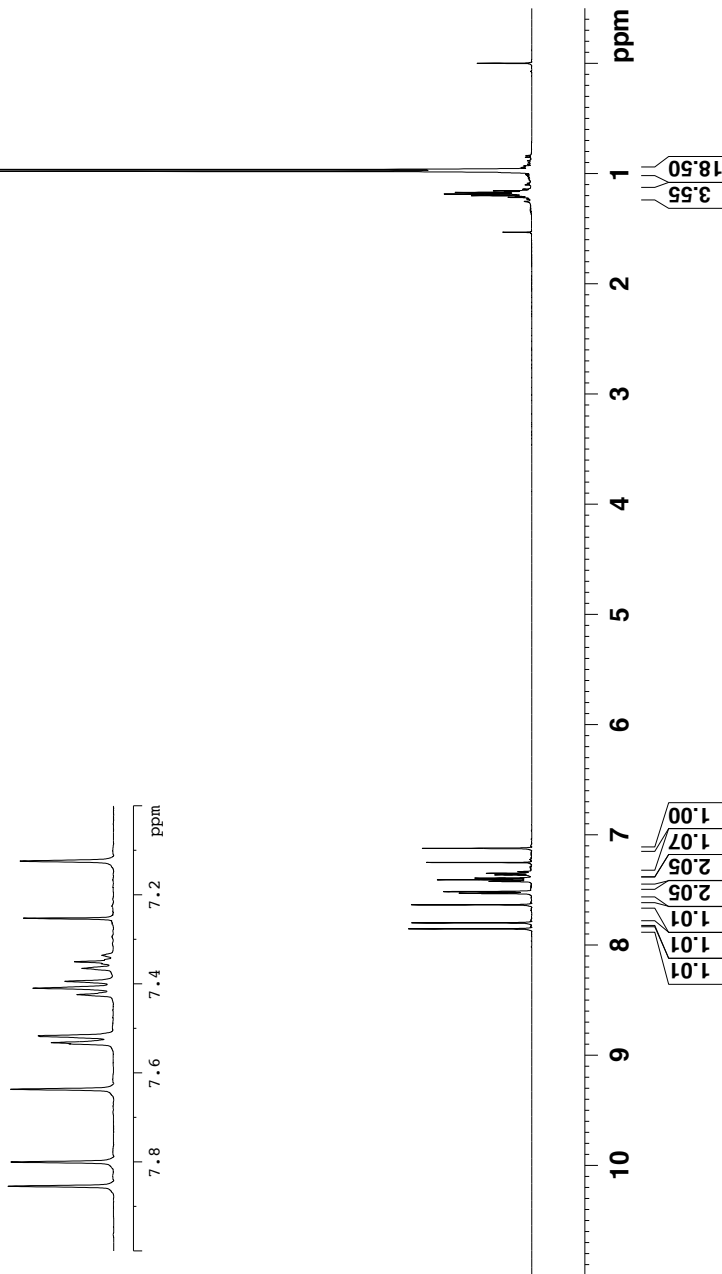



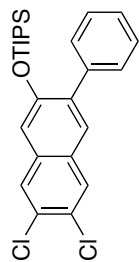

**3o**  
<sup>13</sup>C-NMR in CDCl<sub>3</sub>

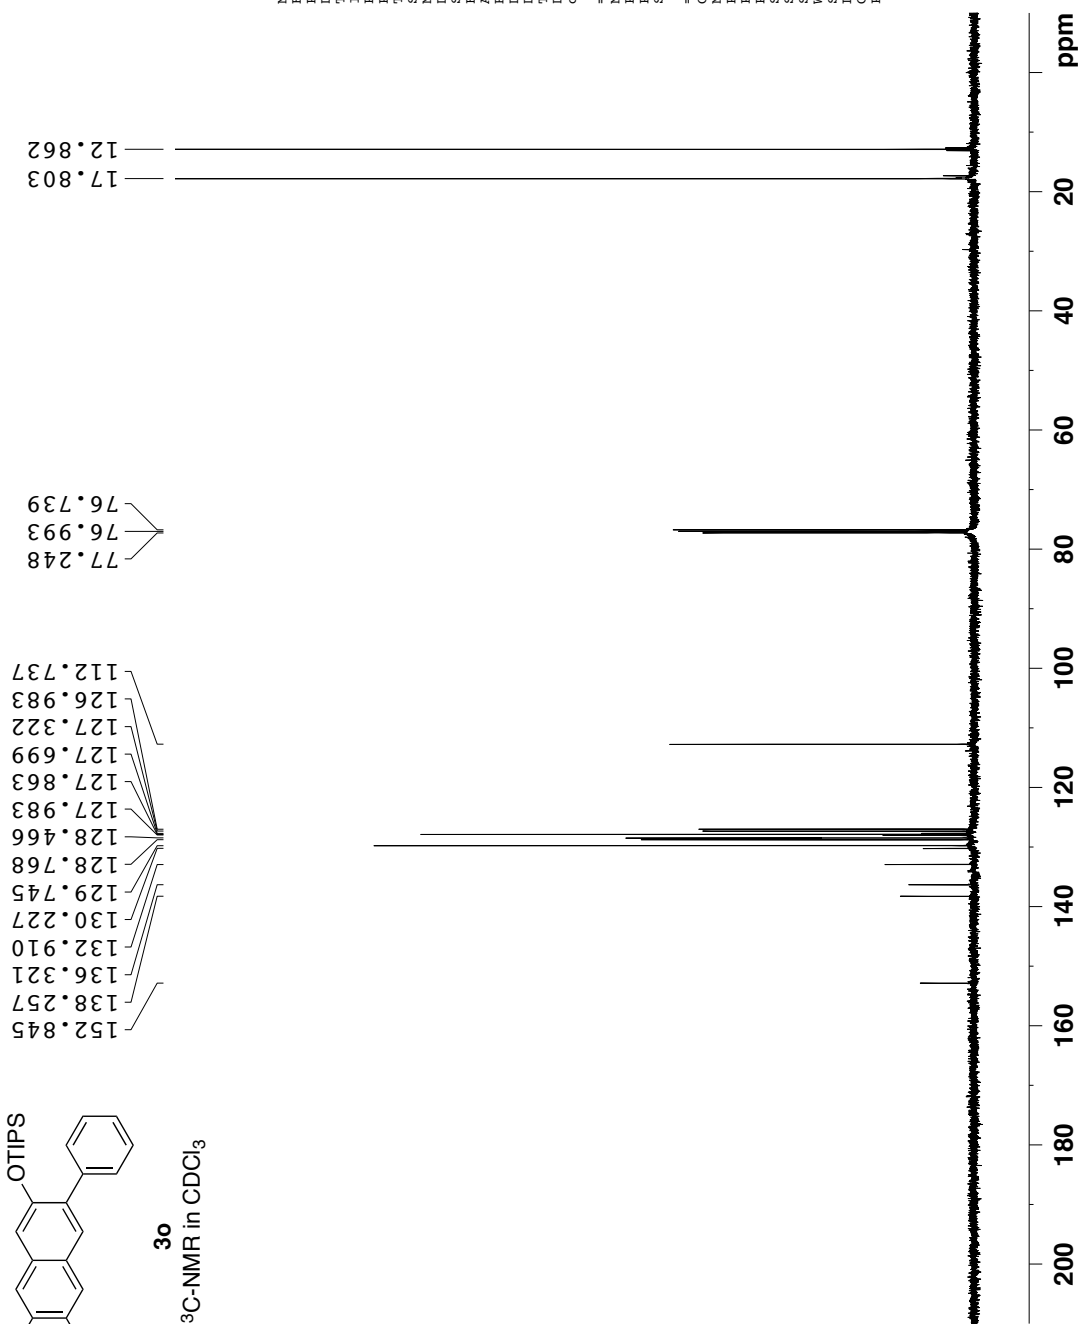

```

NAME                               yet.7.84b
EXPNO                               2
PROCNO                              1
Date_                                20111206
Time                               15.06
INSTRUM                               spect
PROBHD                               5 mm QNP 1H
PULPROG                               zgdc
TD                                   75184
SOLVENT                               C6D6
NS                                   1203
DS                                   0
SWH                                   37593.984 Hz
FIDRES                               0.500026 Hz
AQ                                   0.9998192 sec
RG                                   8192
DW                                   13.300 usec
DE                                   7.50 usec
TE                                   300.0 K
D1                                   0.10000000 sec
d11                                  0.03000000 sec

===== CHANNEL f1 =====
NUC1                                  13C
P1                                   4.00 usec
PL1                                   0.00 dB
SFO1                                  125.7690572 MHz

===== CHANNEL f2 =====
CPDPRG2                               wal1tz16
NUC2                                  1H
P2                                   90.00 usec
PL2                                   120.00 dB
PL12                                  19.00 dB
SFO2                                  500.1320005 MHz
ZGAG                                  9.00 usec
ST                                   125.7577999 MHz
WDW                                   EM
SSB                                   0
LB                                   1.00 Hz
GB                                   0
PC                                   1.40
  
```

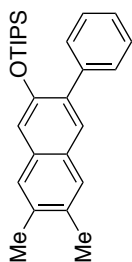

**3p**  
<sup>1</sup>H-NMR in CDCl<sub>3</sub>

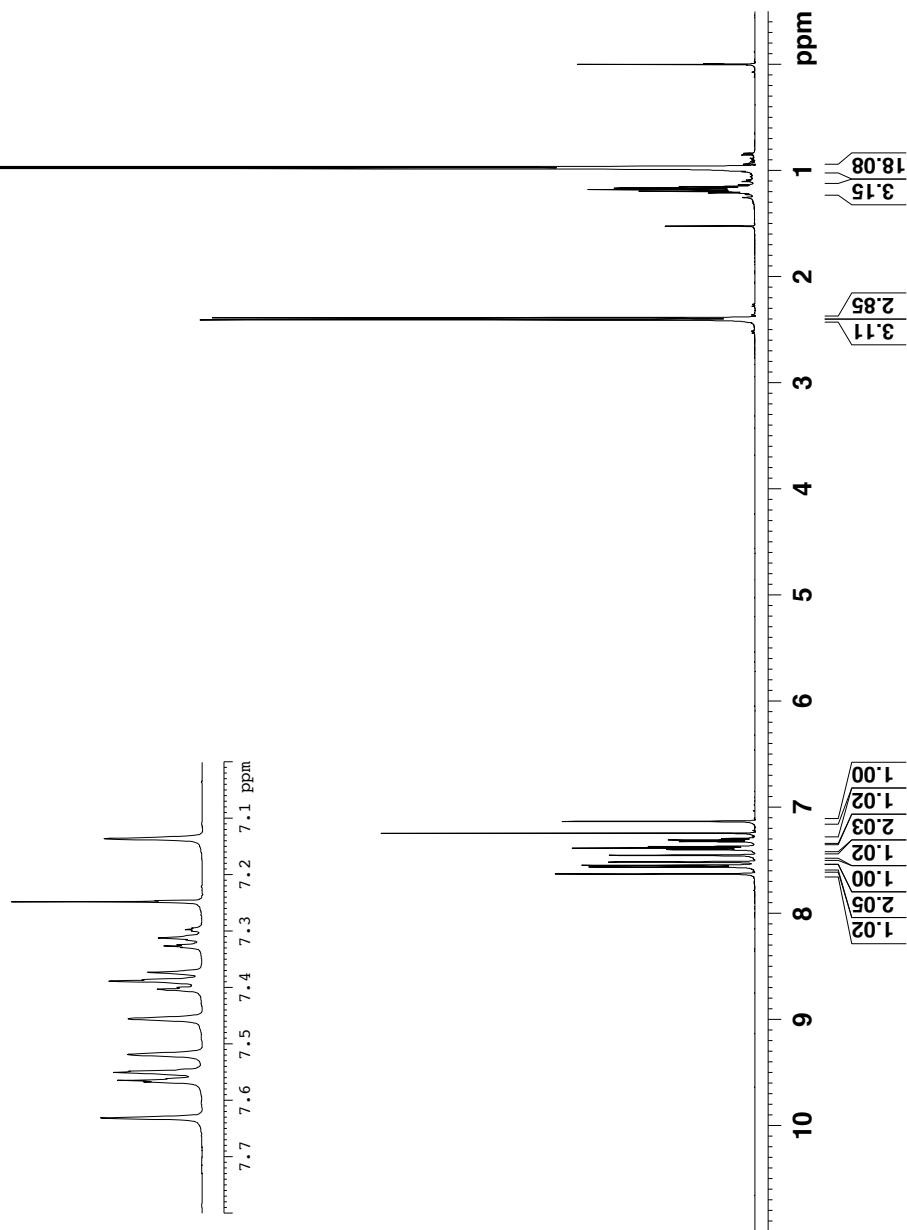

Current Data Parameters  
 NAME yet.7.88a  
 EXPNO 1  
 PROCNO 1

F2 - Acquisition Parameter  
 Date\_ 20111204  
 Time 20.13  
 INSTRUM spect  
 PROBHD 5 mm PABBI 1H/  
 PULPROG zg  
 TD 59998  
 SOLVENT CDCl3  
 NS 4  
 DS 0  
 SWH 10000.000 Hz  
 FIDRES 0.166672 Hz  
 AQ 2.9999499 se  
 RG 80.6  
 DW 50.000 us  
 DE 7.50 us  
 TE 295.4 K  
 D1 15.0000000 se  
 TD0 1

==== CHANNEL f1 =====  
 NUC1 1H  
 P1 8.70 us  
 PL1 0.00 dB  
 SFO1 499.872992 MH

F2 - Processing parameters  
 SI 32768  
 SF 499.8700248 MH  
 WDW no  
 SSB 0  
 LB 0.00 Hz  
 GB 0  
 PC 1.00

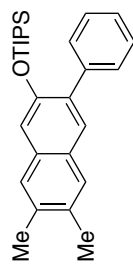

**3p**  
<sup>13</sup>C-NMR in CDCl<sub>3</sub>

20.21  
 19.99  
 17.89  
 12.92

77.25  
 77.00  
 76.75

151.07  
 139.37  
 135.74  
 133.94  
 133.34  
 132.72  
 129.93  
 128.84  
 127.98  
 127.66  
 127.12  
 126.69  
 125.75  
 113.03

```

Current Data Parameters
NAME      yet.7.88a
EXPNO    2
PROCNO   1

F2 - Acquisition Parameters
Date_    20111204
Time     20.21
INSTRUM spect
PROBHD   5 mm PABBI 1H/
PULPROG zgqc
TD       136360
SOLVENT  CDCl3
NS       1534
DS       0
SWH      30303.031 Hz
FIDRES   0.222228 Hz
AQ       2.2499900 sec
RG       18390.4
DW       16.500 usec
DE       7.50 usec
TE       295.3 K
d1       2.0000000 sec
d11      0.0300000 sec
TD0      1

===== CHANNEL f1 =====
NUC1     13C
P1       12.00 usec
PL1      -3.00 dB
SFO1     125.7049802 MHz

===== CHANNEL f2 =====
CPDPRG2 waltz16
NUC2     1H
PCPD2    90.00 usec
PL2      0.00 dB
PL12     28.00 dB
SFO2     499.8734991 MHz

F2 - Processing parameters
SI       32768
SF       125.6924180 MHz
WDW      no
SSB      0
LB       0.00 Hz
GB       0
PC       1.40
    
```

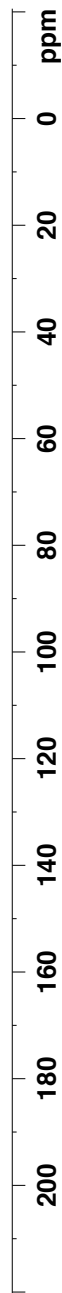

Supplement: NIHMS380577-supplement-1_si_001.pdf [file NIHMS380577-supplement-1_si_001.pdf]
